# Supplementary material for: Do changing levels of maternal exercise during pregnancy affect neonatal adiposity? Secondary analysis of the babies after SCOPE: evaluating the longitudinal impact using neurological and nutritional endpoints (BASELINE) birth cohort (Cork, Ireland)
Source: PubMed Central journal article supplement — BMJ Open. 2017 Dec 1;7(11):e017987. doi: 10.1136/bmjopen-2017-017987 (PMC5719326; doi:10.1136/bmjopen-2017-017987), 2017-12-01
Supplement: bmjopen-2017-017987.draft_revisions.pdf [file bmjopen-2017-017987.draft_revisions.pdf]

# BMJ Open

BMJ Open is committed to open peer review. As part of this commitment we make the peer review history of every article we publish publicly available.

When an article is published we post the peer reviewers' comments and the authors' responses online. We also post the versions of the paper that were used during peer review. These are the versions that the peer review comments apply to.

The versions of the paper that follow are the versions that were submitted during the peer review process. They are not the versions of record or the final published versions. They should not be cited or distributed as the published version of this manuscript.

BMJ Open is an open access journal and the full, final, typeset and author-corrected version of record of the manuscript is available on our site with no access controls, subscription charges or pay-per-view fees (<http://bmjopen.bmj.com>).

If you have any questions on BMJ Open's open peer review process please email [editorial.bmjopen@bmj.com](mailto:editorial.bmjopen@bmj.com)

# BMJ Open

## Changing levels of maternal exercise during pregnancy and neonatal adiposity: secondary analysis of the SCOPE/BASELINE birth cohort

|                                 |                                                                                                                                                                                                                                                                                                                                                                                                                                                                                                                                                                                                                                                                                                                            |
|---------------------------------|----------------------------------------------------------------------------------------------------------------------------------------------------------------------------------------------------------------------------------------------------------------------------------------------------------------------------------------------------------------------------------------------------------------------------------------------------------------------------------------------------------------------------------------------------------------------------------------------------------------------------------------------------------------------------------------------------------------------------|
| Journal:                        | <i>BMJ Open</i>                                                                                                                                                                                                                                                                                                                                                                                                                                                                                                                                                                                                                                                                                                            |
| Manuscript ID                   | bmjopen-2017-017987                                                                                                                                                                                                                                                                                                                                                                                                                                                                                                                                                                                                                                                                                                        |
| Article Type:                   | Research                                                                                                                                                                                                                                                                                                                                                                                                                                                                                                                                                                                                                                                                                                                   |
| Date Submitted by the Author:   | 31-May-2017                                                                                                                                                                                                                                                                                                                                                                                                                                                                                                                                                                                                                                                                                                                |
| Complete List of Authors:       | Norris, Tom; University of Leicester College of Medicine Biological Sciences and Psychology, Health Sciences<br>McCarthy, Fergus; The Irish Centre for Fetal and Neonatal Translational Research (INFANT), Department of Obstetrics and Gynecology<br>Khashan, Ali; University College Cork, Department of Epidemiology and Public Health<br>Murray, Deidre; University College Cork, Paediatrics and Child Health<br>Kiely, Mairead; University College Cork, Food and Nutritional Sciences<br>Hourihane, Jonathan; University College, Cork, Ireland, Paediatrics and Child Health<br>Baker, Philip ; University of Leicester, College of Medicine<br>Kenny, Louise; University College Cork, Obstetrics and Gynaecology |
| <b>Primary Subject Heading</b>: | Epidemiology                                                                                                                                                                                                                                                                                                                                                                                                                                                                                                                                                                                                                                                                                                               |
| Secondary Subject Heading:      | Obstetrics and gynaecology                                                                                                                                                                                                                                                                                                                                                                                                                                                                                                                                                                                                                                                                                                 |
| Keywords:                       | adiposity, exercise, pregnancy, PEAPOD                                                                                                                                                                                                                                                                                                                                                                                                                                                                                                                                                                                                                                                                                     |
|                                 |                                                                                                                                                                                                                                                                                                                                                                                                                                                                                                                                                                                                                                                                                                                            |

SCHOLARONE™  
Manuscripts

1  
2  
3 Changing levels of maternal exercise during pregnancy and neonatal adiposity: secondary analysis of  
4 the SCOPE/BASELINE birth cohort  
5

6  
7 **Norris, T.,<sup>1</sup> McCarthy, F.P.,<sup>2,3</sup> Khashan, A.S.,<sup>2,4</sup> Murray, D.M.,<sup>2,5</sup> Kiely, M.,<sup>2,6</sup> Hourihane, J. O'B.,<sup>2,5</sup>**  
8 **Baker, P.N.,<sup>7\*</sup> & Kenny, L.C.<sup>2\*</sup>**  
9

10  
11  
12  
13 <sup>1</sup>Department of Health Sciences, College of Medicine, Biological Sciences and Psychology, University  
14 of Leicester, Leicester, LE1 7RH. [Tel: 0116 252 5439](tel:01162525439) email: [tom.norris@le.ac.uk](mailto:tom.norris@le.ac.uk)  
15  
16

17 <sup>2</sup>The Irish Centre for Fetal and Neonatal Translational Research (INFANT), University College Cork,  
18 Cork University Maternity Hospital, Wilton, Cork, Ireland and  
19

20 <sup>3</sup>Division of Women's Health KCL, Women's Health Academic Centre KHP, St Thomas's Hospital,  
21 London.  
22  
23

24 <sup>4</sup>Department of Epidemiology and Public Health, University College Cork, Ireland  
25  
26

27 <sup>5</sup>Department of Paediatrics and Child Health, University College Cork  
28  
29

30 <sup>6</sup>Cork Centre for Vitamin D and Nutrition Research, School of Food and Nutritional Sciences,  
31 University College Cork  
32  
33

34 <sup>7</sup>College of Medicine, Biological Sciences and Psychology, University of Leicester, Leicester  
35  
36

37 (\*Joint senior authors)  
38

39 *on behalf of the SCOPE Ireland Cohort study and the Cork BASELINE Birth Cohort*  
40 *Study*  
41  
42  
43  
44  
45

46 Address for correspondence: Department of Health Sciences, College of Medicine, Biological  
47 Sciences and Psychology, University of Leicester, Leicester, LE1 7RH. [Tel: 0116 252 5439](tel:01162525439) email:  
48 [tom.norris@le.ac.uk](mailto:tom.norris@le.ac.uk)  
49  
50  
51  
52  
53  
54  
55  
56  
57  
58  
59  
60

**Abstract:**

**Objective:** To investigate whether changing levels of exercise during pregnancy are related to altered neonatal adiposity. **Design:** Secondary analysis of data from a prospective cohort study.

**Setting:** Cork, Ireland. **Participants:** 1200 mother-infant pairs recruited as part of a prospective birth cohort, Babies After SCOPE: Evaluating the Longitudinal Impact Using Neurological and Nutritional Endpoints (BASELINE). **Main outcome measures:** Neonatal adiposity was assessed within several days of birth using air displacement plethysmography (PEAPOD). BF% as a continuous outcome and a pair of dichotomous variables; high or low adiposity, representing BF% >90<sup>th</sup> or <10<sup>th</sup> centile, respectively. **Results:** Crude analysis revealed no effect of a changing level of exercise (since becoming pregnant) at 15 weeks' gestation. At 20 weeks' gestation, analyses revealed that relative to women who do not change their exercise level up to 20 weeks, those women who decreased their exercise level were more likely to give birth to a neonate with adiposity above the 90<sup>th</sup> centile (OR: 1.62; 95% CI:1.07; 2.46). This association was maintained after adjustment for putative confounders (OR: 1.62; 95% CI: 1.06; 2.47). **Conclusions:** We observed a possible sensitive period for the effect of changing exercise levels, with no effect observed with exercise recall for the first 15 weeks of gestation, but an effect of a decreasing level of exercise between 15 and 20 weeks. These results should be interpreted in line with the limitations of the study and further studies utilising objectively measured estimates of exercise are required in order to replicate these findings.

**Article Summary:***Strength and limitations of this study*

- Air displacement plethysmography (PEAPOD) was used to measure neonatal body composition
- Directed acyclic graphs (DAGs), based on an understanding of the causal network linking the variables in the analysis, were used to identify putative confounding variables
- Exercise variables were based on maternal self-report and therefore subject to recall bias
- Pre-pregnancy exercise data were not available, meaning we were unable to ascertain what pre-pregnancy exercise level women had changed from

**Introduction:**

In their 2006 guideline, the Royal College of Obstetricians and Gynaecologists (RCOG) concluded that pregnant women should be 'encouraged to initiate or continue exercise to derive the health benefits associated with such activities'.<sup>1</sup>

The benefits of physical activity during pregnancy are likely to operate through an increased blood flow and oxygenation to the fetus.<sup>2,3</sup> It has also been proposed that the impact of exercise on fetal growth is mediated by its effect on maternal insulin sensitivity, although a recent study has cast doubt on this.<sup>4</sup> Another mechanism by which exercise could exert its effect is via the functioning of the uteroplacental unit, for example by affecting placental function, volume and growth rates.<sup>5-7</sup> However, the apparent beneficial effects of exercise appear to be dependent upon the timing of when exercise is undertaken. For example, Clapp et al (2002) demonstrated that women who performed a high quantity of moderate exercise in early pregnancy and then cut back in late pregnancy (hi-lo) delivered offspring who were heavier and longer at birth, compared to offspring of women who either did moderate volumes in both early and late pregnancy or a low volume followed by a high volume (lo-hi). The hi-lo exercise regimen was also associated with a greater placental volume at delivery, relative to the other two groups,<sup>6</sup> presumably as a result of faster placental growth in early gestation. Those who either maintained moderate exercise or increased to a high volume of exercise in late gestation (relative to the hi-lo group) did not exhibit this increased placental volume at birth, suggesting that early gestation is a critical period for any exercise effects on placental development to be enacted, with a potentially suppressive effect in late gestation.<sup>2</sup> Furthermore, it has been reported that the transient changes in glucose regulation observed after bouts of exercise differ depending on when in pregnancy the exercise load is occurring, with increases in blood glucose observed after exercise early in pregnancy, but decreases in later pregnancy.<sup>8</sup> These fluctuations in nutrient supply, depending on the timing of exercise, could also contribute to differential effects on fetal growth.

1  
2  
3 The data surrounding the effects of physical activity on neonatal body composition (as opposed to  
4 size) from large scale observational studies is limited. Data from a limited number of relatively small  
5 randomised controlled trials report either a null or reducing effect of physical activity on neonatal  
6 adiposity,<sup>4 6 7</sup> with potentially greater effects if the exercise intervention is administered at later  
7 gestations. Findings from a recent observational study, the Healthy Start cohort (n=826), also  
8 suggested that increasing physical activity levels in later pregnancy could result in a reduction in  
9 neonatal adiposity, even after adjusting for putative confounders (e.g. maternal age, race or  
10 ethnicity, educational status, household income, pre-pregnancy BMI, and prenatal smoking status).<sup>9</sup>

11  
12 It is now well established that the *in utero* milieu experienced by the developing fetus could  
13 influence long-term risk for the development of obesity and obesity-related non-communicable  
14 diseases (OR-NCDs).<sup>10-12</sup> Maternal behaviour during this critical period of developmental plasticity  
15 has the potential to permanently alter susceptibility to later chronic disease via alterations in the  
16 offspring's metabolic and endocrinological phenotype.<sup>13-15</sup> Consequently, we hypothesise that  
17 maternal exercise in pregnancy is associated with neonatal adiposity. Any changes in neonatal  
18 adiposity could be indicative of an altered phenotypic profile in the offspring, which may increase  
19 susceptibility to later chronic disease.

20  
21 The objective of the current study was to investigate whether changes in maternal exercise during  
22 pregnancy were associated with offspring adiposity in the neonatal period, measured using air  
23 displacement plethysmography in a large homogeneous population.  
24  
25  
26  
27  
28  
29  
30  
31  
32  
33  
34  
35  
36  
37  
38  
39  
40  
41  
42  
43  
44  
45  
46  
47  
48  
49  
50  
51  
52  
53  
54  
55  
56  
57  
58  
59  
60

**Methods:**

Neonatal participants were recruited as part of the Cork BASELINE birth cohort study (ClinicalTrials.gov NCT: 01498965 [www.birthcohorts.net](http://www.birthcohorts.net))<sup>16</sup> between August 2008 and August 2011 from women who had participated in SCOPE (Screening for Pregnancy Endpoints) Ireland. SCOPE was a multicentre prospective cohort study with the aim of developing screening tests to predict various complications of pregnancy (e.g. pre-eclampsia, small-for-gestational-age (SGA) infants, and spontaneous preterm birth) (ACTRN12607000551493).<sup>17</sup> Methods are described in detail elsewhere.<sup>17 18</sup> In brief, participants were healthy nulliparous women with singleton pregnancies recruited antenatally between February 2007 and February 2011 in Cork, Ireland. Women were recruited, interviewed and all measurements obtained at 15±1 and 20±1 weeks' gestation.<sup>17 19</sup> Exclusion criteria included: a high risk for pre-eclampsia/delivery of a SGA neonate/spontaneous preterm birth because of underlying medical conditions; three or more previous miscarriages; three or more terminations of pregnancy; or having received interventions such as aspirin that might modify pregnancy outcome. At the time of interview, data were entered onto an internet-accessed central database with a complete audit trail designed and hosted by MedSciNet, Sweden. Participants were followed up prospectively, with pregnancy outcome data collected by trained research midwives.

Neonatal adiposity was assessed in the majority of neonates within 72 hours of birth by calculating neonatal body fat percentage (BF%) using the PEAPOD air displacement plethysmography. The mean time of measuring BF% in those infants born over 37 weeks' gestation was 1.8 days (standard deviation 0.97 days). Of those infants born <37 weeks' gestation, the mean time of testing was 2.4 days (standard deviation 1.2 days). Measurement of neonatal BF% involves direct measurement of body mass using precise scale and body volume in an airtight, enclosed chamber. Body composition assessment by densitometry involves the measurement of the density of the whole body. Body density is then used in a two-compartment model to calculate the percentage of fat, fat mass, and



1  
2  
3 fat-free mass.<sup>20</sup> The PEAPOD has excellent test-to-test reproducibility and is safe, non-invasive and  
4  
5 fast.<sup>21 22</sup>  
6  
7

8 Exercise data were collected at both the 15 and 20 week visits in a standardised manner. At both  
9  
10 time points, women were asked how many times per week they engaged in vigorous activity (which  
11  
12 made the woman breathe harder or puff or pant),<sup>23</sup> moderate activity (did not breathe harder or  
13  
14 puff or pant) or walking for recreation or exercise. At 15 weeks, women were asked: *'Has your level*  
15  
16 *of exercise (physical activity) changed since you've been pregnant?'*, to which they could respond  
17  
18 *'decreased', 'unchanged' or 'increased'*. At 20 weeks, women were then asked: *'Has your level of*  
19  
20 *exercise changed since last SCOPE visit?'*, with the same possible response options.  
21  
22

#### 23 *Statistical analysis:*

24  
25  
26 We used linear regression models to investigate the effect of changing levels of self-reported  
27  
28 maternal exercise during pregnancy on birthweight (g) and %BF measured as continuous variables.  
29  
30 For descriptive results, we generated a 'no exercise' binary variable with a value of 1 indicating  
31  
32 women who reported doing no vigorous nor moderate nor recreational walking activity per week.  
33  
34 Change in exercise levels was coded as a categorical variable: no change (reference group) versus  
35  
36 decreased versus increased. Regression diagnostics did not reveal any violations to linear regression  
37  
38 assumptions (i.e. normally distributed residuals and homogeneity of variance). We subsequently  
39  
40 generated separate binary variables (0=no; 1=yes) exercise on these dichotomous variables using  
41  
42 logistic regression models. Low and high adiposity was defined as below/above the gestational age-  
43  
44 and sex-specific 10<sup>th</sup>/90<sup>th</sup> adiposity centiles respectively, according to the centiles produced by  
45  
46 Hawkes et al (2011).<sup>24</sup> We performed sensitivity analyses limiting the sample to only those born at  
47  
48 term (n=1180) and separately, to those born non-low birthweight (>2500g) (n=1180) but effect  
49  
50 estimates did not markedly change and thus these infants were retained in the analysis.  
51  
52  
53 Furthermore, as the analysis sample was based on those that had complete data for the exposure,  
54  
55 outcome and covariates, we also performed sensitivity analyses to identify whether we had  
56  
57  
58  
59  
60

1  
2  
3 introduced a selection bias by only including those with complete data (supplementary tables 1 and  
4  
5 2).

6  
7  
8 In order to identify less biased associations between our exposures and outcome, we produced a  
9  
10 directed acyclic graph (DAG) using Daggity.<sup>25</sup> DAGs provide a method for formalising and clarifying  
11  
12 the causal hypothesised assumptions a researcher may make regarding the variables they wish to  
13  
14 analyse<sup>26</sup> and thus justify modelling choices.<sup>27 28</sup> These graphs are especially useful for identifying  
15  
16 variables which potentially confound the relationship between two variables, thus providing  
17  
18 researchers with sets of variables for which adjustment (and importantly non-adjustment) is  
19  
20 necessary, in order to obtain unbiased estimates of the relationship between a set of variables. For a  
21  
22 more detailed discussion on the use of these graphs in epidemiology, see Greenland, Pearl and  
23  
24 Robins.<sup>29</sup> Daggity is a web-based interface which allows researchers to construct and edit a directed  
25  
26 acyclic graph, with the ultimate aim of identifying sufficient sets of variables for adjustment which  
27  
28 will minimise bias when estimating the effect of an exposure on the outcome. The set of variables  
29  
30 identified by Daggity as necessary for adjustment were socioeconomic status, maternal  
31  
32 employment, smoking status, alcohol intake, body mass index (BMI) and level of education. These  
33  
34 variables were then incorporated into multivariable regression models. All analyses were conducted  
35  
36 in Stata/IC v14.1.  
37  
38  
39  
40  
41  
42  
43  
44  
45  
46  
47  
48  
49  
50  
51  
52  
53  
54  
55  
56  
57  
58  
59  
60

**Results:**

1258 neonates had PEAPOD measurements taken, of which 1200 had complete exposure, outcome and covariate data. Of these 1200, 612 (51.00%) were male and 98.25% (n=1 179) were of White European ethnic origin. The mean birthweight was 3510g (95% CI: 3484 - 3537) and the median gestational age was 40 weeks (interquartile range: 39 - 41).

*Change in exercise level reported in the first 15 weeks of pregnancy*

It is shown in Table 1 that at 15 weeks' gestation, more than a quarter (n=327, 27.25%) of women reported engaging in vigorous exercise at least once per week, with approximately three quarters reporting doing some form of moderate exercise per week (n=892, 74.33%). 104 (8.67%) women reported not engaging in any form of exercise per week.

Table 2 provides descriptive statistics for various maternal characteristics and neonatal outcomes, stratified by type of change of exercise in pregnancy. Compared to women who reported no change in exercise level, those who decreased their level of exercise were older (30.51 years (4.17) vs. 28.89 years (4.74)), with a higher level socioeconomic status (44.33 (16.15) vs. 39.10 (15.40)), less likely to have a household income below €21 000 (5.80% vs. 13.16%) and less likely to have smoked during the first trimester (6.03% vs. 15.90%). Compared to women who increased their exercise levels, no differences were observed in women who decreased their exercise levels, apart from a much lower likelihood of having a household income below €21 000 (5.80% vs. 17.07%).

The effect of changing exercise levels on birthweight and neonatal adiposity is shown in Table 3.

Relative to women who did not change their exercise level in pregnancy up to 15 weeks, there was no difference in any of the outcomes in those women who either increased or decreased their level of exercise, in both crude and adjusted analyses. Changing the reference group in order to compare those who decreased relative to those who increased also revealed no differences in neonatal outcomes.

Table 1: Descriptive statistics of self-reported activity levels at 15 and 20 weeks

|                                                          | Exercise level at 15 weeks (n=1200)                 | Exercise level at 20 weeks (n=1200) |                   |
|----------------------------------------------------------|-----------------------------------------------------|-------------------------------------|-------------------|
| Vigorous at least once per week (yes) (n; % of 1200)     | 327 (27.25)                                         | 377 (31.42)                         |                   |
| Moderate at least once per week (yes) (n; % of 1200)     | 892 (74.33)                                         | 908 (75.67)                         |                   |
| Recreational at least once per week (yes) (n; % of 1200) | 1040 (86.67)                                        | 1057 (88.08)                        |                   |
| No exercise per week (n; % of 1200)                      | 104 (8.67)                                          | 100 (8.33)                          |                   |
|                                                          | <i>Change in exercise level between 15-20 weeks</i> |                                     |                   |
|                                                          | Decreased (n=263)                                   | Unchanged (n=665)                   | Increased (n=272) |
| Any exercise per week at 15 weeks                        |                                                     |                                     |                   |
| No (n; % of column total)                                | 7 (2.66)                                            | 72 (10.83)                          | 25 (9.19)         |
| Yes (n; % of column total)                               | 256 (97.34)                                         | 593 (89.17)                         | 247 (90.81)       |

Table 2: Descriptive statistics in those with changing levels of physical activity during pregnancy

|                                                                   | Change in exercise level in pregnancy to 15 weeks (n=1200)     |                            |                   |
|-------------------------------------------------------------------|----------------------------------------------------------------|----------------------------|-------------------|
|                                                                   | Decreased (n=813)                                              | Unchanged (n=346)          | Increased (n=41)  |
| <b>Maternal characteristics:</b>                                  |                                                                |                            |                   |
| Maternal age (mean;SD)                                            | 30.51 (4.17) <sup>†</sup>                                      | 28.89 (4.74)               | 28.88 (5.19)      |
| Maternal BMI (mean;SD)                                            | 25.02 (4.12)                                                   | 24.49 (4.21)               | 24.18 (3.85)      |
| Maternal years schooling (mean;SD)                                | 13.27 (0.83)                                                   | 13.18 (0.81)               | 13.15 (0.73)      |
| Maternal socioeconomic status (mean;SD)                           | 44.33 (16.15) <sup>†</sup>                                     | 39.10 (15.40)              | 43.51 (16.35)     |
| Maternal household income <€21 000 (n:%)                          | 47 (5.80) <sup>†‡</sup>                                        | 45 (13.16)                 | 7 (17.07)         |
| Maternal smoking in 1 <sup>st</sup> trimester (n:%)               | 49 (6.03) <sup>†</sup>                                         | 55 (15.90)                 | 5 (12.20)         |
| Maternal alcohol intake in 1 <sup>st</sup> trimester (units/week) | 4.61 (5.76)                                                    | 5.39 (6.97)                | 5.99 (8.10)       |
| <b>Birth outcomes:</b>                                            |                                                                |                            |                   |
| Gestational age (weeks) (mean;SD)                                 | 40 (1.16)                                                      | 40 (1.24)                  | 40 (1.00)         |
| Birth weight (g) (mean;SD)                                        | 3525 (460)                                                     | 3471 (478)                 | 3541 (449)        |
| Neonatal adiposity (%) (mean;SD)                                  | 11.06 (4.15)                                                   | 11.03 (4.06)               | 11.22 (4.13)      |
| Adiposity<10 <sup>th</sup> centile (yes) (n:%)                    | 68 (8.36)                                                      | 26 (7.51)                  | 3 (7.32)          |
| Adiposity>90 <sup>th</sup> centile (yes) (n:%)                    | 86 (10.58)                                                     | 39 (11.27)                 | 7 (17.07)         |
|                                                                   | Change in exercise level in pregnancy: 15 to 20 weeks (n=1200) |                            |                   |
|                                                                   | Decreased (n=263)                                              | Unchanged (n=665)          | Increased (n=272) |
| <b>Maternal characteristics:</b>                                  |                                                                |                            |                   |
| Maternal age (mean;SD)                                            | 30.74 (4.13) <sup>†</sup>                                      | 29.52 (4.58) <sup>‡</sup>  | 30.39 (4.25)      |
| Maternal BMI (mean;SD)                                            | 25.07 (4.06)                                                   | 24.60 (4.01)               | 25.20 (4.52)      |
| Maternal years schooling                                          | 13.28 (0.72)                                                   | 13.23 (0.86)               | 13.22 (0.82)      |
| Maternal socioeconomic status                                     | 44.33 (15.49) <sup>†</sup>                                     | 40.96 (16.08) <sup>‡</sup> | 45.79 (16.21)     |
| Maternal household income <€21 000 (n:%)                          | 15 (5.70) <sup>†</sup>                                         | 66 (10.03)                 | 18 (6.62)         |
| Maternal smoking in 1 <sup>st</sup> trimester (n:%)               | 23 (8.75)                                                      | 73 (10.98) <sup>‡</sup>    | 13 (4.78)         |
| Maternal alcohol intake in 1 <sup>st</sup> trimester (units/week) | 4.91 (5.79)                                                    | 5.24 (6.82) <sup>‡</sup>   | 3.98 (5.01)       |
| <b>Birth outcomes:</b>                                            |                                                                |                            |                   |
| Gestational age (weeks) (mean;SD)                                 | 40 (1.20)                                                      | 40 (1.19)                  | 40 (1.14)         |
| Birth weight (g) (mean;SD)                                        | 3541 (498)                                                     | 3487 (458)                 | 3537 (448)        |
| Neonatal adiposity (%) (mean;SD)                                  | 11.44 (4.66)                                                   | 10.90 (4.02)               | 11.08 (3.79)      |
| Adiposity<10 <sup>th</sup> centile (yes) (n:%)                    | 22 (8.37)                                                      | 58 (8.87)                  | 16 (5.88)         |
| Adiposity>90 <sup>th</sup> centile (yes) (n:%)                    | 41 (15.59)                                                     | 68 (10.23)                 | 23 (8.46)         |

<sup>†</sup>different to 'unchanged' <sup>‡</sup>different to 'increased'

1  
2  
3 *Change in exercise level between 15 and 20 weeks*  
4

5  
6 At 20 weeks, similar levels of exercise were reported, with approximately 30% of women reporting  
7  
8 doing vigorous exercise at least once per week, and three quarters of the sample engaging in some  
9  
10 form of moderate exercise. Just over 8% of women reported taking part in no form of exercise at 20  
11  
12 weeks (Table 1). Table 1 also reveals that of the 665 women who reported no change in their  
13  
14 exercise levels between 15-20 weeks, approximately 10% of these (n=72) had engaged in no exercise  
15  
16 at 15 weeks. Similarly, of those who increased their exercise levels between 15-20 weeks, just under  
17  
18 10% (n=25) had reported no exercise at 15 weeks (Table 1).  
19

20  
21 Compared to women who reported no change in exercise level between 15 and 20 weeks, those  
22  
23 who decreased their level of exercise were older (30.74 years (4.13) vs. 29.52 years (4.58)), with a  
24  
25 higher level socioeconomic status (44.33 (15.49) vs. 40.96 (16.08)) and less likely to have a  
26  
27 household income below €21 000 (n=15 (5.70%) vs. n=66 (10.03%)). Women who increased their  
28  
29 exercise levels between 15 and 20 weeks, relative to those who reported no change, were also older  
30  
31 and with a higher SES, with a reduced alcohol intake (3.98 (5.01) units/week vs. 5.24 (6.82)  
32  
33 units/week) and lower likelihood of smoking during the 1<sup>st</sup> trimester (n=13 (4.78%) vs. n=73 (10.98%)  
34  
35 (Table 2).  
36  
37

38  
39 Crude analysis shows that relative to women who do not change their exercise level between 15 and  
40  
41 20 weeks, those women who decreased their exercise level were more likely to give birth to a  
42  
43 neonate with adiposity above the 90<sup>th</sup> centile (OR: 1.62; 95% CI: 1.07; 2.46) (Table 3). This association  
44  
45 was maintained after adjustment for the putative confounders (OR: 1.62; 95% CI: 1.06; 2.47). When  
46  
47 changing the reference group in order to compare women who decreased exercise levels relative to  
48  
49 those who increased exercise, it was observed that those who decreased were twice as likely to give  
50  
51 birth to a neonate with an adiposity above the 90<sup>th</sup> centile (OR: 2.00; 95% CI: 1.16 - 3.44), which  
52  
53 again was also maintained on adjustment (OR: 2.05; 95% CI: 1.19 - 3.55). Birthweight was not  
54  
55 associated with differences in exercise (Table 3).  
56  
57  
58  
59  
60

1  
2  
3 Compared to all of those enrolled without a PEADOD measurement (n=513) cohort, those enrolled  
4  
5 in Cork with a PEAPOD measurement taken (n=1258) were approximately 130g (95% CI: 80-190)  
6  
7 heavier and born approximately 2 days later (95% CI: 0.15-0.43), but with no differences in any  
8  
9 maternal biological or demographic data (Supplementary table 1). Although 1258 had PEAPOD  
10  
11 measurements taken, 58 infants were not included in the final analysis due to: all PEAPOD data  
12  
13 being lost/mis-entered (n=16), being born too early or late for adiposity centiles to be generated  
14  
15 (n=23) and having incomplete exposure and covariate data (19), leaving a final analysis sample of  
16  
17 1200. Compared to those with PEAPOD measurements but not in the final analysis sample, those  
18  
19 who were in the final analysis had higher birthweight (187.81; 95% CI: 64.45-311.17), but with no  
20  
21 differences in gestational age or any maternal biological or demographic data (Supplementary table  
22  
23  
24 2).

Table 3: Effect of changing exercise levels during pregnancy on neonatal adiposity

|                                      | Change in exercise level in pregnancy to 15 weeks (coefficient; 95%CI)     |             |                        |                         |             |                       |
|--------------------------------------|----------------------------------------------------------------------------|-------------|------------------------|-------------------------|-------------|-----------------------|
|                                      | <i>Crude</i>                                                               |             |                        | <i>Multivariable***</i> |             |                       |
|                                      | Decreased                                                                  | Unchanged   | Increased              | Decreased               | Unchanged   | Increased             |
| Birthweight (g)*                     | 54.39 (-4.16; 112.93)                                                      | (reference) | 70.24 (-80.40; 220.89) | 22.10 (-37.27; 81.48)   | (reference) | 74.10 (-37.27; 81.48) |
| Neonatal adiposity (%)*              | 0.03 (-0.49; 0.55)                                                         | (reference) | 0.19 (-1.15; 1.53)     | -0.01 (-0.54; 0.52)     | (reference) | 0.33 (-1.01; 1.67)    |
| Adiposity<10 <sup>th</sup> centile** | 1.12 (0.70; 1.80)                                                          | (reference) | 0.97 (0.28; 3.36)      | 1.21 (0.74; 1.97)       | (reference) | 0.81 (0.23; 2.89)     |
| Adiposity>90 <sup>th</sup> centile** | 0.93 (0.62; 1.39)                                                          | (reference) | 1.62 (0.67; 3.90)      | 0.93 (0.62; 1.41)       | (reference) | 1.75 (0.71; 4.30)     |
|                                      | Change in exercise level in pregnancy: 15 to 20 weeks (coefficient; 95%CI) |             |                        |                         |             |                       |
|                                      | <i>Crude</i>                                                               |             |                        | <i>Multivariable***</i> |             |                       |
|                                      | Decreased                                                                  | Unchanged   | Increased              | Decreased               | Unchanged   | Increased             |
| Birthweight (g)*                     | 54.47 (-11.96; 120.90)                                                     | (reference) | 50.11 (-15.53; 115.75) | 42.59 (-23.45; 108.62)  | (reference) | 22.29 (-43.44; 88.01) |
| Neonatal adiposity (%)*              | 0.54 (-0.05; 1.13)                                                         | (reference) | 0.18 (-0.40; 0.76)     | 0.53 (-0.06; 1.12)      | (reference) | 0.12 (-0.46; 0.71)    |
| Adiposity<10 <sup>th</sup> centile** | 0.94 (0.56; 1.56)                                                          | (reference) | 0.64 (0.36; 1.14)      | 0.96 (0.57; 1.61)       | (reference) | 0.70 (0.39; 1.25)     |
| Adiposity>90 <sup>th</sup> centile** | 1.62 (1.07; 2.46)                                                          | (reference) | 0.81 (0.49; 1.33)      | 1.62 (1.06; 2.47)       | (reference) | 0.79 (0.48; 1.31)     |

\*Linear regression for continuous outcomes (β); \*\*logistic regression for dichotomous outcomes (OR) \*\*\*adjusted for: socioeconomic status, years of schooling, employment status, maternal BMI, smoking in 1st trimester, alcohol intake in 1st trimester



## Discussion

In this cohort of white European mother-offspring pairs, we report the effect of changing levels of exercise during pregnancy and neonatal adiposity measured using air displacement plethysmography (PEAPOD). We observed that pregnant women who reported a decrease in exercise levels between 15 and 20 weeks, had a 60% higher risk of having a baby with adiposity above the 90<sup>th</sup> centile when compared with women who reported no change. This risk was approximately double (OR: 2.00; 95% CI: 1.16 - 3.44) when women who reported a decrease in exercise levels between 15 and 20 weeks were compared to women who reported an increase in exercise levels. This association was maintained after adjustment for a set of putative confounders including maternal education, employment status, smoking, alcohol intake, BMI and socioeconomic status. The exercise effect was only apparent between 15 and 20 weeks and not for changing exercise levels prior to 15 weeks, raising the possibility that there is a potential sensitive period with regard to the effect of a change on exercise level on the development of offspring adiposity.

A major strength of the study is the use of air-displacement plethysmography for the estimates of body composition. This method is a quick, safe and non-invasive technique, which has shown to be a reliable and accurate instrument for determining body fat percentage in infants.<sup>21 30 31</sup> As such, it has been deemed the primary method for measuring body density in paediatric populations.<sup>32</sup> Inter-observer variability was reduced by having one trained midwife perform almost all of the measurements. However, repeated measurements were not performed and thus we were unable to assess intra-observer variability. The prospective design of the cohort, allowing us to comprehend the temporal relationship between variables and the rich collection of covariates available for adjustment further strengthens the study. Another strength of this study is the use of a directed acyclic graph (DAG) which is based on an understanding of the causal network linking the variables in the analysis. As such, the DAG allows for the appropriate adjustment for a set of putative confounders in order to obtain a less biased estimate of the effect of changing levels of exercise on neonatal adiposity. We are, however, cautious not to refer to any effect as 'causal' as we cannot

1  
2  
3 exclude the possibility of the presence of both residual confounding and, in particular with this  
4  
5 subjective measurement of exercise, measurement error.  
6  
7

8 Arguably the greatest limitation is the subjective nature of the exercise variables, which were based  
9  
10 on maternal report. Whilst the recall period was relatively short (5-15 weeks), and reduced the  
11  
12 potential effect of any recall bias, an objectively measured assessment of physical activity (e.g. an  
13  
14 accelerometer), which is not subject to any recall bias, would have more optimally identified  
15  
16 whether changes in exercise had occurred. Nonetheless, in large-scale cohort studies a compromise  
17  
18 is often sought, with participant burden and cost-effectiveness on the one side and a more precisely  
19  
20 measured variable on the other. Furthermore, it has been reported that pregnant women may wear  
21  
22 monitors placed at the hip incorrectly due to changes in their girth.<sup>33 34</sup> Accordingly, a recent  
23  
24 systematic review found that in epidemiological studies amongst pregnant women, self-reported  
25  
26 physical activity measures were the most common assessment method.<sup>35</sup> Research on agreement  
27  
28 between subjective estimates of physical activity and objectives measures has generated mixed  
29  
30 results,<sup>36 37</sup> with the same systematic review concluding that the agreement between questionnaires  
31  
32 and objective measures of physical activity assessment, ranged from 'poor to substantial'.<sup>35</sup>  
33  
34  
35

36 A related limitation is that, as recruitment commenced during pregnancy, pre-pregnancy exercise  
37  
38 data was not available and as a result we were unable to determine what pre-pregnancy exercise  
39  
40 level women had changed from. It could be speculated that women who reported no change in  
41  
42 activity level at 15 weeks did not do any exercise to start with. We have shown that those women  
43  
44 whose activity remained unchanged at 15 weeks (compared to those who decreased) were more  
45  
46 likely to smoke during the first trimester, be of lower socioeconomic status and more likely to have a  
47  
48 lower household income, all of which are associated with reduced levels of exercise and fetal  
49  
50 growth. Whilst we adjusted for these confounding factors, the lack of baseline activity limits the  
51  
52 interpretability of our findings. For example, it would have been interesting to determine whether  
53  
54  
55  
56  
57  
58  
59  
60

1  
2  
3 the effect of a decreasing exercise level (vs. unchanged level) was the same across differing  
4  
5 categories of baseline activity.  
6

7  
8 A final limitation is the potential lack of generalisability of our results to other groups. For example,  
9  
10 study recruitment was limited to primiparous women with singleton pregnancies and notably, a  
11  
12 majority of White European gravidas (approximately 98.25%) were recruited into the study. This  
13  
14 predominance of White European gravidas does, however, reflect the demographic profile of  
15  
16 females aged 15 to 44 in Ireland as a whole (95%).<sup>38</sup> Unfortunately, a number of infants (513/1771)  
17  
18 were unable to have a body composition assessment. Possible reasons for this include a lag period  
19  
20 between the start of the study and the arrival of the PEAPOD, and admittance of the infant to the  
21  
22 neonatal intensive care unit (NICU). Whilst this this will have reduced the statistical power of the  
23  
24 study, we have shown that although these infants differed slightly in terms of birthweight (median  
25  
26 difference: 130g; 95% CI: 80-190g) and gestational age (median difference: 0.29 weeks; 95% CI: 0.15  
27  
28 - 0.43 weeks), there were no differences in the maternal characteristics of those with and without a  
29  
30 PEAPOD measurement (supplementary table 1), and thus we are confident we have not introduced  
31  
32 a substantial selection bias into the analysis. The employment of a complete-case analysis could also  
33  
34 have introduced a degree of selection bias into the analysis, however, supplementary table 2 shows  
35  
36 that, apart from birthweight, there no differences in the offspring or maternal characteristics of  
37  
38 those with complete vs. incomplete data. A complete case analysis would, however, reduce the  
39  
40 statistical power of the analysis.  
41  
42  
43  
44

45 To the authors' knowledge, this is the first study looking at the effect of changing exercise levels in  
46  
47 pregnancy on neonatal adiposity using air displacement plethysmography. Previous studies have  
48  
49 either used different measurement techniques (sum of skinfolds<sup>67</sup> or dual-energy x-ray  
50  
51 absorptiometry (DXA)<sup>4</sup>) or were not looking at changing levels of exercise.<sup>9</sup> A recent large  
52  
53 observational study observed that the lowest quartile of late-pregnancy energy expenditure was  
54  
55 associated with a substantially higher neonatal fat mass (290.5g vs 249.4g, p=0.03) within the first  
56  
57  
58  
59  
60

1  
2  
3 72-hours, which was not mirrored in neonatal fat-free mass<sup>9</sup>. Unlike our study, however, no  
4  
5 differences were observed in either mid- or early pregnancy. However, the study of Harrod et al<sup>9</sup>  
6  
7 was not investigating intra-pregnancy change and also relied on a statistically driven method to  
8  
9 identify potential confounders, ignoring the causal framework underpinning any possible  
10  
11 associations. We observed a possible sensitive period for the effect of changing exercise levels, with  
12  
13 no effect observed with exercise recall for the first 15 weeks of gestation, but an effect of a  
14  
15 decreasing level of exercise between 15 and 20 weeks. This provides support for the findings of  
16  
17 Clapp et al,<sup>6</sup> who found that women who performed a high volume of moderate exercise in early  
18  
19 pregnancy and then cut back in late pregnancy delivered offspring who were heavier and longer at  
20  
21 birth, compared to offspring of women who either did moderate volumes in both early and late  
22  
23 pregnancy or a low volume followed by a high volume.<sup>6</sup> Indeed in our study we observed a markedly  
24  
25 increased risk of delivering an infant with neonatal adiposity above the 90<sup>th</sup> centile in pregnant  
26  
27 women who reported having increased their exercise levels up to 15 weeks, but then reported a  
28  
29 decrease between 15 and 20 weeks, relative to those who reported no change at both time points  
30  
31 (OR: 5.87; 95% CI: 1.74-19.80, data not shown), though the uncertainty of this estimate can be  
32  
33 observed in the wide confidence interval, reflecting the small number of women on which this  
34  
35 finding was based.  
36  
37  
38  
39

40 Further studies utilising objectively measured estimates of physical activity in a range of different  
41  
42 population groups are required in order to replicate this finding. For example, the cohort of women  
43  
44 in this analysis exhibited relatively low levels of activity, with almost 75% of women never doing any  
45  
46 vigorous activity at 15 weeks and only approximately 50% of the women doing moderate activity  
47  
48 more than once a week. If results appear consistent and robust to these differences in methodology  
49  
50 and population, then these findings have significant implications, which extend beyond the short-  
51  
52 term. However, the lack of follow-up studies with body composition assessment at birth limits our  
53  
54 ability to explicitly link increased adiposity and later risk. Nonetheless, if the effects of a reduced  
55  
56 level of exercise are able to manifest in the offspring as an altered adiposity at birth, the wider  
57  
58  
59  
60

1  
2  
3 implication is that, during this critical period of developmental plasticity, some sort of programing  
4  
5 has occurred, potentially permanently altering the offspring's metabolic and endocrinological  
6  
7 phenotype (13-15),<sup>13-15</sup> and altering its long-term susceptibility to a variety of non-communicable  
8  
9 diseases (NCDs). It is hoped that with the increasing incorporation of body composition assessment  
10  
11 methods in infancy, particularly air-displacement plethysmography, these questions will be able to  
12  
13 be investigated.

#### 14 15 16 17 **Conclusion:**

18  
19 A decreasing level of maternal reported exercise between 15 and 20 weeks' gestation was  
20  
21 associated with an increased risk of delivering an infant with a high adiposity. This effect was  
22  
23 maintained after appropriate adjustment for confounding variables as identified using knowledge of  
24  
25 the causal network. However, these findings need interpreting in line with the limitations of the  
26  
27 study. Accordingly, further research utilising objective measures of physical activity and in different  
28  
29 populations needs to be conducted in order to validate results.

#### 30 31 32 33 **Acknowledgements:**

34  
35 We thank the pregnant women who participated in the SCOPE study and the mothers who allowed  
36  
37 their newborn infants to participate in the BASELINE study.

#### 38 39 40 41 **Funding:**

42  
43 SCOPE Ireland was funded by the Health Research Board, Ireland (CSA 2007/2). The BASELINE cohort  
44  
45 was supported by the National Children's Research Centre, Dublin, Ireland, and the Food Standards  
46  
47 Agency of the United Kingdom (grant no. TO7060). SCOPE and BASELINE are supported by INFANT,  
48  
49 an SFI funded Research Centre (grant no 12/RC/2272). The funders had no involvement in the study  
50  
51 design, data collection, analysis and interpretation, as well as in the writing of the manuscript.

#### 52 53 54 55 56 **Competing interests:**

1  
2  
3 None declared.  
4  
5

6 **Contribution to authorship:**  
7

8 LCK is guarantor. TN designed the study, analysed and interpreted the data, alongside LCK and PNB.  
9

10 TN, AK, FMC, DMM, MK, J O'B H, LCK and PNB took part in drafting the article or revising it for  
11  
12 critically important intellectual content and all gave final approval of the version to be published.  
13  
14

15 **Ethics approval:**  
16

17  
18 Ethical approval was obtained from the local ethics committees (Cork ECM5(10)05/02/08; approved  
19  
20 5 February 2008) and all women provided written informed consent.  
21  
22

23 **Data sharing statement:** There are no additional data available.  
24  
25  
26  
27  
28  
29  
30  
31  
32  
33  
34  
35  
36  
37  
38  
39  
40  
41  
42  
43  
44  
45  
46  
47  
48  
49  
50  
51  
52  
53  
54  
55  
56  
57  
58  
59  
60

## References

1. Royal College of Obstetricians and Gynaecologists. Exercise in Pregnancy. RCOG Statement No 4, 2006.
2. Hopkins SA, Cutfield WS. Exercise in pregnancy: weighing up the long-term impact on the next generation. *Exercise and sport sciences reviews* 2011;**39**(3):120-27.
3. Pivarnik JM, Mauer MB, Ayres NA, et al. Effects of chronic exercise on blood volume expansion and hematologic indices during pregnancy. *Obstetrics & Gynecology* 1994;**83**(2):265-69.
4. Hopkins SA, Baldi JC, Cutfield WS, et al. Exercise training in pregnancy reduces offspring size without changes in maternal insulin sensitivity. *The Journal of Clinical Endocrinology & Metabolism* 2010;**95**(5):2080-88.
5. Jackson M, Gott P, Lye S, et al. The effects of maternal aerobic exercise on human placental development: placental volumetric composition and surface areas. *Placenta* 1995;**16**(2):179-91.
6. Clapp JF, Kim H, Burciu B, et al. Continuing regular exercise during pregnancy: effect of exercise volume on fetoplacental growth. *American journal of obstetrics and gynecology* 2002;**186**(1):142-47.
7. Clapp JF, Kim H, Burciu B, et al. Beginning regular exercise in early pregnancy: effect on fetoplacental growth. *American journal of obstetrics and gynecology* 2000;**183**(6):1484-88.
8. Clapp JF, Capeless EL. The changing glycemic response to exercise during pregnancy. *American journal of obstetrics and gynecology* 1991;**165**(6):1678-83.
9. Harrod CS, Chasan-Taber L, Reynolds RM, et al. Physical activity in pregnancy and neonatal body composition: the Healthy Start study. *Obstetrics and gynecology* 2014;**124**(2 Pt 1):257-64.
10. Barker DJ, Godfrey KM, Gluckman PD, et al. Fetal nutrition and cardiovascular disease in adult life. *The Lancet* 1993;**341**(8850):938-41.
11. Barker D, Osmond C, Golding J, et al. Growth in utero, blood pressure in childhood and adult life, and mortality from cardiovascular disease. *Bmj* 1989;**298**(6673):564-67.
12. Martyn C, Barker D, Osmond C. Mothers' pelvic size, fetal growth, and death from stroke and coronary heart disease in men in the UK. *The Lancet* 1996;**348**(9037):1264-68.
13. Ravelli G-P, Stein ZA, Susser MW. Obesity in young men after famine exposure in utero and early infancy. *New England Journal of Medicine* 1976;**295**(7):349-53.
14. Hales CN, Barker DJ. Type 2 (non-insulin-dependent) diabetes mellitus: the thrifty phenotype hypothesis. *Diabetologia* 1992;**35**(7):595-601.
15. Phillips D. Relation of fetal growth to adult muscle mass and glucose tolerance. *Diabetic medicine* 1995;**12**(8):686-90.
16. O'Donovan SM, Murray DM, Hourihane JOB, et al. Cohort profile: the Cork BASELINE Birth Cohort Study: babies after SCOPE: evaluating the longitudinal impact on neurological and nutritional endpoints. *International journal of epidemiology* 2015;**44**(3):764-75.
17. North RA, McCowan LM, Dekker GA, et al. Clinical risk prediction for pre-eclampsia in nulliparous women: development of model in international prospective cohort. *Bmj* 2011;**342**:d1875.
18. McCarthy FP, Khashan AS, North RA, et al. A prospective cohort study investigating associations between hyperemesis gravidarum and cognitive, behavioural and emotional well-being in pregnancy. *PloS one* 2011;**6**(11):e27678.
19. McCowan LM, Dekker GA, Chan E, et al. Spontaneous preterm birth and small for gestational age infants in women who stop smoking early in pregnancy: prospective cohort study. *Bmj* 2009;**338**:b1081.
20. Orlando A, Dempster P, Aitkens S. A new air displacement plethysmograph for the measurement of body composition in infants. *Pediatric research* 2003;**53**(3):486-92.
21. Ellis KJ, Yao, M., Shypailo, R.J., Orlando, A., Wong, W.W., Heird, W.C. Body-composition assessment in infancy: air-displacement plethysmography compared with a reference 4-compartment model. *American Journal of Clinical Nutrition* 2007;**85**(1):5.

- 1
  - 2
  - 3
  - 4
  - 5
  - 6
  - 7
  - 8
  - 9
  - 10
  - 11
  - 12
  - 13
  - 14
  - 15
  - 16
  - 17
  - 18
  - 19
  - 20
  - 21
  - 22
  - 23
  - 24
  - 25
  - 26
  - 27
  - 28
  - 29
  - 30
  - 31
  - 32
  - 33
  - 34
  - 35
  - 36
  - 37
  - 38
  - 39
  - 40
  - 41
  - 42
  - 43
  - 44
  - 45
  - 46
  - 47
  - 48
  - 49
  - 50
  - 51
  - 52
  - 53
  - 54
  - 55
  - 56
  - 57
  - 58
  - 59
  - 60
22. Roggero P, Gianni ML, Amato O, et al. Evaluation of air-displacement plethysmography for body composition assessment in preterm infants. *Pediatric research* 2012;**72**(3):316-20.
23. Bell RJ, Palma SM, Lumley JM. The Effect of Vigorous Exercise During Pregnancy on Birth-Weight. *Australian and New Zealand journal of obstetrics and gynaecology* 1995;**35**(1):46-51.
24. Hawkes CP, Hourihane JOB, Kenny LC, et al. Gender-and gestational age-specific body fat percentage at birth. *Pediatrics* 2011;**128**(3):e645-e51.
25. Textor J, Hardt J, Knüppel S. DAGitty: a graphical tool for analyzing causal diagrams. *Epidemiology* 2011;**22**(5):745.
26. Moodie EE, Stephens D. Using directed acyclic graphs to detect limitations of traditional regression in longitudinal studies. *International journal of public health* 2010;**55**(6):701-03.
27. Bodnar LM, Davidian M, Siega-Riz AM, et al. Marginal structural models for analyzing causal effects of time-dependent treatments: an application in perinatal epidemiology. *American Journal of Epidemiology* 2004;**159**(10):926-34.
28. Brotman RM, Klebanoff MA, Nansel TR, et al. A longitudinal study of vaginal douching and bacterial vaginosis—a marginal structural modeling analysis. *American journal of epidemiology* 2008;**168**(2):188-96.
29. Greenland S, Pearl J, Robins JM. Causal diagrams for epidemiologic research. *Epidemiology* 1999:37-48.
30. Ma G, Yao M, Liu Y, et al. Validation of a new pediatric air-displacement plethysmograph for assessing body composition in infants. *The American journal of clinical nutrition* 2004;**79**(4):653-60.
31. Yao M, Nommsen-Rivers L, Dewey K, et al. Preliminary evaluation of a new pediatric air displacement plethysmograph for body composition assessment in infants. *Acta diabetologica* 2003;**40**(1):s55-s58.
32. Agency IAE. *Body Composition Assessment from Birth to Two Years of Age*. IAEA Human Health Series. Vienna, 2013.
33. DiNallo JM, Downs DS, Masurier GL. Objectively assessing treadmill walking during the second and third pregnancy trimesters. *Journal of Physical Activity and Health* 2012;**9**(1):21-28.
34. Connolly CP, Coe, D., Kendrick, J.M., Bassett, D. & Thompson, D.L. Accuracy of Physical Activity Monitors in Pregnant Women. *Medicine and science in sports and exercise* 2010;**43**(6):1100-05.
35. Evenson KR, Chasan-Taber L, Symons Downs D, et al. Review of Self-reported Physical Activity Assessments for Pregnancy: Summary of the Evidence for Validity and Reliability. *Paediatric and perinatal epidemiology* 2012;**26**(5):479-94.
36. Harrison CL, Thompson RG, Teede HJ, et al. Measuring physical activity during pregnancy. *International Journal of Behavioral Nutrition and Physical Activity* 2011;**8**(1):1.
37. Evenson KR, Wen F. Measuring physical activity among pregnant women using a structured one-week recall questionnaire: evidence for validity and reliability. *International Journal of Behavioral Nutrition and Physical Activity* 2010;**7**(1):1.
38. Central Statistics Office Government of Ireland. *Census 2006 Volume 5- Ethnic or Cultural Background (including the Irish Traveller Community)*, 2007.



Supplementary table 1: Descriptive results for those vs those without PEAPOD measurements

|                                                                       | With PEAPOD<br>(n=1258) | Without PEAPOD<br>(n=513) | Difference (Cork_with<br>– Cork_without) (95%<br>CI) |
|-----------------------------------------------------------------------|-------------------------|---------------------------|------------------------------------------------------|
| Sex of infant (% (n) female)                                          | 48.57 (611)             | 50.68 (260)               | -2.11 (-7.25; 3.02)*                                 |
| Birth weight (g) (median;IQR)                                         | 3500 (3180;3800)        | 3380 (3020;3730)          | 130 (80;190)**                                       |
| Gestational age (weeks) (median;IQR)                                  | 40.29 (39.43;41)        | 40 (38.71;40.86)          | 0.29 (0.15;0.43)**                                   |
| Maternal age (years) (mean:SD)                                        | 29.95 (4.44)            | 29.88 (4.61)              | 0.07 (-0.39;0.53)**                                  |
| Maternal BMI (kg/m <sup>2</sup> ) (median;IQR)                        | 23.9 (22;26.9)          | 24 (22;26.9)              | -0.1 (-0.30;0.50)**                                  |
| Maternal Socioeconomic status (median;IQR)                            | 45 (29;51)              | 45 (29;50)                | 0 (-1;0)**                                           |
| Maternal schooling (years) (median;IQR)                               | 13 (13;14)              | 13 (13;14)                | 0 (0;0)**                                            |
| Household income (<€21 000) (yes)(% (n))                              | 8.47 (106)              | 8.22 (42)                 | 0.25 (-2.58;3.10)*                                   |
| Maternal unemployment (yes) (% (n))                                   | 5.56 (70)               | 3.51 (18)                 | 2.06 (0.02;4.09)*                                    |
| 1 <sup>st</sup> trimester smoking (yes) (% (n))                       | 9.30 (117)              | 11.70 (60)                | -2.40 (-5.60;0.82)*                                  |
| 1 <sup>st</sup> trimester alcohol intake (units/week)<br>(median;IQR) | 3 (0.6;7)               | 2.8 (0.62;5)              | 0 (-0.5;0)**                                         |

\*tests for proportions for categorical variables (% difference); \*\*t-tests/Wilcoxon rank-sum for continuous variables (difference in means/medians)

Supplementary table 2: Descriptive results for those with vs those without complete data

|                                                                       | Complete data group<br>(n=1200) | Missing data group<br>(n=58) | Difference (Complete –<br>incomplete)<br>(95% CI) |
|-----------------------------------------------------------------------|---------------------------------|------------------------------|---------------------------------------------------|
| Sex of infant (% (n) female)                                          | 49.00 (588)                     | 39.66 (23)                   | 9.34 (-3.56;22.25)*                               |
| Birth weight (g) (mean;SD)                                            | 3510 (465)                      | 3322 (518)                   | 188 (64;311)**                                    |
| Gestational age (weeks) (median;IQR)                                  | 40.29 (39.43;41.00)             | 40.57 (39.29;42.00)          | -0.43 (-0.86;0.15)**                              |
| Maternal age (years) (mean;SD)                                        | 29.98 (4.44)                    | 29.13 (4.54)                 | 0.85 (-0.33;2.02)**                               |
| Maternal BMI (kg/m <sup>2</sup> ) (median;IQR)                        | 23.9 (22.00;26.8)               | 24.7 (22.00;29.00)           | -0.70 (-1.90;0.40)**                              |
| Maternal Socioeconomic status (median;IQR)                            | 45 (29;51.00)                   | 44.5 (29;50.00)              | 0 (-3.00;4.00)**                                  |
| Maternal schooling (years) (median;IQR)                               | 13 (13;14)                      | 13 (13;14)                   | 0 (0;0)**                                         |
| Household income <€21 000 (yes) (% (n))                               | 8.30 (99)                       | 12.07 (7)                    | -3.77 (-12.30; 4.76)*                             |
| Maternal unemployment (yes) (% (n))                                   | 5.50 (66)                       | 6.90 (4)                     | -1.40 (-8.04;5.25)*                               |
| 1 <sup>st</sup> trimester smoking (yes) (% (n))                       | 9.08 (109)                      | 13.79 (8)                    | -4.71 (-13.73;4.31)*                              |
| 1 <sup>st</sup> trimester alcohol intake (units/week)<br>(median;IQR) | 3 (0.6;7)                       | 3 (0.6;10)                   | -0.10 (-1.5;0.67)**                               |

\*tests for proportions for categorical variables (% difference); \*\*t-tests/Wilcoxon rank-sum for continuous variables (difference in means/medians)

1  
2  
3  
4  
5  
6  
7  
8  
9  
10  
11  
12  
13  
14  
15  
16  
17  
18  
19  
20  
21  
22  
23  
24  
25  
26  
27  
28  
29  
30  
31  
32  
33  
34  
35  
36  
37  
38  
39  
40  
41  
42  
43  
44  
45  
46  
47  
48  
49

For peer review only

## STROBE Statement—checklist of items that should be included in reports of observational studies

|                              | Item No | Recommendation                                                                                                                                                                                                                                                                                                                                                                                                                                                         | Page |
|------------------------------|---------|------------------------------------------------------------------------------------------------------------------------------------------------------------------------------------------------------------------------------------------------------------------------------------------------------------------------------------------------------------------------------------------------------------------------------------------------------------------------|------|
| <b>Title and abstract</b>    | 1       | (a) Indicate the study's design with a commonly used term in the title or the abstract                                                                                                                                                                                                                                                                                                                                                                                 | 1    |
|                              |         | (b) Provide in the abstract an informative and balanced summary of what was done and what was found                                                                                                                                                                                                                                                                                                                                                                    | 2    |
| <b>Introduction</b>          |         |                                                                                                                                                                                                                                                                                                                                                                                                                                                                        |      |
| Background/rationale         | 2       | Explain the scientific background and rationale for the investigation being reported                                                                                                                                                                                                                                                                                                                                                                                   | 4    |
| Objectives                   | 3       | State specific objectives, including any prespecified hypotheses                                                                                                                                                                                                                                                                                                                                                                                                       | 5    |
| <b>Methods</b>               |         |                                                                                                                                                                                                                                                                                                                                                                                                                                                                        |      |
| Study design                 | 4       | Present key elements of study design early in the paper                                                                                                                                                                                                                                                                                                                                                                                                                | 6    |
| Setting                      | 5       | Describe the setting, locations, and relevant dates, including periods of recruitment, exposure, follow-up, and data collection                                                                                                                                                                                                                                                                                                                                        | 6    |
| Participants                 | 6       | (a) <i>Cohort study</i> —Give the eligibility criteria, and the sources and methods of selection of participants. Describe methods of follow-up<br><i>Case-control study</i> —Give the eligibility criteria, and the sources and methods of case ascertainment and control selection. Give the rationale for the choice of cases and controls<br><i>Cross-sectional study</i> —Give the eligibility criteria, and the sources and methods of selection of participants | 6    |
|                              |         | (b) <i>Cohort study</i> —For matched studies, give matching criteria and number of exposed and unexposed<br><i>Case-control study</i> —For matched studies, give matching criteria and the number of controls per case                                                                                                                                                                                                                                                 |      |
| Variables                    | 7       | Clearly define all outcomes, exposures, predictors, potential confounders, and effect modifiers. Give diagnostic criteria, if applicable                                                                                                                                                                                                                                                                                                                               | 6-8  |
| Data sources/<br>measurement | 8*      | For each variable of interest, give sources of data and details of methods of assessment (measurement). Describe comparability of assessment methods if there is more than one group                                                                                                                                                                                                                                                                                   | 6-7  |
| Bias                         | 9       | Describe any efforts to address potential sources of bias                                                                                                                                                                                                                                                                                                                                                                                                              | 7-8  |
| Study size                   | 10      | Explain how the study size was arrived at                                                                                                                                                                                                                                                                                                                                                                                                                              | 9    |
| Quantitative variables       | 11      | Explain how quantitative variables were handled in the analyses. If applicable, describe which groupings were chosen and why                                                                                                                                                                                                                                                                                                                                           | 7    |
| Statistical methods          | 12      | (a) Describe all statistical methods, including those used to control for confounding                                                                                                                                                                                                                                                                                                                                                                                  | 7-8  |
|                              |         | (b) Describe any methods used to examine subgroups and interactions                                                                                                                                                                                                                                                                                                                                                                                                    | 7    |
|                              |         | (c) Explain how missing data were addressed                                                                                                                                                                                                                                                                                                                                                                                                                            | 7    |
|                              |         | (d) <i>Cohort study</i> —If applicable, explain how loss to follow-up was addressed<br><i>Case-control study</i> —If applicable, explain how matching of cases and controls was addressed<br><i>Cross-sectional study</i> —If applicable, describe analytical methods taking account of sampling strategy                                                                                                                                                              |      |

1  
2  
3  
4  
5  
6  
7  
8  
9  
10  
11  
12  
13  
14  
15  
16  
17  
18  
19  
20  
21  
22  
23  
24  
25  
26  
27  
28  
29  
30  
31  
32  
33  
34  
35  
36  
37  
38  
39  
40  
41  
42  
43  
44  
45  
46  
47  
48  
49  
50  
51  
52  
53  
54  
55  
56  
57  
58  
59  
60

(e) Describe any sensitivity analyses

Continued on next page

For peer review only

| <b>Results</b>           |                                                                                                                                                                                                                                                                                                                                                                                                                  | <b>Page</b> |
|--------------------------|------------------------------------------------------------------------------------------------------------------------------------------------------------------------------------------------------------------------------------------------------------------------------------------------------------------------------------------------------------------------------------------------------------------|-------------|
| Participants             | 13* (a) Report numbers of individuals at each stage of study—eg numbers potentially eligible, examined for eligibility, confirmed eligible, included in the study, completing follow-up, and analysed<br>(b) Give reasons for non-participation at each stage<br>(c) Consider use of a flow diagram                                                                                                              | 9           |
| Descriptive data         | 14* (a) Give characteristics of study participants (eg demographic, clinical, social) and information on exposures and potential confounders<br>(b) Indicate number of participants with missing data for each variable of interest<br>(c) <i>Cohort study</i> —Summarise follow-up time (eg, average and total amount)                                                                                          | 9,11        |
| Outcome data             | 15* <i>Cohort study</i> —Report numbers of outcome events or summary measures over time<br><i>Case-control study</i> —Report numbers in each exposure category, or summary measures of exposure<br><i>Cross-sectional study</i> —Report numbers of outcome events or summary measures                                                                                                                            | 9           |
| Main results             | 16 (a) Give unadjusted estimates and, if applicable, confounder-adjusted estimates and their precision (eg, 95% confidence interval). Make clear which confounders were adjusted for and why they were included<br>(b) Report category boundaries when continuous variables were categorized<br>(c) If relevant, consider translating estimates of relative risk into absolute risk for a meaningful time period | 9,12-14     |
| Other analyses           | 17 Report other analyses done—eg analyses of subgroups and interactions, and sensitivity analyses                                                                                                                                                                                                                                                                                                                | 13          |
| <b>Discussion</b>        |                                                                                                                                                                                                                                                                                                                                                                                                                  |             |
| Key results              | 18 Summarise key results with reference to study objectives                                                                                                                                                                                                                                                                                                                                                      | 15          |
| Limitations              | 19 Discuss limitations of the study, taking into account sources of potential bias or imprecision. Discuss both direction and magnitude of any potential bias                                                                                                                                                                                                                                                    | 15          |
| Interpretation           | 20 Give a cautious overall interpretation of results considering objectives, limitations, multiplicity of analyses, results from similar studies, and other relevant evidence                                                                                                                                                                                                                                    | 17-19       |
| Generalisability         | 21 Discuss the generalisability (external validity) of the study results                                                                                                                                                                                                                                                                                                                                         | 17          |
| <b>Other information</b> |                                                                                                                                                                                                                                                                                                                                                                                                                  |             |
| Funding                  | 22 Give the source of funding and the role of the funders for the present study and, if applicable, for the original study on which the present article is based                                                                                                                                                                                                                                                 | 19          |

\*Give information separately for cases and controls in case-control studies and, if applicable, for exposed and unexposed groups in cohort and cross-sectional studies.

**Note:** An Explanation and Elaboration article discusses each checklist item and gives methodological background and published examples of transparent reporting. The STROBE checklist is best used in conjunction with this article (freely available on the Web sites of PLoS Medicine at <http://www.plosmedicine.org/>, Annals of Internal Medicine at <http://www.annals.org/>, and Epidemiology at <http://www.epidem.com/>). Information on the STROBE Initiative is available at [www.strobe-statement.org](http://www.strobe-statement.org).

# BMJ Open

**Do changing levels of maternal exercise during pregnancy affect neonatal adiposity? Secondary analysis of the Babies After SCOPE: Evaluating the Longitudinal Impact Using Neurological and Nutritional Endpoints (BASELINE) birth cohort (Cork, Ireland)**

|                                 |                                                                                                                                                                                                                                                                                                                                                                                                                                                                                                                                                                                                                                                                                                                            |
|---------------------------------|----------------------------------------------------------------------------------------------------------------------------------------------------------------------------------------------------------------------------------------------------------------------------------------------------------------------------------------------------------------------------------------------------------------------------------------------------------------------------------------------------------------------------------------------------------------------------------------------------------------------------------------------------------------------------------------------------------------------------|
| Journal:                        | <i>BMJ Open</i>                                                                                                                                                                                                                                                                                                                                                                                                                                                                                                                                                                                                                                                                                                            |
| Manuscript ID                   | bmjopen-2017-017987.R1                                                                                                                                                                                                                                                                                                                                                                                                                                                                                                                                                                                                                                                                                                     |
| Article Type:                   | Research                                                                                                                                                                                                                                                                                                                                                                                                                                                                                                                                                                                                                                                                                                                   |
| Date Submitted by the Author:   | 27-Jul-2017                                                                                                                                                                                                                                                                                                                                                                                                                                                                                                                                                                                                                                                                                                                |
| Complete List of Authors:       | Norris, Tom; University of Leicester College of Medicine Biological Sciences and Psychology, Health Sciences<br>McCarthy, Fergus; The Irish Centre for Fetal and Neonatal Translational Research (INFANT), Department of Obstetrics and Gynecology<br>Khashan, Ali; University College Cork, Department of Epidemiology and Public Health<br>Murray, Deidre; University College Cork, Paediatrics and Child Health<br>Kiely, Mairead; University College Cork, Food and Nutritional Sciences<br>Hourihane, Jonathan; University College, Cork, Ireland, Paediatrics and Child Health<br>Baker, Philip ; University of Leicester, College of Medicine<br>Kenny, Louise; University College Cork, Obstetrics and Gynaecology |
| <b>Primary Subject Heading</b>: | Epidemiology                                                                                                                                                                                                                                                                                                                                                                                                                                                                                                                                                                                                                                                                                                               |
| Secondary Subject Heading:      | Obstetrics and gynaecology                                                                                                                                                                                                                                                                                                                                                                                                                                                                                                                                                                                                                                                                                                 |
| Keywords:                       | adiposity, exercise, pregnancy, PEAPOD                                                                                                                                                                                                                                                                                                                                                                                                                                                                                                                                                                                                                                                                                     |
|                                 |                                                                                                                                                                                                                                                                                                                                                                                                                                                                                                                                                                                                                                                                                                                            |

SCHOLARONE™  
Manuscripts

1  
2  
3 Do changing levels of maternal exercise during pregnancy affect neonatal adiposity? Secondary  
4 analysis of the Babies After SCOPE: Evaluating the Longitudinal Impact Using Neurological and  
5 Nutritional Endpoints (BASELINE) birth cohort (Cork, Ireland).  
6  
7

8  
9 **Norris, T.,<sup>1</sup> McCarthy, F.P.,<sup>2,3</sup> Khashan, A.S.,<sup>2,4</sup> Murray, D.M.,<sup>2,5</sup> Kiely, M.,<sup>2,6</sup> Hourihane, J. O'B.,<sup>2,5</sup>**  
10 **Baker, P.N.,<sup>7\*</sup> & Kenny, L.C.<sup>2\*</sup>**  
11  
12

13  
14  
15 <sup>1</sup>Department of Health Sciences, College of Medicine, Biological Sciences and Psychology, University  
16 of Leicester, Leicester, LE1 7RH. [Tel: 0116 252 5439](tel:01162525439) email: [tom.norris@le.ac.uk](mailto:tom.norris@le.ac.uk)  
17  
18

19 <sup>2</sup>The Irish Centre for Fetal and Neonatal Translational Research (INFANT), University College Cork,  
20 Cork University Maternity Hospital, Wilton, Cork, Ireland and  
21

22 <sup>3</sup>Division of Women's Health KCL, Women's Health Academic Centre KHP, St Thomas's Hospital,  
23 London.  
24  
25

26  
27 <sup>4</sup>Department of Epidemiology and Public Health, University College Cork, Ireland  
28

29 <sup>5</sup>Department of Paediatrics and Child Health, University College Cork  
30  
31

32 <sup>6</sup>Cork Centre for Vitamin D and Nutrition Research, School of Food and Nutritional Sciences,  
33 University College Cork  
34  
35

36  
37 <sup>7</sup>College of Medicine, Biological Sciences and Psychology, University of Leicester, Leicester  
38

39 (\*Joint senior authors)  
40

41 *on behalf of the SCOPE Ireland Cohort study and the Cork BASELINE Birth Cohort*  
42 *Study*  
43  
44

45  
46  
47  
48 Address for correspondence: Department of Health Sciences, College of Medicine, Biological  
49 Sciences and Psychology, University of Leicester, Leicester, LE1 7RH. [Tel: 0116 252 5439](tel:01162525439) email:  
50 [tom.norris@le.ac.uk](mailto:tom.norris@le.ac.uk)  
51  
52  
53  
54  
55  
56  
57  
58  
59  
60



**Abstract:**

**Objective:** To investigate whether changing levels of exercise during pregnancy are related to altered neonatal adiposity. **Design:** Secondary analysis of data from a prospective cohort study.

**Setting:** Cork, Ireland. **Participants:** 1200 mother-infant pairs recruited as part of a prospective birth cohort, Babies After SCOPE: Evaluating the Longitudinal Impact Using Neurological and Nutritional Endpoints (BASELINE). **Main outcome measures:** Neonatal adiposity was assessed within several days of birth using air displacement plethysmography (PEAPOD). Percent body fat (BF%) as a continuous outcome and a pair of dichotomous variables; high or low adiposity, representing BF% >90<sup>th</sup> or <10<sup>th</sup> centile, respectively. Multivariable linear and logistic regression models were used to investigate the relationship between exercise and the respective outcomes. **Results:** Crude analysis revealed no association between a changing level of exercise (since becoming pregnant) at 15 weeks' gestation and any of the outcomes (%BF, low adiposity, high adiposity). At 20 weeks' gestation, analyses revealed that relative to women who do not change their exercise level up to 20 weeks, those women who decreased their exercise level were more likely to give birth to a neonate with adiposity above the 90<sup>th</sup> centile (OR: 1.62; 95% CI: 1.07; 2.46). This association was maintained after adjustment for putative confounders (OR: 1.62; 95% CI: 1.06; 2.47). **Conclusions:** We observed a possible critical period for the association between changing exercise levels and neonatal adiposity, with no association observed with exercise recall for the first 15 weeks of gestation, but an association with a decreasing level of exercise between 15 and 20 weeks. These results should be interpreted in line with the limitations of the study and further studies utilising objectively measured estimates of exercise are required in order to replicate these findings.

**Article Summary:***Strength and limitations of this study*

- Air displacement plethysmography (PEAPOD) was used to measure neonatal body composition
- Directed acyclic graphs (DAGs), based on an understanding of the causal network linking the variables in the analysis, were used to identify putative confounding variables
- Exercise variables were based on maternal self-report and therefore subject to error
- Pre-pregnancy exercise data were not available, meaning we were unable to ascertain what pre-pregnancy exercise level women had changed from

## Introduction:

In their 2006 guideline, the Royal College of Obstetricians and Gynaecologists (RCOG) concluded that pregnant women should be 'encouraged to initiate or continue exercise to derive the health benefits associated with such activities'.<sup>1</sup>

The benefits of physical activity during pregnancy are likely to operate through an increased blood flow and oxygenation to the fetus.<sup>2,3</sup> It has also been proposed that the impact of exercise on fetal growth is mediated by its effect on maternal insulin sensitivity, glucose metabolism and gestational weight gain.<sup>4,5</sup> Another mechanism by which exercise could exert its effect is via the functioning of the uteroplacental unit, for example by affecting placental function, volume and growth rates.<sup>6-8</sup> However, the apparent beneficial effects of exercise appear to be dependent upon the timing of when exercise is undertaken. For example, Clapp et al (2002) demonstrated that women who performed a high quantity of moderate exercise in early pregnancy and then cut back in late pregnancy (hi-lo) delivered offspring who were heavier and longer at birth, compared to offspring of women who either did moderate volumes in both early and late pregnancy or a low volume followed by a high volume (lo-hi). The hi-lo exercise regimen was also associated with a greater placental volume at delivery, relative to the other two groups,<sup>7</sup> presumably as a result of faster placental growth in early gestation. Those who either maintained moderate exercise or increased to a high volume of exercise in late gestation (relative to the hi-lo group) did not exhibit this increased placental volume at birth, suggesting that early gestation is a critical period for any exercise effects on placental development to be enacted, with a potentially suppressive effect in late gestation.<sup>2</sup> Furthermore, it has been reported that the transient changes in glucose regulation observed after bouts of exercise differ depending on when in pregnancy the exercise load is occurring, with increases in blood glucose observed after exercise early in pregnancy, but decreases in later pregnancy.<sup>9</sup> These fluctuations in nutrient supply, depending on the timing of exercise, could also contribute to differential effects on fetal growth.

1  
2  
3 The data surrounding the effects of physical activity on neonatal body composition (as opposed to  
4 size) from large scale observational studies is limited. Data from a limited number of relatively small  
5 randomised controlled trials report either a null or reducing effect of physical activity on neonatal  
6 adiposity,<sup>7 8 10</sup> with potentially greater effects if the exercise intervention is administered at later  
7 gestations. Findings from a recent observational study, the Healthy Start cohort (n=826), also  
8 suggested that increasing physical activity levels in later pregnancy could result in a reduction in  
9 neonatal adiposity, even after adjusting for putative confounders (e.g. maternal age, race or  
10 ethnicity, educational status, household income, pre-pregnancy body mass index (BMI), and prenatal  
11 smoking status).<sup>11</sup>

12  
13 It is now well established that the *in utero* milieu experienced by the developing fetus could  
14 influence long-term risk for the development of obesity and obesity-related non-communicable  
15 diseases (OR-NCDs).<sup>12-14</sup> Maternal behaviour during this critical period of developmental plasticity  
16 has the potential to permanently alter susceptibility to later chronic disease via alterations in the  
17 offspring's metabolic and endocrinological phenotype.<sup>15-17</sup> Consequently, we hypothesise that  
18 maternal exercise in pregnancy will be associated with altered neonatal adiposity, such that an  
19 increasing/decreasing exercise level in pregnancy will be associated with a reduction/increase in  
20 adiposity, respectively. Any changes in neonatal adiposity could be indicative of an altered  
21 phenotypic profile in the offspring, which may increase susceptibility to later chronic disease.

22  
23 The objective of the current study was to investigate whether changes in maternal exercise during  
24 pregnancy were associated with offspring adiposity in the neonatal period, measured using air  
25 displacement plethysmography in a large homogeneous population.  
26  
27  
28  
29  
30  
31  
32  
33  
34  
35  
36  
37  
38  
39  
40  
41  
42  
43  
44  
45  
46  
47  
48  
49  
50  
51  
52  
53  
54  
55  
56  
57  
58  
59  
60

**Methods:**

Neonatal participants were recruited as part of the Cork BASELINE birth cohort study (ClinicalTrials.gov NCT: 01498965 [www.birthcohorts.net](http://www.birthcohorts.net))<sup>18</sup> between August 2008 and August 2011 from women who had participated in SCOPE (Screening for Pregnancy Endpoints) Ireland. SCOPE was a multicentre prospective cohort study with the aim of developing screening tests to predict various complications of pregnancy (e.g. pre-eclampsia, small-for-gestational-age (SGA) infants, and spontaneous preterm birth) (ACTRN12607000551493).<sup>19</sup> Methods are described in detail elsewhere.<sup>19 20</sup> In brief, participants were healthy nulliparous women with singleton pregnancies recruited antenatally between February 2007 and February 2011 in Cork, Ireland. Women were recruited, interviewed and all measurements obtained at 15±1 and 20±1 weeks' gestation.<sup>19 21</sup> Exclusion criteria included: a high risk for pre-eclampsia/delivery of a SGA neonate/spontaneous preterm birth because of underlying medical conditions; three or more previous miscarriages; three or more terminations of pregnancy; or having received interventions such as aspirin that might modify pregnancy outcome. At the time of interview, data were entered onto an internet-accessed central database with a complete audit trail designed and hosted by MedSciNet, Sweden. Participants were followed up prospectively, with pregnancy outcome data collected by trained research midwives.

Neonatal adiposity was assessed in the majority of neonates within 72 hours of birth by calculating neonatal body fat percentage (BF%) using the PEAPOD air displacement plethysmography. The mean time of measuring BF% in those infants born over 37 weeks' gestation was 1.8 days (standard deviation 0.97 days). Of those infants born <37 weeks' gestation, the mean time of testing was 2.4 days (standard deviation 1.2 days). Measurement of neonatal BF% involves direct measurement of body mass using precise scale and body volume in an airtight, enclosed chamber. Body composition assessment by densitometry involves the measurement of the density of the whole body. Body density is then used in a two-compartment model to calculate the percentage of fat, fat mass, and

1  
2  
3 fat-free mass.<sup>22</sup> The PEAPOD has excellent test-to-test reproducibility and is safe, non-invasive and  
4  
5 fast.<sup>23 24</sup>  
6  
7

8 Exercise data were collected at both the 15 and 20 week visits in a standardised manner. At both  
9  
10 time points, women were asked how many times per week they engaged in vigorous activity (which  
11  
12 made the woman breathe harder or puff or pant),<sup>25</sup> moderate activity (did not breathe harder or  
13  
14 puff or pant) or walking for recreation or exercise. At 15 weeks, women were asked: *'Has your level*  
15  
16 *of exercise (physical activity) changed since you've been pregnant?'*, to which they could respond  
17  
18 *'decreased', 'unchanged' or 'increased'*. At 20 weeks, women were then asked: *'Has your level of*  
19  
20 *exercise changed since last SCOPE visit?'*, with the same possible response options.  
21  
22

#### 23 *Statistical analysis:*

24  
25  
26 Differences in maternal characteristics and birth outcomes, stratified by change in exercise level,  
27  
28 were explored using one way analysis of variance for continuous variables (with scheffe test for  
29  
30 post-hoc pairwise comparisons) and  $\chi^2$  test for categorical variables (table 1). Descriptive statistics  
31  
32 (frequencies and percentages) of the different levels of exercise were summarised and are shown in  
33  
34 table 2. We generated a 'no exercise' binary variable with a value of 1 indicating women who  
35  
36 reported doing no vigorous nor moderate nor recreational walking activity per week.  
37  
38

39  
40 We used linear regression models to investigate the effect of changing levels of self-reported  
41  
42 maternal exercise during pregnancy on birthweight (g) and %BF measured as continuous variables.  
43  
44 Change in exercise levels was coded as a categorical variable: no change (reference group) versus  
45  
46 decreased versus increased. Regression diagnostics did not reveal any violations to linear regression  
47  
48 assumptions (i.e. normally distributed residuals and homogeneity of variance). We subsequently  
49  
50 generated separate binary variables (0=no; 1=yes) indicating the presence of either low or high  
51  
52 adiposity. Low and high adiposity was defined as below/above the gestational age- and sex-specific  
53  
54 10<sup>th</sup>/90<sup>th</sup> adiposity centiles respectively, according to the centiles produced by Hawkes et al (2011).<sup>26</sup>  
55  
56  
57  
58  
59  
60

1  
2  
3 The effect of changes in physical activity on these dichotomous variables was investigated using  
4  
5 logistic regression models.  
6

7  
8 We performed sensitivity analyses limiting the sample to only those born at term (n=1180) and  
9  
10 separately, to those born non-low birthweight (>2500g) (n=1180) but effect estimates did not  
11  
12 markedly change and thus these infants were retained in the analysis. Furthermore, as the analysis  
13  
14 sample was based on those that had complete data for the exposure, outcome and covariates, we  
15  
16 also investigated whether we had introduced a selection bias by only including those with complete  
17  
18 data (supplementary tables 1 and 2).  
19

20  
21 In order to identify less biased associations between our exposures and outcome, we produced a  
22  
23 directed acyclic graph (DAG) using Daggity.<sup>27</sup> DAGs provide a method for formalising and clarifying  
24  
25 the causal hypothesised assumptions a researcher may make regarding the variables they wish to  
26  
27 analyse<sup>28</sup> and thus justify modelling choices.<sup>29 30</sup> These graphs are especially useful for identifying  
28  
29 variables which potentially confound the relationship between two variables, thus providing  
30  
31 researchers with sets of variables for which adjustment (and importantly non-adjustment) is  
32  
33 necessary, in order to obtain unbiased estimates of the relationship between a set of variables. For a  
34  
35 more detailed discussion on the use of these graphs in epidemiology, see Greenland, Pearl and  
36  
37 Robins.<sup>31</sup> Daggity is a web-based interface which allows researchers to construct and edit a directed  
38  
39 acyclic graph, with the ultimate aim of identifying sufficient sets of variables for adjustment which  
40  
41 will minimise bias when estimating the effect of an exposure on the outcome. The set of variables  
42  
43 identified by Daggity as necessary for adjustment were socioeconomic status, maternal  
44  
45 employment, smoking status, alcohol intake, BMI, level of education, maternal age and whether the  
46  
47 mother's job was physically active (see supplementary figure 1 for analysis DAG). These variables  
48  
49 were then incorporated into multivariable regression models. All analyses were conducted in  
50  
51 Stata/IC v14.1.  
52  
53  
54  
55  
56  
57  
58  
59  
60

**Results:***Descriptive statistics of the sample (and those omitted)*

Compared to all of those enrolled without a PEADOD measurement (n=513) cohort, those enrolled in Cork with a PEAPOD measurement taken (n=1258) were approximately 130g (95% CI: 80-190) heavier and born approximately 2 days later (95% CI: 1.05-3.01), but with no differences in any maternal biological or demographic data (Supplementary table 1). Although 1258 had PEAPOD measurements taken, 58 infants were not included in the final analysis due to: all PEAPOD data being lost/mis-entered (n=16), being born too early or late for adiposity centiles to be generated (n=23) and having incomplete exposure and covariate data (n=19), leaving a final analysis sample of 1200. Compared to those with PEAPOD measurements but not in the final analysis sample, those who were in the final analysis had higher birthweight (187.81; 95% CI: 64.45-311.17), but with no differences in gestational age or any maternal biological or demographic data (Supplementary table 2).

Of the 1200 neonates with complete exposure, outcome and covariate data, 612 (51.00%) were male and 98.25% (n=1 179) were of White European ethnic origin. The mean birthweight was 3510g (95% CI: 3484 - 3537) and the median gestational age was 40 weeks (interquartile range: 39 - 41).

*Change in exercise level reported in the first 15 weeks of pregnancy*

Table 1 provides descriptive statistics for various maternal characteristics and neonatal outcomes, stratified by type of change of exercise in pregnancy. Compared to women who reported no change in exercise level, those who decreased their level of exercise were older (30.51 years (4.17) vs. 28.89 years (4.74)), with a higher level socioeconomic status (44.33 (16.15) vs. 39.10 (15.40)), less likely to have a household income below €21 000 (5.80% vs. 13.16%) and less likely to have smoked during the first trimester (6.03% vs. 15.90%). The small proportion of women who reported increasing their



1  
2  
3 exercise levels from the time they became pregnant to 15 weeks gestation (<4%) did not differ  
4  
5 substantially from the cohort, with the exception of having a higher likelihood of a lower household  
6  
7 income (Table 1).  
8  
9

10 It is shown in Table 2 that at 15 weeks' gestation, more than a quarter (n=327, 27.25%) of women  
11  
12 reported engaging in vigorous exercise at least once per week, with approximately three quarters  
13  
14 reporting doing some form of moderate exercise per week (n=892, 74.33%). 104 (8.67%) women  
15  
16 reported not engaging in any form of exercise per week.  
17  
18

19 The effect of changing exercise levels on birthweight and neonatal adiposity is shown in Table 3.  
20  
21 Relative to women who did not change their exercise level in pregnancy up to 15 weeks, there was  
22  
23 no difference in any of the outcomes in those women who either increased or decreased their level  
24  
25 of exercise, in both crude and adjusted analyses. Changing the reference group in order to compare  
26  
27 those who decreased relative to those who increased also revealed no differences in neonatal  
28  
29 outcomes.  
30  
31  
32  
33  
34  
35  
36  
37  
38  
39  
40  
41  
42  
43  
44  
45  
46  
47  
48  
49  
50  
51  
52  
53  
54  
55  
56  
57  
58  
59  
60

Table 1: Descriptive statistics in those with changing levels of physical activity during pregnancy

|                                                                   | Change in exercise level in pregnancy to 15 weeks (n=1200)     |                            |                           |
|-------------------------------------------------------------------|----------------------------------------------------------------|----------------------------|---------------------------|
|                                                                   | Decreased (n=813 (67.8%))                                      | Unchanged (n=346(28.8%))   | Increased (n=41 (3.4%))   |
| <b>Maternal characteristics:</b>                                  |                                                                |                            |                           |
| Maternal age (mean;SD)                                            | 30.51 (4.17) <sup>†</sup>                                      | 28.89 (4.74)               | 28.88 (5.19)              |
| Maternal BMI at 15 weeks (mean;SD)                                | 25.02 (4.12)                                                   | 24.49 (4.21)               | 24.18 (3.85)              |
| Maternal years schooling (mean;SD)                                | 13.27 (0.83)                                                   | 13.18 (0.81)               | 13.15 (0.73)              |
| Maternal socioeconomic status (mean;SD)                           | 44.33 (16.15) <sup>†</sup>                                     | 39.10 (15.40)              | 43.51 (16.35)             |
| Maternal household income <€21 000 (n:%)                          | 47 (5.80) <sup>†‡</sup>                                        | 45 (13.16)                 | 7 (17.07)                 |
| Maternal smoking in 1 <sup>st</sup> trimester (n:%)               | 49 (6.03) <sup>†</sup>                                         | 55 (15.90)                 | 5 (12.20)                 |
| Maternal alcohol intake in 1 <sup>st</sup> trimester (units/week) | 4.61 (5.76)                                                    | 5.39 (6.97)                | 5.99 (8.10)               |
| <b>Birth outcomes:</b>                                            |                                                                |                            |                           |
| Gestational age (weeks) (mean;SD)                                 | 40 (1.16)                                                      | 40 (1.24)                  | 40 (1.00)                 |
| Birth weight (g) (mean;SD)                                        | 3525 (460)                                                     | 3471 (478)                 | 3541 (449)                |
| Neonatal adiposity (%) (mean;SD)                                  | 11.06 (4.15)                                                   | 11.03 (4.06)               | 11.22 (4.13)              |
| Adiposity<10 <sup>th</sup> centile (yes) (n:%)                    | 68 (8.36)                                                      | 26 (7.51)                  | 3 (7.32)                  |
| Adiposity>90 <sup>th</sup> centile (yes) (n:%)                    | 86 (10.58)                                                     | 39 (11.27)                 | 7 (17.07)                 |
|                                                                   | Change in exercise level in pregnancy: 15 to 20 weeks (n=1200) |                            |                           |
|                                                                   | Decreased (n=263 (21.9%))                                      | Unchanged (n=665 (55.4%))  | Increased (n=272 (22.7%)) |
| <b>Maternal characteristics:</b>                                  |                                                                |                            |                           |
| Maternal age (mean;SD)                                            | 30.74 (4.13) <sup>†</sup>                                      | 29.52 (4.58) <sup>‡</sup>  | 30.39 (4.25)              |
| Maternal BMI at 15 weeks (mean;SD)                                | 25.07 (4.06)                                                   | 24.60 (4.01)               | 25.20 (4.52)              |
| Maternal years schooling                                          | 13.28 (0.72)                                                   | 13.23 (0.86)               | 13.22 (0.82)              |
| Maternal socioeconomic status                                     | 44.33 (15.49) <sup>†</sup>                                     | 40.96 (16.08) <sup>‡</sup> | 45.79 (16.21)             |
| Maternal household income <€21 000 (n:%)                          | 15 (5.70) <sup>†</sup>                                         | 66 (10.03)                 | 18 (6.62)                 |
| Maternal smoking in 1 <sup>st</sup> trimester (n:%)               | 23 (8.75)                                                      | 73 (10.98) <sup>‡</sup>    | 13 (4.78)                 |
| Maternal alcohol intake in 1 <sup>st</sup> trimester (units/week) | 4.91 (5.79)                                                    | 5.24 (6.82) <sup>‡</sup>   | 3.98 (5.01)               |
| <b>Birth outcomes:</b>                                            |                                                                |                            |                           |
| Gestational age (weeks) (mean;SD)                                 | 40 (1.20)                                                      | 40 (1.19)                  | 40 (1.14)                 |
| Birth weight (g) (mean;SD)                                        | 3541 (498)                                                     | 3487 (458)                 | 3537 (448)                |
| Neonatal adiposity (%) (mean;SD)                                  | 11.44 (4.66)                                                   | 10.90 (4.02)               | 11.08 (3.79)              |
| Adiposity<10 <sup>th</sup> centile (yes) (n:%)                    | 22 (8.37)                                                      | 58 (8.87)                  | 16 (5.88)                 |
| Adiposity>90 <sup>th</sup> centile (yes) (n:%)                    | 41 (15.59)                                                     | 68 (10.23)                 | 23 (8.46)                 |

<sup>†</sup>different to 'unchanged' <sup>‡</sup>different to 'increased'

Table 2: Descriptive statistics of self-reported activity levels at 15 and 20 weeks

|                                                          | Exercise level at 15 weeks (n=1200)                 | Exercise level at 20 weeks (n=1200) |                   |
|----------------------------------------------------------|-----------------------------------------------------|-------------------------------------|-------------------|
| Vigorous at least once per week (yes) (n; % of 1200)     | 327 (27.25)                                         | 377 (31.42)                         |                   |
| Moderate at least once per week (yes) (n; % of 1200)     | 892 (74.33)                                         | 908 (75.67)                         |                   |
| Recreational at least once per week (yes) (n; % of 1200) | 1040 (86.67)                                        | 1057 (88.08)                        |                   |
| No exercise per week (n; % of 1200)                      | 104 (8.67)                                          | 100 (8.33)                          |                   |
|                                                          | <i>Change in exercise level between 15-20 weeks</i> |                                     |                   |
|                                                          | Decreased (n=263)                                   | Unchanged (n=665)                   | Increased (n=272) |
| Any exercise per week at 15 weeks                        |                                                     |                                     |                   |
| No (n; % of column total)                                | 7 (2.66)                                            | 72 (10.83)                          | 25 (9.19)         |
| Yes (n; % of column total)                               | 256 (97.34)                                         | 593 (89.17)                         | 247 (90.81)       |

1  
2  
3 *Change in exercise level between 15 and 20 weeks*  
4

5  
6 Compared to women who reported no change in exercise level between 15 and 20 weeks, those  
7  
8 who decreased their level of exercise were older (30.74 years (4.13) vs. 29.52 years (4.58)), with a  
9  
10 higher level socioeconomic status (44.33 (15.49) vs. 40.96 (16.08)) and less likely to have a  
11  
12 household income below €21 000 (n=15 (5.70%) vs. n=66 (10.03%)). Women who increased their  
13  
14 exercise levels between 15 and 20 weeks, relative to those who reported no change, were also older  
15  
16 and with a higher SES, with a reduced alcohol intake (3.98 (5.01) units/week vs. 5.24 (6.82)  
17  
18 units/week) and lower likelihood of smoking during the 1<sup>st</sup> trimester (n=13 (4.78%) vs. n=73 (10.98%)  
19  
20 (Table 1).  
21

22  
23 At 20 weeks, similar levels of exercise were reported, with approximately 30% of women reporting  
24  
25 doing vigorous exercise at least once per week, and three quarters of the sample engaging in some  
26  
27 form of moderate exercise. Just over 8% of women reported taking part in no form of exercise at 20  
28  
29 weeks (Table 2). Table 2 also reveals that of the 665 women who reported no change in their  
30  
31 exercise levels between 15-20 weeks, approximately 10% of these (n=72) had engaged in no exercise  
32  
33 at 15 weeks. Similarly, of those who increased their exercise levels between 15-20 weeks, just under  
34  
35 10% (n=25) had reported no exercise at 15 weeks (Table 2).  
36  
37

38  
39 Crude analysis shows that relative to women who do not change their exercise level between 15 and  
40  
41 20 weeks, those women who decreased their exercise level were more likely to give birth to a  
42  
43 neonate with adiposity above the 90<sup>th</sup> centile (OR: 1.62; 95% CI:1.07; 2.46) (Table 3). This association  
44  
45 was maintained after adjustment for the putative confounders (OR: 1.66; 95% CI: 1.09; 2.54). When  
46  
47 changing the reference group in order to compare women who decreased exercise levels relative to  
48  
49 those who increased exercise, it was observed that those who decreased were twice as likely to give  
50  
51 birth to a neonate with an adiposity above the 90<sup>th</sup> centile (OR: 2.00; 95% CI: 1.16 - 3.44), which  
52  
53 again was also maintained on adjustment (OR: 2.09; 95% CI: 1.20 - 3.61). Birthweight was not  
54  
55 associated with differences in exercise (Table 3).  
56  
57  
58  
59  
60

Table 3: Effect of changing exercise levels during pregnancy on neonatal adiposity

|                                       | Change in exercise level in pregnancy to 15 weeks (coefficient; 95%CI)     |             |                        |                        |             |                        |
|---------------------------------------|----------------------------------------------------------------------------|-------------|------------------------|------------------------|-------------|------------------------|
|                                       | Crude                                                                      |             |                        | Multivariable***       |             |                        |
|                                       | Decreased                                                                  | Unchanged   | Increased              | Decreased              | Unchanged   | Increased              |
| Birthweight (g)*                      | 54.39 (-4.16; 112.93)                                                      | (reference) | 70.24 (-80.40; 220.89) | 22.03 (-37.61; 81.67)  | (reference) | 74.40 (-75.84; 224.64) |
| Neonatal adiposity (%)*               | 0.03 (-0.49; 0.55)                                                         | (reference) | 0.19 (-1.15; 1.53)     | 0.01 (-0.52; 0.55)     | (reference) | 0.33 (-1.01; 1.67)     |
| Adiposity <10 <sup>th</sup> centile** | 1.12 (0.70; 1.80)                                                          | (reference) | 0.97 (0.28; 3.36)      | 1.20 (0.73; 1.95)      | (reference) | 0.82 (0.23; 2.94)      |
| Adiposity >90 <sup>th</sup> centile** | 0.93 (0.62; 1.39)                                                          | (reference) | 1.62 (0.67; 3.90)      | 0.96 (0.62; 1.41)      | (reference) | 1.75 (0.71; 4.31)      |
|                                       | Change in exercise level in pregnancy: 15 to 20 weeks (coefficient; 95%CI) |             |                        |                        |             |                        |
|                                       | Crude                                                                      |             |                        | Multivariable***       |             |                        |
|                                       | Decreased                                                                  | Unchanged   | Increased              | Decreased              | Unchanged   | Increased              |
| Birthweight (g)*                      | 54.47 (-11.96; 120.90)                                                     | (reference) | 50.11 (-15.53; 115.75) | 42.68 (-23.62; 108.98) | (reference) | 22.30 (-43.49; 88.09)  |
| Neonatal adiposity (%)*               | 0.54 (-0.05; 1.13)                                                         | (reference) | 0.18 (-0.40; 0.76)     | 0.56 (-0.03; 1.15)     | (reference) | 0.13 (-0.46; 0.72)     |
| Adiposity <10 <sup>th</sup> centile** | 0.94 (0.56; 1.56)                                                          | (reference) | 0.64 (0.36; 1.14)      | 0.94 (0.56; 1.59)      | (reference) | 0.69 (0.39; 1.24)      |
| Adiposity >90 <sup>th</sup> centile** | 1.62 (1.07; 2.46)                                                          | (reference) | 0.81 (0.49; 1.33)      | 1.66 (1.09; 2.54)      | (reference) | 0.80 (0.48; 1.32)      |

\*Linear regression for continuous outcomes (β); \*\*logistic regression for dichotomous outcomes (OR) \*\*\*adjusted for: socioeconomic status, years of schooling, employment status, maternal BMI, smoking in 1st trimester, alcohol intake in 1st trimester, maternal age, exercise as part of job

## Discussion

In this cohort of white European mother-offspring pairs, we report the effect of changing levels of exercise during pregnancy and neonatal adiposity measured using air displacement plethysmography (PEAPOD). We observed that pregnant women who reported a decrease in exercise levels between 15 and 20 weeks, had a 60% higher risk of having a baby with adiposity above the 90<sup>th</sup> centile when compared with women who reported no change. This risk was approximately double when women who reported a decrease in exercise levels between 15 and 20 weeks were compared to women who reported an increase in exercise levels. This association was maintained after adjustment for a set of putative confounders including maternal education, employment status, smoking, alcohol intake, BMI socioeconomic status, maternal age and whether her occupation was physically active. The exercise effect was only apparent between 15 and 20 weeks and not for changing exercise levels prior to 15 weeks, raising the possibility that there is a potential critical period with regard to the effect of a change on exercise level on the development of offspring adiposity.

A major strength of the study is the use of air-displacement plethysmography for the estimates of body composition. This method is a quick, safe and non-invasive technique, which has shown to be a reliable and accurate instrument for determining body fat percentage in infants.<sup>23 32 33</sup> As such, it has been deemed the primary method for measuring body density in paediatric populations.<sup>34</sup> Inter-observer variability was reduced by having a small, highly trained team of midwives and researchers who conducted all of the assessments to strict protocols. However, repeated measurements were not performed and thus we were unable to assess intra-observer variability. The prospective design of the cohort, allowing us to comprehend the temporal relationship between variables and the rich collection of covariates available for adjustment further strengthens the study. Another strength of this study is the use of a directed acyclic graph (DAG) which is based on an understanding of the causal network linking the variables in the analysis. As such, the DAG allows for the appropriate adjustment for a set of putative confounders in order to obtain a less biased estimate of the effect of

1  
2  
3 changing levels of exercise on neonatal adiposity. We are, however, cautious not to refer to any  
4  
5 effect as 'causal' as we cannot exclude the possibility of the presence of both residual confounding  
6  
7 and, in particular with this subjective measurement of exercise, measurement error.  
8

9  
10 Arguably the greatest limitation is the subjective nature of the exercise data. Whilst the  
11  
12 questionnaire regarding physical exercise was not validated for any population, the definition of  
13  
14 vigorous exercise (daily exercise leading to heavy breathing or being out of breath) has previously  
15  
16 been used in other studies.<sup>25</sup> As the exercise variables were based on maternal report, this  
17  
18 introduced a potential error due to women not accurately remembering their exercise levels (e.g.  
19  
20 due to social desirability of reporting higher levels or age). The recall period was relatively short,  
21  
22 considering only the very recent past, and focussed on habitual activity, thus reducing the extent of  
23  
24 the error introduced. An objectively measured assessment of physical activity (e.g. an  
25  
26 accelerometer), would have been of benefit to estimate actual activity. Nonetheless, in large-scale  
27  
28 cohort studies a compromise is often sought, with participant burden and cost-effectiveness on the  
29  
30 one side and a more precisely measured variable on the other. Furthermore, it has been reported  
31  
32 that pregnant women may wear monitors placed at the hip incorrectly due to changes in their girth.  
33  
34 <sup>35 36</sup> Accordingly, a recent systematic review found that in epidemiological studies amongst pregnant  
35  
36 women, self-reported physical activity measures were the most common assessment method.<sup>37</sup>  
37  
38 Research on agreement between subjective estimates of physical activity and objectives measures  
39  
40 has generated mixed results,<sup>38 39</sup> with the same systematic review concluding that the agreement  
41  
42 between questionnaires and objective measures of physical activity assessment, ranged from 'poor  
43  
44 to substantial'.<sup>37</sup>  
45  
46  
47  
48

49 A related limitation is that, as recruitment commenced during pregnancy, pre-pregnancy exercise  
50  
51 data was not available and as a result we were unable to determine what pre-pregnancy exercise  
52  
53 level women had changed from. It could be speculated that women who reported no change in  
54  
55 activity level at 15 weeks did not do any exercise to start with. We have shown that those women  
56  
57  
58  
59  
60

1  
2  
3 whose activity remained unchanged at 15 weeks (compared to those who decreased) were more  
4 likely to smoke during the first trimester, be of lower socioeconomic status and more likely to have a  
5 lower household income, all of which are associated with reduced levels of exercise and fetal  
6 growth. Whilst we adjusted for these confounding factors, the lack of baseline activity limits the  
7 interpretability of our findings. For example, it would have been interesting to determine whether  
8 the effect of a decreasing exercise level (vs. unchanged level) was the same across differing  
9 categories of baseline activity.  
10

11  
12 We were unable to adjust our estimates for the likely mediating role of gestational hyperglycaemia  
13 as these data were not available. Similarly, we did not adjust our estimates for the effect of  
14 gestational weight gain. In line with the published literature<sup>45 40 41</sup>, these variables are likely to  
15 operate along the causal pathway between maternal exercise and neonatal adiposity. While  
16 adjusting for them may mask part of the association between exercise and adiposity, it would have  
17 been of benefit to conduct *a priori* analysis to examine whether a change exercise was associated  
18 with neonatal adiposity independently of pre-pregnancy obesity, gestational weight gain or impaired  
19 glycaemic control. Acknowledging these data gaps, the current paper did not aim to elucidate  
20 possible mechanisms by which the association between exercise and adiposity is enacted, rather, we  
21 aimed to identify whether an association existed at all.  
22

23  
24 A final limitation is the potential lack of generalisability of our results to other groups. For example,  
25 study recruitment was limited to primiparous women with singleton pregnancies and notably, a  
26 majority of White European gravidas (approximately 98.25%) were recruited into the study. This  
27 predominance of White European gravidas does, however, reflect the demographic profile of  
28 females aged 15 to 44 in Ireland as a whole (95%).<sup>42</sup> Unfortunately, a number of infants (513/1771)  
29 were unable to have a body composition assessment. Possible reasons for this include a lag period  
30 between the start of the study and the arrival of the PEAPOD, and admittance of the infant to the  
31 neonatal intensive care unit (NICU). We have shown that although these infants differed slightly in  
32  
33  
34  
35  
36  
37  
38  
39  
40  
41  
42  
43  
44  
45  
46  
47  
48  
49  
50  
51  
52  
53  
54  
55  
56  
57  
58  
59  
60



1  
2  
3 terms of birthweight (median difference: 130g; 95% CI: 80-190g) and gestational age (median  
4  
5 difference: 0.29 weeks; 95% CI: 0.15 - 0.43 weeks), there were no differences in the maternal  
6  
7 characteristics of those with and without a PEAPOD measurement (supplementary table 1), and thus  
8  
9 we are confident we have not introduced a substantial selection bias into the analysis. The  
10  
11 employment of a complete-case analysis could also have introduced a degree of selection bias into  
12  
13 the analysis, however, supplementary table 2 shows that, apart from birthweight, there no  
14  
15 differences in the offspring or maternal characteristics of those with complete vs. incomplete data.  
16  
17  
18 To the authors' knowledge, this is the first study looking at the effect of changing exercise levels in  
19  
20 pregnancy on neonatal adiposity using air displacement plethysmography. Previous studies have  
21  
22 either used different measurement techniques (sum of skinfolds <sup>7 8</sup> or dual-energy x-ray  
23  
24 absorptiometry (DXA)<sup>10</sup>) or were not looking at changing levels of exercise. <sup>11</sup> A recent large  
25  
26 observational study observed that the lowest quartile of late-pregnancy energy expenditure was  
27  
28 associated with a substantially higher neonatal fat mass (290.5g vs 249.4g, p=0.03) within the first  
29  
30 72-hours, which was not mirrored in neonatal fat-free mass <sup>11</sup>. Unlike our study, however, no  
31  
32 differences were observed in either mid- or early pregnancy. However, the aforementioned study  
33  
34 was not investigating intra-pregnancy change and also relied on a statistically driven method to  
35  
36 identify potential confounders, ignoring the causal framework underpinning any possible  
37  
38 associations.  
39  
40  
41  
42

43 We observed a possible critical period for the effect of changing exercise levels, with no effect  
44  
45 observed with exercise recall for the first 15 weeks of gestation, but an effect of a decreasing level of  
46  
47 exercise between 15 and 20 weeks. This provides support for the findings of Clapp et al,<sup>7</sup> who found  
48  
49 that women who performed a high volume of moderate exercise in early pregnancy and then cut  
50  
51 back in late pregnancy delivered offspring who were heavier and longer at birth, compared to  
52  
53 offspring of women who either did moderate volumes in both early and late pregnancy or a low  
54  
55 volume followed by a high volume. <sup>7</sup> Indeed in our study we observed a markedly increased risk of  
56  
57  
58  
59  
60

1  
2  
3 delivering an infant with neonatal adiposity above the 90<sup>th</sup> centile in pregnant women who reported  
4  
5 having increased their exercise levels up to 15 weeks, but then reported a decrease between 15 and  
6  
7 20 weeks, relative to those who reported no change at both time points (OR: 5.87; 95% CI: 1.74-  
8  
9 19.80, data not shown), though the uncertainty of this estimate can be observed in the wide  
10  
11 confidence interval, reflecting the small number of women on which this finding was based.  
12

13  
14 The data presented here suggest that a reduction in exercise levels may lead to less favourable  
15  
16 outcomes in terms of neonatal adiposity. As such, and given the evidence of maintaining pre-  
17  
18 pregnancy exercise levels<sup>43 44</sup>, we advocate the continuation of pre- and early pregnancy exercise  
19  
20 levels into later pregnancy. Further studies utilising objectively measured estimates of physical  
21  
22 activity in a range of different population groups are required in order to replicate this finding. For  
23  
24 example, the cohort of women in this analysis exhibited relatively low levels of activity, with almost  
25  
26 75% of women never doing any vigorous activity at 15 weeks and only approximately 50% of the  
27  
28 women doing moderate activity more than once a week. If results appear consistent and robust to  
29  
30 these differences in methodology and population, then these findings have significant implications,  
31  
32 which extend beyond the short-term. For example, it has been shown that the associations between  
33  
34 maternal pregnancy exercise levels and offspring adiposity present at birth extend into childhood,  
35  
36 with children of women who exercised during pregnancy observed to have a reduced fat mass at age  
37  
38 5 years (37mm ± 1 vs. 44mm ± 4) compared children whose mothers were inactive<sup>45</sup>. However, the  
39  
40 overall lack of follow-up studies with body composition assessment at birth limits our ability to  
41  
42 explicitly link increased adiposity in early-life and later risk. Nonetheless, if the effects of a reduced  
43  
44 level of exercise are able to manifest in the offspring as an altered adiposity at birth, the wider  
45  
46 implication is that, during this critical period of developmental plasticity, some sort of programming  
47  
48 has occurred, potentially permanently altering the offspring's metabolic and endocrinological  
49  
50 phenotype (13-15),<sup>15-17</sup> and altering its long-term susceptibility to a variety of non-communicable  
51  
52 diseases (NCDs). It is hoped that with the increasing incorporation of body composition assessment  
53  
54  
55  
56  
57  
58  
59  
60

1  
2  
3 methods in infancy, particularly air-displacement plethysmography, these questions will be able to  
4  
5 be investigated.  
6  
7

8 **Conclusion:**  
9

10 A decreasing level of maternal reported exercise between 15 and 20 weeks' gestation was  
11 associated with an increased risk of delivering an infant with a high adiposity. This effect was  
12 maintained after appropriate adjustment for confounding variables as identified using knowledge of  
13 the causal network. However, these findings need interpreting in line with the limitations of the  
14 study. Accordingly, further research utilising objective measures of physical activity and in different  
15 populations needs to be conducted in order to validate results.  
16  
17  
18  
19  
20  
21  
22

23 **Acknowledgements:**  
24

25 We thank the pregnant women who participated in the SCOPE study and the mothers who allowed  
26 their newborn infants to participate in the BASELINE study.  
27  
28  
29

30 **Funding:**  
31

32 SCOPE Ireland was funded by the Health Research Board, Ireland (CSA 2007/2). The BASELINE cohort  
33 was supported by the National Children's Research Centre, Dublin, Ireland, and the Food Standards  
34 Agency of the United Kingdom (grant no. TO7060). SCOPE and BASELINE are supported by INFANT,  
35 an SFI funded Research Centre (grant no 12/RC/2272). The funders had no involvement in the study  
36 design, data collection, analysis and interpretation, as well as in the writing of the manuscript.  
37  
38  
39  
40  
41  
42  
43  
44

45 **Competing interests:**  
46

47 None declared.  
48  
49

50 **Contribution to authorship:**  
51  
52  
53  
54  
55  
56  
57  
58  
59  
60

1  
2  
3 LCK is guarantor. TN designed the study, analysed and interpreted the data, alongside LCK and PNB.  
4  
5 TN, AK, FMC, DMM, MK, J O'B H, LCK and PNB took part in drafting the article or revising it for  
6  
7 critically important intellectual content and all gave final approval of the version to be published.  
8  
9

10 **Ethics approval:**

11  
12 Ethical approval was obtained from the local ethics committees (Cork ECM5(10)05/02/08; approved  
13  
14 5 February 2008) and all women provided written informed consent.  
15  
16

17  
18 **Data sharing statement:** There are no additional data available.  
19  
20  
21  
22  
23  
24  
25  
26  
27  
28  
29  
30  
31  
32  
33  
34  
35  
36  
37  
38  
39  
40  
41  
42  
43  
44  
45  
46  
47  
48  
49  
50  
51  
52  
53  
54  
55  
56  
57  
58  
59  
60

## References

1. Royal College of Obstetricians and Gynaecologists. Exercise in Pregnancy. RCOG Statement No 4, 2006.
2. Hopkins SA, Cutfield WS. Exercise in pregnancy: weighing up the long-term impact on the next generation. *Exercise and sport sciences reviews* 2011;**39**(3):120-27.
3. Pivarnik JM, Mauer MB, Ayres NA, et al. Effects of chronic exercise on blood volume expansion and hematologic indices during pregnancy. *Obstetrics & Gynecology* 1994;**83**(2):265-69.
4. Russo LM, Nobles C, Ertel KA, et al. Physical activity interventions in pregnancy and risk of gestational diabetes mellitus: a systematic review and meta-analysis. *Obstetrics & Gynecology* 2015;**125**(3):576-82.
5. Sanabria-Martínez G, García-Hermoso A, Poyatos-León R, et al. Effectiveness of physical activity interventions on preventing gestational diabetes mellitus and excessive maternal weight gain: a meta-analysis. *BJOG: An International Journal of Obstetrics & Gynaecology* 2015;**122**(9):1167-74.
6. Jackson M, Gott P, Lye S, et al. The effects of maternal aerobic exercise on human placental development: placental volumetric composition and surface areas. *Placenta* 1995;**16**(2):179-91.
7. Clapp JF, Kim H, Burciu B, et al. Continuing regular exercise during pregnancy: effect of exercise volume on fetoplacental growth. *American journal of obstetrics and gynecology* 2002;**186**(1):142-47.
8. Clapp JF, Kim H, Burciu B, et al. Beginning regular exercise in early pregnancy: effect on fetoplacental growth. *American journal of obstetrics and gynecology* 2000;**183**(6):1484-88.
9. Clapp JF, Capeless EL. The changing glycemic response to exercise during pregnancy. *American journal of obstetrics and gynecology* 1991;**165**(6):1678-83.
10. Hopkins SA, Baldi JC, Cutfield WS, et al. Exercise training in pregnancy reduces offspring size without changes in maternal insulin sensitivity. *The Journal of Clinical Endocrinology & Metabolism* 2010;**95**(5):2080-88.
11. Harrod CS, Chasan-Taber L, Reynolds RM, et al. Physical activity in pregnancy and neonatal body composition: the Healthy Start study. *Obstetrics and gynecology* 2014;**124**(2 Pt 1):257-64.
12. Barker DJ, Godfrey KM, Gluckman PD, et al. Fetal nutrition and cardiovascular disease in adult life. *The Lancet* 1993;**341**(8850):938-41.
13. Barker D, Osmond C, Golding J, et al. Growth in utero, blood pressure in childhood and adult life, and mortality from cardiovascular disease. *Bmj* 1989;**298**(6673):564-67.
14. Martyn C, Barker D, Osmond C. Mothers' pelvic size, fetal growth, and death from stroke and coronary heart disease in men in the UK. *The Lancet* 1996;**348**(9037):1264-68.
15. Ravelli G-P, Stein ZA, Susser MW. Obesity in young men after famine exposure in utero and early infancy. *New England Journal of Medicine* 1976;**295**(7):349-53.
16. Hales CN, Barker DJ. Type 2 (non-insulin-dependent) diabetes mellitus: the thrifty phenotype hypothesis. *Diabetologia* 1992;**35**(7):595-601.
17. Phillips D. Relation of fetal growth to adult muscle mass and glucose tolerance. *Diabetic medicine* 1995;**12**(8):686-90.
18. O'Donovan SM, Murray DM, Hourihane JOB, et al. Cohort profile: the Cork BASELINE Birth Cohort Study: babies after SCOPE: evaluating the longitudinal impact on neurological and nutritional endpoints. *International journal of epidemiology* 2015;**44**(3):764-75.
19. North RA, McCowan LM, Dekker GA, et al. Clinical risk prediction for pre-eclampsia in nulliparous women: development of model in international prospective cohort. *Bmj* 2011;**342**:d1875.
20. McCarthy FP, Khashan AS, North RA, et al. A prospective cohort study investigating associations between hyperemesis gravidarum and cognitive, behavioural and emotional well-being in pregnancy. *PloS one* 2011;**6**(11):e27678.

21. McCowan LM, Dekker GA, Chan E, et al. Spontaneous preterm birth and small for gestational age infants in women who stop smoking early in pregnancy: prospective cohort study. *Bmj* 2009;**338**:b1081.
22. Orlando A, Dempster P, Aitkens S. A new air displacement plethysmograph for the measurement of body composition in infants. *Pediatric research* 2003;**53**(3):486-92.
23. Ellis KJ, Yao, M., Shypailo, R.J., Orlando, A., Wong, W.W., Heird, W.C. Body-composition assessment in infancy: air-displacement plethysmography compared with a reference 4-compartment model. *American Journal of Clinical Nutrition* 2007;**85**(1):5.
24. Roggero P, Gianni ML, Amato O, et al. Evaluation of air-displacement plethysmography for body composition assessment in preterm infants. *Pediatric research* 2012;**72**(3):316-20.
25. Bell RJ, Palma SM, Lumley JM. The Effect of Vigorous Exercise During Pregnancy on Birth-Weight. *Australian and New Zealand journal of obstetrics and gynaecology* 1995;**35**(1):46-51.
26. Hawkes CP, Hourihane JOB, Kenny LC, et al. Gender-and gestational age-specific body fat percentage at birth. *Pediatrics* 2011;**128**(3):e645-e51.
27. Textor J, Hardt J, Knüppel S. DAGitty: a graphical tool for analyzing causal diagrams. *Epidemiology* 2011;**22**(5):745.
28. Moodie EE, Stephens D. Using directed acyclic graphs to detect limitations of traditional regression in longitudinal studies. *International journal of public health* 2010;**55**(6):701-03.
29. Bodnar LM, Davidian M, Siega-Riz AM, et al. Marginal structural models for analyzing causal effects of time-dependent treatments: an application in perinatal epidemiology. *American Journal of Epidemiology* 2004;**159**(10):926-34.
30. Brotman RM, Klebanoff MA, Nansel TR, et al. A longitudinal study of vaginal douching and bacterial vaginosis—a marginal structural modeling analysis. *American journal of epidemiology* 2008;**168**(2):188-96.
31. Greenland S, Pearl J, Robins JM. Causal diagrams for epidemiologic research. *Epidemiology* 1999:37-48.
32. Ma G, Yao M, Liu Y, et al. Validation of a new pediatric air-displacement plethysmograph for assessing body composition in infants. *The American journal of clinical nutrition* 2004;**79**(4):653-60.
33. Yao M, Nommsen-Rivers L, Dewey K, et al. Preliminary evaluation of a new pediatric air displacement plethysmograph for body composition assessment in infants. *Acta diabetologica* 2003;**40**(1):s55-s58.
34. Agency IAE. Body Composition Assessment from Birth to Two Years of Age. IAEA Human Health Series. Vienna, 2013.
35. DiNallo JM, Downs DS, Masurier GL. Objectively assessing treadmill walking during the second and third pregnancy trimesters. *Journal of Physical Activity and Health* 2012;**9**(1):21-28.
36. Connolly CP, Coe, D., Kendrick, J.M., Bassett, D. & Thompson, D.L. Accuracy of Physical Activity Monitors in Pregnant Women. *Medicine and science in sports and exercise* 2010;**43**(6):1100-05.
37. Evenson KR, Chasan-Taber L, Symons Downs D, et al. Review of Self-reported Physical Activity Assessments for Pregnancy: Summary of the Evidence for Validity and Reliability. *Paediatric and perinatal epidemiology* 2012;**26**(5):479-94.
38. Harrison CL, Thompson RG, Teede HJ, et al. Measuring physical activity during pregnancy. *International Journal of Behavioral Nutrition and Physical Activity* 2011;**8**(1):1.
39. Evenson KR, Wen F. Measuring physical activity among pregnant women using a structured one-week recall questionnaire: evidence for validity and reliability. *International Journal of Behavioral Nutrition and Physical Activity* 2010;**7**(1):1.
40. Farrar D, Simmonds M, Bryant M, et al. Hyperglycaemia and risk of adverse perinatal outcomes: Systematic review and meta-analysis. *BMJ (Online)* 2016;**354** (no pagination)(i4694).
41. Poston L. Gestational weight gain: influences on the long-term health of the child. *Current Opinion in Clinical Nutrition & Metabolic Care* 2012;**15**(3):252-57.

- 1
- 2
- 3 42. Ireland Central Statistics Office. Census 2006 Volume 5- Ethnic or Cultural Background (including
- 4 the Irish Traveller Community), 2007.
- 5 43. Artal R, O'toole M. Guidelines of the American College of Obstetricians and Gynecologists for
- 6 exercise during pregnancy and the postpartum period. British journal of sports medicine
- 7 2003;**37**(1):6-12.
- 8 44. National Institute for Health and Care Excellence. NICE Clinical Guidelines, No. 62: Antenatal
- 9 Care: Routine Care for the Healthy Pregnant Woman. London: RCOG Press, 2008.
- 10 45. Clapp JF. Morphometric and neurodevelopmental outcome at age five years of the offspring of
- 11 women who continued to exercise regularly throughout pregnancy. The Journal of pediatrics
- 12 1996;**129**(6):856-63.
- 13
- 14
- 15
- 16
- 17
- 18
- 19
- 20
- 21
- 22
- 23
- 24
- 25
- 26
- 27
- 28
- 29
- 30
- 31
- 32
- 33
- 34
- 35
- 36
- 37
- 38
- 39
- 40
- 41
- 42
- 43
- 44
- 45
- 46
- 47
- 48
- 49
- 50
- 51
- 52
- 53
- 54
- 55
- 56
- 57
- 58
- 59
- 60

For peer review only

Supplementary table 1: Descriptive results for those vs those without PEAPOD measurements

|                                                                      | With PEAPOD<br>(n=1258) | Without PEAPOD<br>(n=513) | Difference (Cork_with<br>– Cork_without) (95%<br>CI) |
|----------------------------------------------------------------------|-------------------------|---------------------------|------------------------------------------------------|
| Sex of infant (% (n) female)                                         | 48.57 (611)             | 50.68 (260)               | -2.11 (-7.25; 3.02)*                                 |
| Birth weight (g) (median;IQR)                                        | 3500 (3180;3800)        | 3380 (3020;3730)          | 130 (80;190)**                                       |
| Gestational age (weeks) (median;IQR)                                 | 40.29 (39.43;41)        | 40 (38.71;40.86)          | 0.29 (0.15;0.43)**                                   |
| Maternal age (years) (mean:SD)                                       | 29.95 (4.44)            | 29.88 (4.61)              | 0.07 (-0.39;0.53)**                                  |
| Maternal BMI (kg/m <sup>2</sup> ) (median:IQR)                       | 23.9 (22;26.9)          | 24 (22;26.9)              | -0.1 (-0.30;0.50)**                                  |
| Maternal Socioeconomic status (median;IQR)                           | 45 (29;51)              | 45 (29;50)                | 0 (-1;0)**                                           |
| Maternal schooling (years) (median;IQR)                              | 13 (13;14)              | 13 (13;14)                | 0 (0;0)**                                            |
| Household income (<€21 000) (yes)(% (n))                             | 8.47 (106)              | 8.22 (42)                 | 0.25 (-2.58;3.10)*                                   |
| Maternal unemployment (yes) (% (n))                                  | 5.56 (70)               | 3.51 (18)                 | 2.06 (0.02;4.09)*                                    |
| 1 <sup>st</sup> trimester smoking (yes) (% (n))                      | 9.30 (117)              | 11.70 (60)                | -2.40 (-5.60;0.82)*                                  |
| 1 <sup>st</sup> trimester alcohol intake (units/week<br>(median;IQR) | 3 (0.6;7)               | 2.8 (0.62;5)              | 0 (-0.5;0)**                                         |

\*tests for proportions for categorical variables (% difference); \*\*t-tests/Wilcoxon rank-sum for continuous variables (difference in means/medians)



Supplementary table 2: Descriptive results for those with vs those without complete data

|                                                                       | Complete data group<br>(n=1200) | Missing data group<br>(n=58) | Difference (Complete –<br>incomplete)<br>(95% CI) |
|-----------------------------------------------------------------------|---------------------------------|------------------------------|---------------------------------------------------|
| Sex of infant (% (n) female)                                          | 49.00 (588)                     | 39.66 (23)                   | 9.34 -(3.56;22.25)*                               |
| Birth weight (g) (mean;SD)                                            | 3510 (465)                      | 3322 (518)                   | 188 (64;311)**                                    |
| Gestational age (weeks) (median;IQR)                                  | 40.29 (39.43;41.00)             | 40.57 (39.29;42.00)          | -0.43 (-0.86;0.15)**                              |
| Maternal age (years) (mean;SD)                                        | 29.98 (4.44)                    | 29.13 (4.54)                 | 0.85 (-0.33;2.02)**                               |
| Maternal BMI (kg/m <sup>2</sup> ) (median;IQR)                        | 23.9 (22.00;26.8)               | 24.7 (22.00;29.00)           | -0.70 (-1.90;0.40)**                              |
| Maternal Socioeconomic status (median;IQR)                            | 45 (29;51.00)                   | 44.5 (29;50.00)              | 0 (-3.00;4.00)**                                  |
| Maternal schooling (years) (median;IQR)                               | 13 (13;14)                      | 13 (13;14)                   | 0 (0;0)**                                         |
| Household income <€21 000 (yes) (% (n))                               | 8.30 (99)                       | 12.07 (7)                    | -3.77 (-12.30; 4.76)*                             |
| Maternal unemployment (yes) (% (n))                                   | 5.50 (66)                       | 6.90 (4)                     | -1.40 (-8.04;5.25)*                               |
| 1 <sup>st</sup> trimester smoking (yes) (% (n))                       | 9.08 (109)                      | 13.79 (8)                    | -4.71 (-13.73;4.31)*                              |
| 1 <sup>st</sup> trimester alcohol intake (units/week)<br>(median;IQR) | 3 (0.6;7)                       | 3 (0.6;10)                   | -0.10 (-1.5;0.67)**                               |

\*tests for proportions for categorical variables (% difference); \*\*t-tests/Wilcoxon rank-sum for continuous variables (difference in means/medians)

1  
2  
3  
4  
5  
6  
7  
8  
9  
10  
11  
12  
13  
14  
15  
16  
17  
18  
19  
20  
21  
22  
23  
24  
25  
26  
27  
28  
29  
30  
31  
32  
33  
34  
35  
36  
37  
38  
39  
40  
41  
42  
43  
44  
45  
46  
47

For peer review only

1  
2  
3  
4  
5  
6  
7  
8  
9  
10  
11  
12  
13  
14  
15  
16  
17  
18  
19  
20  
21  
22  
23  
24  
25  
26  
27  
28  
29  
30  
31  
32  
33  
34  
35  
36  
37  
38  
39  
40  
41  
42  
43  
44  
45  
46  
47  
48  
49  
50  
51  
52  
53  
54  
55

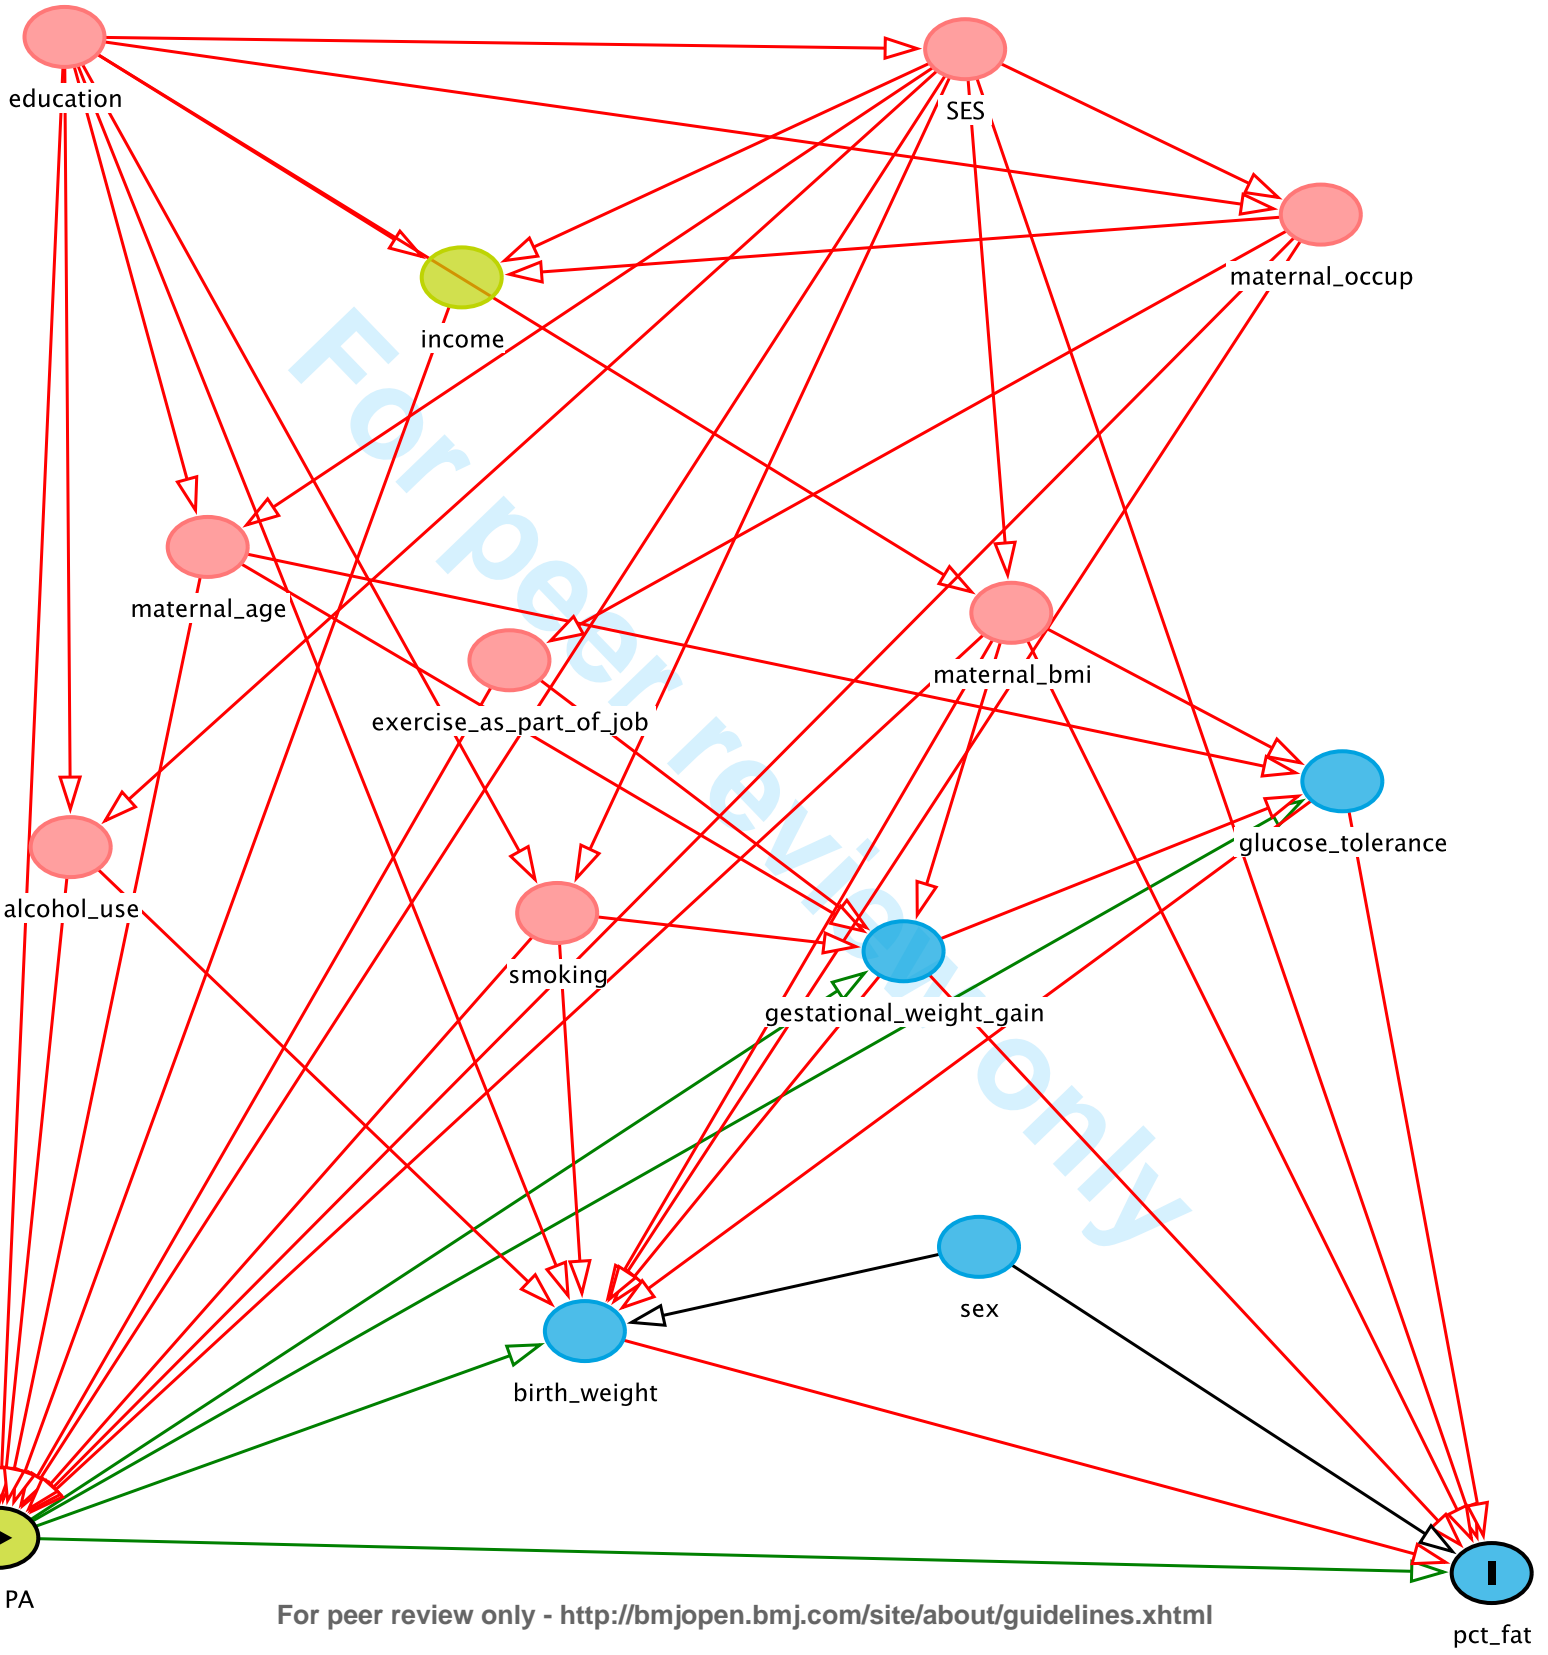

1  
2  
3  
4  
5  
6  
7  
8  
9  
10  
11  
12  
13  
14  
15  
16  
17  
18  
19  
20  
21  
22  
23  
24  
25  
26  
27  
28  
29  
30  
31  
32  
33  
34  
35  
36  
37  
38  
39  
40  
41  
42  
43  
44  
45  
46  
47  
48  
49  
50  
51  
52  
53  
54  
55  
56  
57  
58  
59  
60

## STROBE Statement—checklist of items that should be included in reports of observational studies

|                              | Item No | Recommendation                                                                                                                                                                             | Page |
|------------------------------|---------|--------------------------------------------------------------------------------------------------------------------------------------------------------------------------------------------|------|
| <b>Title and abstract</b>    | 1       | (a) Indicate the study's design with a commonly used term in the title or the abstract                                                                                                     | 1    |
|                              |         | (b) Provide in the abstract an informative and balanced summary of what was done and what was found                                                                                        | 2    |
| <b>Introduction</b>          |         |                                                                                                                                                                                            |      |
| Background/rationale         | 2       | Explain the scientific background and rationale for the investigation being reported                                                                                                       | 4    |
| Objectives                   | 3       | State specific objectives, including any prespecified hypotheses                                                                                                                           | 5    |
| <b>Methods</b>               |         |                                                                                                                                                                                            |      |
| Study design                 | 4       | Present key elements of study design early in the paper                                                                                                                                    | 6    |
| Setting                      | 5       | Describe the setting, locations, and relevant dates, including periods of recruitment, exposure, follow-up, and data collection                                                            | 6    |
| Participants                 | 6       | (a) <i>Cohort study</i> —Give the eligibility criteria, and the sources and methods of selection of participants. Describe methods of follow-up                                            | 6    |
|                              |         | <i>Case-control study</i> —Give the eligibility criteria, and the sources and methods of case ascertainment and control selection. Give the rationale for the choice of cases and controls |      |
|                              |         | <i>Cross-sectional study</i> —Give the eligibility criteria, and the sources and methods of selection of participants                                                                      |      |
|                              |         | (b) <i>Cohort study</i> —For matched studies, give matching criteria and number of exposed and unexposed                                                                                   |      |
|                              |         | <i>Case-control study</i> —For matched studies, give matching criteria and the number of controls per case                                                                                 |      |
| Variables                    | 7       | Clearly define all outcomes, exposures, predictors, potential confounders, and effect modifiers. Give diagnostic criteria, if applicable                                                   | 6-8  |
| Data sources/<br>measurement | 8*      | For each variable of interest, give sources of data and details of methods of assessment (measurement). Describe comparability of assessment methods if there is more than one group       | 6-7  |
| Bias                         | 9       | Describe any efforts to address potential sources of bias                                                                                                                                  | 7-8  |
| Study size                   | 10      | Explain how the study size was arrived at                                                                                                                                                  | 9    |
| Quantitative variables       | 11      | Explain how quantitative variables were handled in the analyses. If applicable, describe which groupings were chosen and why                                                               | 7    |
| Statistical methods          | 12      | (a) Describe all statistical methods, including those used to control for confounding                                                                                                      | 7-8  |
|                              |         | (b) Describe any methods used to examine subgroups and interactions                                                                                                                        | 7    |
|                              |         | (c) Explain how missing data were addressed                                                                                                                                                | 7    |
|                              |         | (d) <i>Cohort study</i> —If applicable, explain how loss to follow-up was addressed                                                                                                        |      |
|                              |         | <i>Case-control study</i> —If applicable, explain how matching of cases and controls was addressed                                                                                         |      |
|                              |         | <i>Cross-sectional study</i> —If applicable, describe analytical methods taking account of sampling strategy                                                                               |      |

1  
2  
3  
4  
5  
6  
7  
8  
9  
10  
11  
12  
13  
14  
15  
16  
17  
18  
19  
20  
21  
22  
23  
24  
25  
26  
27  
28  
29  
30  
31  
32  
33  
34  
35  
36  
37  
38  
39  
40  
41  
42  
43  
44  
45  
46  
47  
48  
49  
50  
51  
52  
53  
54  
55  
56  
57  
58  
59  
60

(e) Describe any sensitivity analyses

Continued on next page

For peer review only

| <b>Results</b>           |     | <b>Page</b>                                                                                                                                                                                                                                                                                                                                                                                                   |         |
|--------------------------|-----|---------------------------------------------------------------------------------------------------------------------------------------------------------------------------------------------------------------------------------------------------------------------------------------------------------------------------------------------------------------------------------------------------------------|---------|
| Participants             | 13* | (a) Report numbers of individuals at each stage of study—eg numbers potentially eligible, examined for eligibility, confirmed eligible, included in the study, completing follow-up, and analysed<br>(b) Give reasons for non-participation at each stage<br>(c) Consider use of a flow diagram                                                                                                               | 9       |
| Descriptive data         | 14* | (a) Give characteristics of study participants (eg demographic, clinical, social) and information on exposures and potential confounders<br>(b) Indicate number of participants with missing data for each variable of interest<br>(c) <i>Cohort study</i> —Summarise follow-up time (eg, average and total amount)                                                                                           | 9,11    |
| Outcome data             | 15* | <i>Cohort study</i> —Report numbers of outcome events or summary measures over time<br><i>Case-control study</i> —Report numbers in each exposure category, or summary measures of exposure<br><i>Cross-sectional study</i> —Report numbers of outcome events or summary measures                                                                                                                             |         |
| Main results             | 16  | (a) Give unadjusted estimates and, if applicable, confounder-adjusted estimates and their precision (eg, 95% confidence interval). Make clear which confounders were adjusted for and why they were included<br>(b) Report category boundaries when continuous variables were categorized<br>(c) If relevant, consider translating estimates of relative risk into absolute risk for a meaningful time period | 9,12-14 |
| Other analyses           | 17  | Report other analyses done—eg analyses of subgroups and interactions, and sensitivity analyses                                                                                                                                                                                                                                                                                                                | 13      |
| <b>Discussion</b>        |     |                                                                                                                                                                                                                                                                                                                                                                                                               |         |
| Key results              | 18  | Summarise key results with reference to study objectives                                                                                                                                                                                                                                                                                                                                                      | 15      |
| Limitations              | 19  | Discuss limitations of the study, taking into account sources of potential bias or imprecision. Discuss both direction and magnitude of any potential bias                                                                                                                                                                                                                                                    | 15      |
| Interpretation           | 20  | Give a cautious overall interpretation of results considering objectives, limitations, multiplicity of analyses, results from similar studies, and other relevant evidence                                                                                                                                                                                                                                    | 17-19   |
| Generalisability         | 21  | Discuss the generalisability (external validity) of the study results                                                                                                                                                                                                                                                                                                                                         | 17      |
| <b>Other information</b> |     |                                                                                                                                                                                                                                                                                                                                                                                                               |         |
| Funding                  | 22  | Give the source of funding and the role of the funders for the present study and, if applicable, for the original study on which the present article is based                                                                                                                                                                                                                                                 | 19      |

\*Give information separately for cases and controls in case-control studies and, if applicable, for exposed and unexposed groups in cohort and cross-sectional studies.

**Note:** An Explanation and Elaboration article discusses each checklist item and gives methodological background and published examples of transparent reporting. The STROBE checklist is best used in conjunction with this article (freely available on the Web sites of PLoS Medicine at <http://www.plosmedicine.org/>, Annals of Internal Medicine at <http://www.annals.org/>, and Epidemiology at <http://www.epidem.com/>). Information on the STROBE Initiative is available at [www.strobe-statement.org](http://www.strobe-statement.org).

# BMJ Open

**Do changing levels of maternal exercise during pregnancy affect neonatal adiposity? Secondary analysis of the Babies After SCOPE: Evaluating the Longitudinal Impact Using Neurological and Nutritional Endpoints (BASELINE) birth cohort (Cork, Ireland)**

|                                 |                                                                                                                                                                                                                                                                                                                                                                                                                                                                                                                                                                                                                                                                                                                            |
|---------------------------------|----------------------------------------------------------------------------------------------------------------------------------------------------------------------------------------------------------------------------------------------------------------------------------------------------------------------------------------------------------------------------------------------------------------------------------------------------------------------------------------------------------------------------------------------------------------------------------------------------------------------------------------------------------------------------------------------------------------------------|
| Journal:                        | <i>BMJ Open</i>                                                                                                                                                                                                                                                                                                                                                                                                                                                                                                                                                                                                                                                                                                            |
| Manuscript ID                   | bmjopen-2017-017987.R2                                                                                                                                                                                                                                                                                                                                                                                                                                                                                                                                                                                                                                                                                                     |
| Article Type:                   | Research                                                                                                                                                                                                                                                                                                                                                                                                                                                                                                                                                                                                                                                                                                                   |
| Date Submitted by the Author:   | 04-Sep-2017                                                                                                                                                                                                                                                                                                                                                                                                                                                                                                                                                                                                                                                                                                                |
| Complete List of Authors:       | Norris, Tom; University of Leicester College of Medicine Biological Sciences and Psychology, Health Sciences<br>McCarthy, Fergus; The Irish Centre for Fetal and Neonatal Translational Research (INFANT), Department of Obstetrics and Gynecology<br>Khashan, Ali; University College Cork, Department of Epidemiology and Public Health<br>Murray, Deidre; University College Cork, Paediatrics and Child Health<br>Kiely, Mairead; University College Cork, Food and Nutritional Sciences<br>Hourihane, Jonathan; University College, Cork, Ireland, Paediatrics and Child Health<br>Baker, Philip ; University of Leicester, College of Medicine<br>Kenny, Louise; University College Cork, Obstetrics and Gynaecology |
| <b>Primary Subject Heading</b>: | Epidemiology                                                                                                                                                                                                                                                                                                                                                                                                                                                                                                                                                                                                                                                                                                               |
| Secondary Subject Heading:      | Obstetrics and gynaecology                                                                                                                                                                                                                                                                                                                                                                                                                                                                                                                                                                                                                                                                                                 |
| Keywords:                       | adiposity, exercise, pregnancy, PEAPOD                                                                                                                                                                                                                                                                                                                                                                                                                                                                                                                                                                                                                                                                                     |
|                                 |                                                                                                                                                                                                                                                                                                                                                                                                                                                                                                                                                                                                                                                                                                                            |

SCHOLARONE™  
Manuscripts

1  
2  
3 Do changing levels of maternal exercise during pregnancy affect neonatal adiposity? Secondary  
4 analysis of the Babies After SCOPE: Evaluating the Longitudinal Impact Using Neurological and  
5 Nutritional Endpoints (BASELINE) birth cohort (Cork, Ireland).  
6  
7

8  
9 **Norris, T.,<sup>1</sup> McCarthy, F.P.,<sup>2,3</sup> Khashan, A.S.,<sup>2,4</sup> Murray, D.M.,<sup>2,5</sup> Kiely, M.,<sup>2,6</sup> Hourihane, J. O'B.,<sup>2,5</sup>**  
10 **Baker, P.N.,<sup>7\*</sup> & Kenny, L.C.<sup>2\*</sup>**  
11  
12

13  
14  
15 <sup>1</sup>Department of Health Sciences, College of Medicine, Biological Sciences and Psychology, University  
16 of Leicester, Leicester, LE1 7RH. [Tel: 0116 252 5439](tel:01162525439) email: [tom.norris@le.ac.uk](mailto:tom.norris@le.ac.uk)  
17

18  
19 <sup>2</sup>The Irish Centre for Fetal and Neonatal Translational Research (INFANT), University College Cork,  
20 Cork University Maternity Hospital, Wilton, Cork, Ireland and  
21

22  
23 <sup>3</sup>Division of Women's Health KCL, Women's Health Academic Centre KHP, St Thomas's Hospital,  
24 London.  
25

26  
27 <sup>4</sup>Department of Epidemiology and Public Health, University College Cork, Ireland  
28

29  
30 <sup>5</sup>Department of Paediatrics and Child Health, University College Cork  
31

32  
33 <sup>6</sup>Cork Centre for Vitamin D and Nutrition Research, School of Food and Nutritional Sciences,  
34 University College Cork  
35

36  
37 <sup>7</sup>College of Medicine, Biological Sciences and Psychology, University of Leicester, Leicester  
38

39  
40 (\*Joint senior authors)

41  
42 *on behalf of the SCOPE Ireland Cohort study and the Cork BASELINE Birth Cohort*  
43 *Study*  
44

45  
46  
47  
48 Address for correspondence: Department of Health Sciences, College of Medicine, Biological  
49 Sciences and Psychology, University of Leicester, Leicester, LE1 7RH. [Tel: 0116 252 5439](tel:01162525439) email:  
50 [tom.norris@le.ac.uk](mailto:tom.norris@le.ac.uk)  
51  
52



**Abstract:**

**Objective:** To investigate whether changing levels of exercise during pregnancy are related to altered neonatal adiposity. **Design:** Secondary analysis of data from a prospective cohort study.

**Setting:** Cork, Ireland. **Participants:** 1200 mother-infant pairs recruited as part of a prospective birth cohort, Babies After SCOPE: Evaluating the Longitudinal Impact Using Neurological and Nutritional Endpoints (BASELINE). **Main outcome measures:** Neonatal adiposity was assessed within several days of birth using air displacement plethysmography (PEAPOD). Percent body fat (BF%) as a continuous outcome and a pair of dichotomous variables; high or low adiposity, representing BF% >90<sup>th</sup> or <10<sup>th</sup> centile, respectively. Multivariable linear and logistic regression models were used to investigate the relationship between exercise and the respective outcomes. **Results:** Crude analysis revealed no association between a changing level of exercise (since becoming pregnant) at 15 weeks' gestation and any of the outcomes (%BF, low adiposity, high adiposity). At 20 weeks' gestation, analyses revealed that relative to women who do not change their exercise level up to 20 weeks, those women who decreased their exercise level were more likely to give birth to a neonate with adiposity above the 90<sup>th</sup> centile (OR: 1.62; 95% CI: 1.07; 2.46). This association was maintained after adjustment for putative confounders (OR: 1.62; 95% CI: 1.06; 2.47). **Conclusions:** We observed a possible critical period for the association between changing exercise levels and neonatal adiposity, with no association observed with exercise recall for the first 15 weeks of gestation, but an association with a decreasing level of exercise between 15 and 20 weeks. These results should be interpreted in line with the limitations of the study and further studies utilising objectively measured estimates of exercise are required in order to replicate these findings.

**Article Summary:***Strength and limitations of this study*

- Air displacement plethysmography (PEAPOD) was used to measure neonatal body composition
- Directed acyclic graphs (DAGs), based on an understanding of the causal network linking the variables in the analysis, were used to identify putative confounding variables
- Exercise variables were based on maternal self-report and therefore subject to error
- Pre-pregnancy exercise data were not available, meaning we were unable to ascertain what pre-pregnancy exercise level women had changed from

**Introduction:**

In their 2006 guideline, the Royal College of Obstetricians and Gynaecologists (RCOG) concluded that pregnant women should be 'encouraged to initiate or continue exercise to derive the health benefits associated with such activities'.<sup>1</sup>

The benefits of physical activity during pregnancy are likely to operate through an increased blood flow and oxygenation to the fetus.<sup>2,3</sup> It has also been proposed that the impact of exercise on fetal growth is mediated by its association with maternal insulin sensitivity, glucose metabolism and gestational weight gain.<sup>4,5</sup> Another mechanism by which exercise may be implicated is via the functioning of the uteroplacental unit, for example by affecting placental function, volume and growth rates.<sup>6-8</sup> However, the apparent beneficial associations of exercise appear to be dependent upon the timing of when exercise is undertaken. For example, Clapp et al (2002) demonstrated that women who performed a high quantity of moderate exercise in early pregnancy and then cut back in late pregnancy (hi-lo) delivered offspring who were heavier and longer at birth, compared to offspring of women who either did moderate volumes in both early and late pregnancy or a low volume followed by a high volume (lo-hi). The hi-lo exercise regimen was also associated with a greater placental volume at delivery, relative to the other two groups,<sup>7</sup> presumably as a result of faster placental growth in early gestation. Those who either maintained moderate exercise or increased to a high volume of exercise in late gestation (relative to the hi-lo group) did not exhibit this increased placental volume at birth, suggesting that early gestation is a critical period for any influence of exercise on placental development to be enacted, with a potentially suppressive association in late gestation.<sup>2</sup> Furthermore, it has been reported that the transient changes in glucose regulation observed after bouts of exercise differ depending on when in pregnancy the exercise load is occurring, with increases in blood glucose observed after exercise early in pregnancy, but decreases in later pregnancy.<sup>9</sup> These fluctuations in nutrient supply, depending on the timing of exercise, could also contribute to differential associations with fetal growth.

1  
2  
3 The data surrounding the associations between physical activity and neonatal body composition (as  
4  
5 opposed to size) from large scale observational studies is limited. Data from a limited number of  
6  
7 relatively small randomised controlled trials report either a null or reducing association between  
8  
9 physical activity and neonatal adiposity,<sup>7 8 10</sup> with potentially stronger associations if the exercise  
10  
11 intervention is administered at later gestations. Findings from a recent observational study, the  
12  
13 Healthy Start cohort (n=826), also suggested that increasing physical activity levels in later  
14  
15 pregnancy could be associated with a reduction in neonatal adiposity, even after adjusting for  
16  
17 putative confounders (e.g. maternal age, race or ethnicity, educational status, household income,  
18  
19 pre-pregnancy body mass index (BMI), and prenatal smoking status).<sup>11</sup>  
20  
21

22  
23 It is now well established that the *in utero* milieu experienced by the developing fetus could  
24  
25 influence long-term risk for the development of obesity and obesity-related non-communicable  
26  
27 diseases (OR-NCDs).<sup>12-14</sup> Maternal behaviour during this critical period of developmental plasticity  
28  
29 has the potential to permanently alter susceptibility to later chronic disease via alterations in the  
30  
31 offspring's metabolic and endocrinological phenotype.<sup>15-17</sup> Consequently, we hypothesise that  
32  
33 maternal exercise in pregnancy will be associated with altered neonatal adiposity, such that an  
34  
35 increasing/decreasing exercise level in pregnancy will be associated with a reduction/increase in  
36  
37 adiposity, respectively. Any changes in neonatal adiposity could be indicative of an altered  
38  
39 phenotypic profile in the offspring, which may increase susceptibility to later chronic disease.  
40  
41

42  
43 The objective of the current study was to investigate whether changes in maternal exercise during  
44  
45 pregnancy were associated with offspring adiposity in the neonatal period, measured using air  
46  
47 displacement plethysmography in a large homogeneous population.  
48  
49  
50  
51  
52  
53  
54  
55  
56  
57  
58  
59  
60

**Methods:**

Neonatal participants were recruited as part of the Cork BASELINE birth cohort study (ClinicalTrials.gov NCT: 01498965 [www.birthcohorts.net](http://www.birthcohorts.net))<sup>18</sup> between August 2008 and August 2011 from women who had participated in SCOPE (Screening for Pregnancy Endpoints) Ireland. SCOPE was a multicentre prospective cohort study with the aim of developing screening tests to predict various complications of pregnancy (e.g. pre-eclampsia, small-for-gestational-age (SGA) infants, and spontaneous preterm birth) (ACTRN12607000551493).<sup>19</sup> Methods are described in detail elsewhere.<sup>19 20</sup> In brief, participants were healthy nulliparous women with singleton pregnancies recruited antenatally between February 2007 and February 2011 in Cork, Ireland. Women were recruited, interviewed and all measurements obtained at 15±1 and 20±1 weeks' gestation.<sup>19 21</sup> Exclusion criteria included: a high risk for pre-eclampsia/delivery of a SGA neonate/spontaneous preterm birth because of underlying medical conditions; three or more previous miscarriages; three or more terminations of pregnancy; or having received interventions such as aspirin that might modify pregnancy outcome. At the time of interview, data were entered onto an internet-accessed central database with a complete audit trail designed and hosted by MedSciNet, Sweden. Participants were followed up prospectively, with pregnancy outcome data collected by trained research midwives.

Neonatal adiposity was assessed in the majority of neonates within 72 hours of birth by calculating neonatal body fat percentage (BF%) using the PEAPOD air displacement plethysmography. The mean time of measuring BF% in those infants born over 37 weeks' gestation was 1.8 days (standard deviation 0.97 days). Of those infants born <37 weeks' gestation, the mean time of testing was 2.4 days (standard deviation 1.2 days). Measurement of neonatal BF% involves direct measurement of body mass using precise scale and body volume in an airtight, enclosed chamber. Body composition assessment by densitometry involves the measurement of the density of the whole body. Body density is then used in a two-compartment model to calculate the percentage of fat, fat mass, and

1  
2  
3 fat-free mass.<sup>22</sup> The PEAPOD has excellent test-to-test reproducibility and is safe, non-invasive and  
4  
5 fast.<sup>23 24</sup>  
6  
7

8 Exercise data were collected at both the 15 and 20 week visits in a standardised manner. At both  
9  
10 time points, women were asked how many times per week they engaged in vigorous activity (which  
11  
12 made the woman breathe harder or puff or pant),<sup>25</sup> moderate activity (did not breathe harder or  
13  
14 puff or pant) or walking for recreation or exercise. At 15 weeks, women were asked: *'Has your level*  
15  
16 *of exercise (physical activity) changed since you've been pregnant?'*, to which they could respond  
17  
18 *'decreased', 'unchanged' or 'increased'*. At 20 weeks, women were then asked: *'Has your level of*  
19  
20 *exercise changed since last SCOPE visit?'*, with the same possible response options.  
21  
22

#### 23 *Statistical analysis:*

24  
25  
26 Differences in maternal characteristics and birth outcomes, stratified by change in exercise level,  
27  
28 were explored using one way analysis of variance for continuous variables (with scheffe test for  
29  
30 post-hoc pairwise comparisons) and chi<sup>2</sup> test for categorical variables (table 1). Descriptive statistics  
31  
32 (frequencies and percentages) of the different levels of exercise were summarised and are shown in  
33  
34 table 2. We generated a 'no exercise' binary variable with a value of 1 indicating women who  
35  
36 reported doing no vigorous nor moderate nor recreational walking activity per week.  
37  
38

39  
40 We used linear regression models to investigate the associations between changing levels of self-  
41  
42 reported maternal exercise during pregnancy and birthweight (g) and %BF measured as continuous  
43  
44 variables. Change in exercise levels was coded as a categorical variable: no change (reference group)  
45  
46 versus decreased versus increased. Regression diagnostics did not reveal any violations to linear  
47  
48 regression assumptions (i.e. normally distributed residuals and homogeneity of variance). We  
49  
50 subsequently generated separate binary variables (0= no; 1=yes) indicating the presence of either  
51  
52 low or high adiposity. Low and high adiposity was defined as below/above the gestational age- and  
53  
54 sex-specific 10<sup>th</sup>/90<sup>th</sup> adiposity centiles respectively, according to the centiles produced by Hawkes et  
55  
56  
57  
58  
59  
60

1  
2  
3 al (2011).<sup>26</sup> The associations between changes in physical activity and these dichotomous variables  
4  
5 were investigated using logistic regression models.  
6

7  
8 We performed sensitivity analyses limiting the sample to only those born at term (n=1180) and  
9  
10 separately, to those born non-low birthweight (>2500g) (n=1180) but estimates did not markedly  
11  
12 change and thus these infants were retained in the analysis. Furthermore, as the analysis sample  
13  
14 was based on those that had complete data for the exposure, outcome and covariates, we also  
15  
16 investigated whether we had introduced a selection bias by only including those with complete data  
17  
18 (supplementary tables 1 and 2).  
19

20  
21 In order to identify less biased associations between our exposures and outcome, we produced a  
22  
23 directed acyclic graph (DAG) using Daggity.<sup>27</sup> DAGs provide a method for formalising and clarifying  
24  
25 the causal hypothesised assumptions a researcher may make regarding the variables they wish to  
26  
27 analyse<sup>28</sup> and thus justify modelling choices.<sup>29 30</sup> These graphs are especially useful for identifying  
28  
29 variables which potentially confound the relationship between two variables, thus providing  
30  
31 researchers with sets of variables for which adjustment (and importantly non-adjustment) is  
32  
33 necessary, in order to obtain unbiased estimates of the relationship between a set of variables. For a  
34  
35 more detailed discussion on the use of these graphs in epidemiology, see Greenland, Pearl and  
36  
37 Robins.<sup>31</sup> Daggity is a web-based interface which allows researchers to construct and edit a directed  
38  
39 acyclic graph, with the ultimate aim of identifying sufficient sets of variables for adjustment which  
40  
41 will minimise bias when estimating the association between an exposure and outcome. The set of  
42  
43 variables identified by Daggity as necessary for adjustment were socioeconomic status, maternal  
44  
45 employment, smoking status, alcohol intake, BMI, level of education, maternal age and whether the  
46  
47 mother's job was physically active (see supplementary figure 1 for analysis DAG). These variables  
48  
49 were then incorporated into multivariable regression models. All analyses were conducted in  
50  
51 Stata/IC v14.1.  
52  
53  
54  
55  
56  
57  
58  
59  
60

**Results:***Descriptive statistics of the sample (and those omitted)*

Compared to all of those enrolled without a PEADOD measurement (n=513) cohort, those enrolled in Cork with a PEAPOD measurement taken (n=1258) were approximately 130g (95% CI: 80-190) heavier and born approximately 2 days later (95% CI: 1.05-3.01), but with no differences in any maternal biological or demographic data (Supplementary table 1). Although 1258 had PEAPOD measurements taken, 58 infants were not included in the final analysis due to: all PEAPOD data being lost/mis-entered (n=16), being born too early or late for adiposity centiles to be generated (n=23) and having incomplete exposure and covariate data (n=19), leaving a final analysis sample of 1200. Compared to those with PEAPOD measurements but not in the final analysis sample, those who were in the final analysis had higher birthweight (187.81; 95% CI: 64.45-311.17), but with no differences in gestational age or any maternal biological or demographic data (Supplementary table 2).

Of the 1200 neonates with complete exposure, outcome and covariate data, 612 (51.00%) were male and 98.25% (n=1 179) were of White European ethnic origin. The mean birthweight was 3510g (95% CI: 3484 - 3537) and the median gestational age was 40 weeks (interquartile range: 39 - 41).

*Change in exercise level reported in the first 15 weeks of pregnancy*

Table 1 provides descriptive statistics for various maternal characteristics and neonatal outcomes, stratified by type of change of exercise in pregnancy. Compared to women who reported no change in exercise level, those who decreased their level of exercise were older (30.51 years (4.17) vs. 28.89 years (4.74)), with a higher level socioeconomic status (44.33 (16.15) vs. 39.10 (15.40)), less likely to have a household income below €21 000 (5.80% vs. 13.16%) and less likely to have smoked during the first trimester (6.03% vs. 15.90%). The small proportion of women who reported increasing their



1  
2  
3 exercise levels from the time they became pregnant to 15 weeks gestation (<4%) did not differ  
4  
5 substantially from the cohort, with the exception of having a higher likelihood of a lower household  
6  
7 income (Table 1).  
8  
9

10 It is shown in Table 2 that at 15 weeks' gestation, more than a quarter (n=327, 27.25%) of women  
11  
12 reported engaging in vigorous exercise at least once per week, with approximately three quarters  
13  
14 reporting doing some form of moderate exercise per week (n=892, 74.33%). 104 (8.67%) women  
15  
16 reported not engaging in any form of exercise per week.  
17  
18

19 The associations between changing exercise levels and birthweight and neonatal adiposity are  
20  
21 shown in Table 3. Relative to women who did not change their exercise level in pregnancy up to 15  
22  
23 weeks, there was no difference in any of the outcomes in those women who either increased or  
24  
25 decreased their level of exercise, in both crude and adjusted analyses. Changing the reference group  
26  
27 in order to compare those who decreased relative to those who increased also revealed no  
28  
29 differences in neonatal outcomes.  
30  
31  
32  
33  
34  
35  
36  
37  
38  
39  
40  
41  
42  
43  
44  
45  
46  
47  
48  
49  
50  
51  
52  
53  
54  
55  
56  
57  
58  
59  
60

Table 1: Descriptive statistics in those with changing levels of physical activity during pregnancy

|                                                                   | Change in exercise level in pregnancy to 15 weeks (n=1200)     |                            |                           |
|-------------------------------------------------------------------|----------------------------------------------------------------|----------------------------|---------------------------|
|                                                                   | Decreased (n=813 (67.8%))                                      | Unchanged (n=346(28.8%))   | Increased (n=41 (3.4%))   |
| <b>Maternal characteristics:</b>                                  |                                                                |                            |                           |
| Maternal age (mean;SD)                                            | 30.51 (4.17) <sup>†</sup>                                      | 28.89 (4.74)               | 28.88 (5.19)              |
| Maternal BMI at 15 weeks (mean;SD)                                | 25.02 (4.12)                                                   | 24.49 (4.21)               | 24.18 (3.85)              |
| Maternal years schooling (mean;SD)                                | 13.27 (0.83)                                                   | 13.18 (0.81)               | 13.15 (0.73)              |
| Maternal socioeconomic status (mean;SD)                           | 44.33 (16.15) <sup>†</sup>                                     | 39.10 (15.40)              | 43.51 (16.35)             |
| Maternal household income <€21 000 (n:%)                          | 47 (5.80) <sup>†‡</sup>                                        | 45 (13.16)                 | 7 (17.07)                 |
| Maternal smoking in 1 <sup>st</sup> trimester (n:%)               | 49 (6.03) <sup>†</sup>                                         | 55 (15.90)                 | 5 (12.20)                 |
| Maternal alcohol intake in 1 <sup>st</sup> trimester (units/week) | 4.61 (5.76)                                                    | 5.39 (6.97)                | 5.99 (8.10)               |
| <b>Birth outcomes:</b>                                            |                                                                |                            |                           |
| Gestational age (weeks) (mean;SD)                                 | 40 (1.16)                                                      | 40 (1.24)                  | 40 (1.00)                 |
| Birth weight (g) (mean;SD)                                        | 3525 (460)                                                     | 3471 (478)                 | 3541 (449)                |
| Neonatal adiposity (%) (mean;SD)                                  | 11.06 (4.15)                                                   | 11.03 (4.06)               | 11.22 (4.13)              |
| Adiposity<10 <sup>th</sup> centile (yes) (n:%)                    | 68 (8.36)                                                      | 26 (7.51)                  | 3 (7.32)                  |
| Adiposity>90 <sup>th</sup> centile (yes) (n:%)                    | 86 (10.58)                                                     | 39 (11.27)                 | 7 (17.07)                 |
|                                                                   | Change in exercise level in pregnancy: 15 to 20 weeks (n=1200) |                            |                           |
|                                                                   | Decreased (n=263 (21.9%))                                      | Unchanged (n=665 (55.4%))  | Increased (n=272 (22.7%)) |
| <b>Maternal characteristics:</b>                                  |                                                                |                            |                           |
| Maternal age (mean;SD)                                            | 30.74 (4.13) <sup>†</sup>                                      | 29.52 (4.58) <sup>‡</sup>  | 30.39 (4.25)              |
| Maternal BMI at 15 weeks (mean;SD)                                | 25.07 (4.06)                                                   | 24.60 (4.01)               | 25.20 (4.52)              |
| Maternal years schooling                                          | 13.28 (0.72)                                                   | 13.23 (0.86)               | 13.22 (0.82)              |
| Maternal socioeconomic status                                     | 44.33 (15.49) <sup>†</sup>                                     | 40.96 (16.08) <sup>‡</sup> | 45.79 (16.21)             |
| Maternal household income <€21 000 (n:%)                          | 15 (5.70) <sup>†</sup>                                         | 66 (10.03)                 | 18 (6.62)                 |
| Maternal smoking in 1 <sup>st</sup> trimester (n:%)               | 23 (8.75)                                                      | 73 (10.98) <sup>‡</sup>    | 13 (4.78)                 |
| Maternal alcohol intake in 1 <sup>st</sup> trimester (units/week) | 4.91 (5.79)                                                    | 5.24 (6.82) <sup>‡</sup>   | 3.98 (5.01)               |
| <b>Birth outcomes:</b>                                            |                                                                |                            |                           |
| Gestational age (weeks) (mean;SD)                                 | 40 (1.20)                                                      | 40 (1.19)                  | 40 (1.14)                 |
| Birth weight (g) (mean;SD)                                        | 3541 (498)                                                     | 3487 (458)                 | 3537 (448)                |
| Neonatal adiposity (%) (mean;SD)                                  | 11.44 (4.66)                                                   | 10.90 (4.02)               | 11.08 (3.79)              |
| Adiposity<10 <sup>th</sup> centile (yes) (n:%)                    | 22 (8.37)                                                      | 58 (8.87)                  | 16 (5.88)                 |
| Adiposity>90 <sup>th</sup> centile (yes) (n:%)                    | 41 (15.59)                                                     | 68 (10.23)                 | 23 (8.46)                 |

<sup>†</sup>different to 'unchanged' <sup>‡</sup>different to 'increased'

Table 2: Descriptive statistics of self-reported activity levels at 15 and 20 weeks

|                                                          | Exercise level at 15 weeks (n=1200)                 | Exercise level at 20 weeks (n=1200) |                   |
|----------------------------------------------------------|-----------------------------------------------------|-------------------------------------|-------------------|
| Vigorous at least once per week (yes) (n; % of 1200)     | 327 (27.25)                                         | 377 (31.42)                         |                   |
| Moderate at least once per week (yes) (n; % of 1200)     | 892 (74.33)                                         | 908 (75.67)                         |                   |
| Recreational at least once per week (yes) (n; % of 1200) | 1040 (86.67)                                        | 1057 (88.08)                        |                   |
| No exercise per week (n; % of 1200)                      | 104 (8.67)                                          | 100 (8.33)                          |                   |
|                                                          | <i>Change in exercise level between 15-20 weeks</i> |                                     |                   |
|                                                          | Decreased (n=263)                                   | Unchanged (n=665)                   | Increased (n=272) |
| Any exercise per week at 15 weeks                        |                                                     |                                     |                   |
| No (n; % of column total)                                | 7 (2.66)                                            | 72 (10.83)                          | 25 (9.19)         |
| Yes (n; % of column total)                               | 256 (97.34)                                         | 593 (89.17)                         | 247 (90.81)       |

1  
2  
3 *Change in exercise level between 15 and 20 weeks*  
4

5  
6 Compared to women who reported no change in exercise level between 15 and 20 weeks, those  
7  
8 who decreased their level of exercise were older (30.74 years (4.13) vs. 29.52 years (4.58)), with a  
9  
10 higher level socioeconomic status (44.33 (15.49) vs. 40.96 (16.08)) and less likely to have a  
11  
12 household income below €21 000 (n=15 (5.70%) vs. n=66 (10.03%)). Women who increased their  
13  
14 exercise levels between 15 and 20 weeks, relative to those who reported no change, were also older  
15  
16 and with a higher SES, with a reduced alcohol intake (3.98 (5.01) units/week vs. 5.24 (6.82)  
17  
18 units/week) and lower likelihood of smoking during the 1<sup>st</sup> trimester (n=13 (4.78%) vs. n=73 (10.98%)  
19  
20 (Table 1).  
21

22  
23 At 20 weeks, similar levels of exercise were reported, with approximately 30% of women reporting  
24  
25 doing vigorous exercise at least once per week, and three quarters of the sample engaging in some  
26  
27 form of moderate exercise. Just over 8% of women reported taking part in no form of exercise at 20  
28  
29 weeks (Table 2). Table 2 also reveals that of the 665 women who reported no change in their  
30  
31 exercise levels between 15-20 weeks, approximately 10% of these (n=72) had engaged in no exercise  
32  
33 at 15 weeks. Similarly, of those who increased their exercise levels between 15-20 weeks, just under  
34  
35 10% (n=25) had reported no exercise at 15 weeks (Table 2).  
36  
37

38  
39 Crude analysis shows that relative to women who do not change their exercise level between 15 and  
40  
41 20 weeks, those women who decreased their exercise level were more likely to give birth to a  
42  
43 neonate with adiposity above the 90<sup>th</sup> centile (OR: 1.62; 95% CI:1.07; 2.46) (Table 3). This association  
44  
45 was maintained after adjustment for the putative confounders (OR: 1.66; 95% CI: 1.09; 2.54). When  
46  
47 changing the reference group in order to compare women who decreased exercise levels relative to  
48  
49 those who increased exercise, it was observed that those who decreased were twice as likely to give  
50  
51 birth to a neonate with an adiposity above the 90<sup>th</sup> centile (OR: 2.00; 95% CI: 1.16 - 3.44), which  
52  
53 again was also maintained on adjustment (OR: 2.09; 95% CI: 1.20 - 3.61). Birthweight was not  
54  
55 associated with differences in exercise (Table 3).  
56  
57  
58  
59  
60

Table 3: Associations between changing exercise levels during pregnancy and birthweight and neonatal adiposity

|                                       | Change in exercise level in pregnancy to 15 weeks (coefficient; 95%CI)     |             |                        |                        |             |                        |
|---------------------------------------|----------------------------------------------------------------------------|-------------|------------------------|------------------------|-------------|------------------------|
|                                       | Crude                                                                      |             |                        | Multivariable***       |             |                        |
|                                       | Decreased                                                                  | Unchanged   | Increased              | Decreased              | Unchanged   | Increased              |
| Birthweight (g)*                      | 54.39 (-4.16; 112.93)                                                      | (reference) | 70.24 (-80.40; 220.89) | 22.03 (-37.61; 81.67)  | (reference) | 74.40 (-75.84; 224.64) |
| Neonatal adiposity (%)*               | 0.03 (-0.49; 0.55)                                                         | (reference) | 0.19 (-1.15; 1.53)     | 0.01 (-0.52; 0.55)     | (reference) | 0.33 (-1.01; 1.67)     |
| Adiposity <10 <sup>th</sup> centile** | 1.12 (0.70; 1.80)                                                          | (reference) | 0.97 (0.28; 3.36)      | 1.20 (0.73; 1.95)      | (reference) | 0.82 (0.23; 2.94)      |
| Adiposity >90 <sup>th</sup> centile** | 0.93 (0.62; 1.39)                                                          | (reference) | 1.62 (0.67; 3.90)      | 0.96 (0.62; 1.41)      | (reference) | 1.75 (0.71; 4.31)      |
|                                       | Change in exercise level in pregnancy: 15 to 20 weeks (coefficient; 95%CI) |             |                        |                        |             |                        |
|                                       | Crude                                                                      |             |                        | Multivariable***       |             |                        |
|                                       | Decreased                                                                  | Unchanged   | Increased              | Decreased              | Unchanged   | Increased              |
| Birthweight (g)*                      | 54.47 (-11.96; 120.90)                                                     | (reference) | 50.11 (-15.53; 115.75) | 42.68 (-23.62; 108.98) | (reference) | 22.30 (-43.49; 88.09)  |
| Neonatal adiposity (%)*               | 0.54 (-0.05; 1.13)                                                         | (reference) | 0.18 (-0.40; 0.76)     | 0.56 (-0.03; 1.15)     | (reference) | 0.13 (-0.46; 0.72)     |
| Adiposity <10 <sup>th</sup> centile** | 0.94 (0.56; 1.56)                                                          | (reference) | 0.64 (0.36; 1.14)      | 0.94 (0.56; 1.59)      | (reference) | 0.69 (0.39; 1.24)      |
| Adiposity >90 <sup>th</sup> centile** | 1.62 (1.07; 2.46)                                                          | (reference) | 0.81 (0.49; 1.33)      | 1.66 (1.09; 2.54)      | (reference) | 0.80 (0.48; 1.32)      |

\*Linear regression for continuous outcomes (β); \*\*logistic regression for dichotomous outcomes (OR) \*\*\*adjusted for: socioeconomic status, years of schooling, employment status, maternal BMI, smoking in 1st trimester, alcohol intake in 1st trimester, maternal age, exercise as part of job

## Discussion

In this cohort of white European mother-offspring pairs, we report the association between changing levels of exercise during pregnancy and neonatal adiposity measured using air displacement plethysmography (PEAPOD). We observed that pregnant women who reported a decrease in exercise levels between 15 and 20 weeks, had a 60% higher risk of having a baby with adiposity above the 90<sup>th</sup> centile when compared with women who reported no change. This risk was approximately double when women who reported a decrease in exercise levels between 15 and 20 weeks were compared to women who reported an increase in exercise levels. This association was maintained after adjustment for a set of putative confounders including maternal education, employment status, smoking, alcohol intake, BMI socioeconomic status, maternal age and whether her occupation was physically active. This positive association between decreased exercise level and adiposity was also observed when adiposity was assessed as a continuous variable, though the 95% confidence interval did include the null. The exercise-adiposity association was only apparent between 15 and 20 weeks and not for changing exercise levels prior to 15 weeks, raising the possibility that there is a potential critical period with regard to the association between changes in exercise level and the development of offspring adiposity.

A major strength of the study is the use of air-displacement plethysmography for the estimates of body composition. This method is a quick, safe and non-invasive technique, which has shown to be a reliable and accurate instrument for determining body fat percentage in infants.<sup>23 32 33</sup> As such, it has been deemed the primary method for measuring body density in paediatric populations.<sup>34</sup> Inter-observer variability was reduced by having a small, highly trained team of midwives and researchers who conducted all of the assessments to strict protocols. However, repeated measurements were not performed and thus we were unable to assess intra-observer variability. The prospective design of the cohort, allowing us to comprehend the temporal relationship between variables and the rich collection of covariates available for adjustment further strengthens the study. Another strength of this study is the use of a directed acyclic graph (DAG) which is based on an understanding of the

1  
2  
3 causal network linking the variables in the analysis. As such, the DAG allows for the appropriate  
4  
5 adjustment for a set of putative confounders in order to obtain a less biased estimate of the  
6  
7 association between changing levels of exercise and neonatal adiposity. We are, however, cautious  
8  
9 not to refer to any association as 'causal' as we cannot exclude the possibility of the presence of  
10  
11 both residual confounding and, in particular with this subjective measurement of exercise,  
12  
13 measurement error.  
14

15  
16 Arguably the greatest limitation is the subjective nature of the exercise data. Whilst the  
17  
18 questionnaire regarding physical exercise was not validated for any population, the definition of  
19  
20 vigorous exercise (daily exercise leading to heavy breathing or being out of breath) has previously  
21  
22 been used in other studies.<sup>25</sup> As the exercise variables were based on maternal report, this  
23  
24 introduced a potential error due to women not accurately remembering their exercise levels (e.g.  
25  
26 due to social desirability of reporting higher levels or age). The recall period was relatively short,  
27  
28 considering only the very recent past, and focussed on habitual activity, thus reducing the extent of  
29  
30 the error introduced. An objectively measured assessment of physical activity (e.g. an  
31  
32 accelerometer), would have been of benefit to estimate actual activity. Nonetheless, in large-scale  
33  
34 cohort studies a compromise is often sought, with participant burden and cost-effectiveness on the  
35  
36 one side and a more precisely measured variable on the other. Furthermore, it has been reported  
37  
38 that pregnant women may wear monitors placed at the hip incorrectly due to changes in their girth.  
39  
40  
41  
42 <sup>35 36</sup> Accordingly, a recent systematic review found that in epidemiological studies amongst pregnant  
43  
44 women, self-reported physical activity measures were the most common assessment method.<sup>37</sup>  
45  
46 Research on agreement between subjective estimates of physical activity and objectives measures  
47  
48 has generated mixed results,<sup>38 39</sup> with the same systematic review concluding that the agreement  
49  
50 between questionnaires and objective measures of physical activity assessment, ranged from 'poor  
51  
52 to substantial'.<sup>37</sup>  
53  
54  
55  
56  
57  
58  
59  
60

1  
2  
3 A related limitation is that, as recruitment commenced during pregnancy, pre-pregnancy exercise  
4 data was not available and as a result we were unable to determine what pre-pregnancy exercise  
5 level women had changed from. It could be speculated that women who reported no change in  
6 activity level at 15 weeks did not do any exercise to start with. We have shown that those women  
7 whose activity remained unchanged at 15 weeks (compared to those who decreased) were more  
8 likely to smoke during the first trimester, be of lower socioeconomic status and more likely to have a  
9 lower household income, all of which are associated with reduced levels of exercise and fetal  
10 growth. Whilst we adjusted for these confounding factors, the lack of baseline activity limits the  
11 interpretability of our findings. For example, it would have been interesting to determine whether  
12 the observed association between a decreasing exercise level (vs. unchanged level) and neonatal  
13 adiposity was the same across differing categories of baseline activity.  
14  
15

16  
17 We were unable to adjust our estimates for the likely mediating role of gestational hyperglycaemia  
18 as these data were not available. Similarly, we did not adjust our estimates for gestational weight  
19 gain. In line with the published literature<sup>4 5 40 41</sup>, these variables are likely to operate along the causal  
20 pathway between maternal exercise and neonatal adiposity. While adjusting for them may mask  
21 part of the association between exercise and adiposity, it would have been of benefit to conduct a  
22 *priori* analysis to examine whether a change exercise was associated with neonatal adiposity  
23 independently of pre-pregnancy obesity, gestational weight gain or impaired glycaemic control.  
24 Acknowledging these data gaps, the current paper did not aim to elucidate possible mechanisms by  
25 which the association between exercise and adiposity is enacted, rather, we aimed to identify  
26 whether an association existed at all.  
27  
28

29  
30 A final limitation is the potential lack of generalisability of our results to other groups. For example,  
31 study recruitment was limited to primiparous women with singleton pregnancies and notably, a  
32 majority of White European gravidas (approximately 98.25%) were recruited into the study. This  
33 predominance of White European gravidas does, however, reflect the demographic profile of  
34  
35  
36  
37  
38  
39  
40  
41  
42  
43  
44  
45  
46  
47  
48  
49  
50  
51  
52  
53  
54  
55  
56  
57  
58  
59  
60



1  
2  
3 females aged 15 to 44 in Ireland as a whole (95%).<sup>42</sup> Unfortunately, a number of infants (513/1771)  
4  
5 were unable to have a body composition assessment. Possible reasons for this include a lag period  
6  
7 between the start of the study and the arrival of the PEAPOD, and admittance of the infant to the  
8  
9 neonatal intensive care unit (NICU). We have shown that although these infants differed slightly in  
10  
11 terms of birthweight (median difference: 130g; 95% CI: 80-190g) and gestational age (median  
12  
13 difference: 0.29 weeks; 95% CI: 0.15 - 0.43 weeks), there were no differences in the maternal  
14  
15 characteristics of those with and without a PEAPOD measurement (supplementary table 1), and thus  
16  
17 we are confident we have not introduced a substantial selection bias into the analysis. The  
18  
19 employment of a complete-case analysis could also have introduced a degree of selection bias into  
20  
21 the analysis, however, supplementary table 2 shows that, apart from birthweight, there no  
22  
23 differences in the offspring or maternal characteristics of those with complete vs. incomplete data.  
24  
25  
26  
27 To the authors' knowledge, this is the first study looking at the association between changing  
28  
29 exercise levels in pregnancy and neonatal adiposity using air displacement plethysmography.  
30  
31 Previous studies have either used different measurement techniques (sum of skinfolds<sup>7 8</sup> or dual-  
32  
33 energy x-ray absorptiometry (DXA)<sup>10</sup>) or were not looking at changing levels of exercise.<sup>11</sup> A recent  
34  
35 large observational study observed that the lowest quartile of late-pregnancy energy expenditure  
36  
37 was associated with a substantially higher neonatal fat mass (290.5g vs 249.4g, p=0.03) within the  
38  
39 first 72-hours, which was not mirrored in neonatal fat-free mass<sup>11</sup>. Unlike our study, however, no  
40  
41 differences were observed in either mid- or early pregnancy. However, the aforementioned study  
42  
43 was not investigating intra-pregnancy change and also relied on a statistically driven method to  
44  
45 identify potential confounders, ignoring the causal framework underpinning any possible  
46  
47 associations.  
48  
49

50  
51 We observed a possible critical period for the association between changing exercise levels and  
52  
53 neonatal adiposity, with no association observed with exercise recall for the first 15 weeks of  
54  
55 gestation, but an association between a decreasing level of exercise between 15 and 20 weeks. This  
56  
57  
58  
59  
60

1  
2  
3 provides support for the findings of Clapp et al,<sup>7</sup> who found that women who performed a high  
4  
5 volume of moderate exercise in early pregnancy and then cut back in late pregnancy delivered  
6  
7 offspring who were heavier and longer at birth, compared to offspring of women who either did  
8  
9 moderate volumes in both early and late pregnancy or a low volume followed by a high volume.<sup>7</sup>  
10  
11 Indeed in our study we observed a markedly increased risk of delivering an infant with neonatal  
12  
13 adiposity above the 90<sup>th</sup> centile in pregnant women who reported having increased their exercise  
14  
15 levels up to 15 weeks, but then reported a decrease between 15 and 20 weeks, relative to those  
16  
17 who reported no change at both time points (OR: 5.87; 95% CI: 1.74-19.80, data not shown), though  
18  
19 the uncertainty of this estimate can be observed in the wide confidence interval, reflecting the small  
20  
21 number of women on which this finding was based.  
22  
23

24  
25 The data presented here suggest that a reduction in exercise levels may lead to less favourable  
26  
27 outcomes in terms of neonatal adiposity. As such, and given the evidence of maintaining pre-  
28  
29 pregnancy exercise levels<sup>43 44</sup>, we advocate the continuation of pre- and early pregnancy exercise  
30  
31 levels into later pregnancy. Further studies utilising objectively measured estimates of physical  
32  
33 activity in a range of different population groups are required in order to replicate this finding. For  
34  
35 example, the cohort of women in this analysis exhibited relatively low levels of activity, with almost  
36  
37 75% of women never doing any vigorous activity at 15 weeks and only approximately 50% of the  
38  
39 women doing moderate activity more than once a week. If results appear consistent and robust to  
40  
41 these differences in methodology and population, then these findings have significant implications,  
42  
43 which extend beyond the short-term. For example, it has been shown that the associations between  
44  
45 maternal pregnancy exercise levels and offspring adiposity present at birth extend into childhood,  
46  
47 with children of women who exercised during pregnancy observed to have a reduced fat mass at age  
48  
49 5 years (37mm ± 1 vs. 44mm ± 4) compared children whose mothers were inactive<sup>45</sup>. However, the  
50  
51 overall lack of follow-up studies with body composition assessment at birth limits our ability to  
52  
53 explicitly link increased adiposity in early-life and later risk. Nonetheless, if the effects of a reduced  
54  
55 level of exercise are able to manifest in the offspring as an altered adiposity at birth, the wider  
56  
57  
58  
59  
60

1  
2  
3 implication is that, during this critical period of developmental plasticity, some sort of programing  
4  
5 has occurred, potentially permanently altering the offspring's metabolic and endocrinological  
6  
7 phenotype (13-15),<sup>15-17</sup> and altering its long-term susceptibility to a variety of non-communicable  
8  
9 diseases (NCDs). It is hoped that with the increasing incorporation of body composition assessment  
10  
11 methods in infancy, particularly air-displacement plethysmography, these questions will be able to  
12  
13 be investigated.

#### 14 15 16 17 **Conclusion:**

18  
19 A decreasing level of maternal reported exercise between 15 and 20 weeks' gestation was  
20  
21 associated with an increased risk of delivering an infant with a high adiposity. This association was  
22  
23 maintained after appropriate adjustment for confounding variables as identified using knowledge of  
24  
25 the causal network. However, these findings need interpreting in line with the limitations of the  
26  
27 study. Accordingly, further research utilising objective measures of physical activity and in different  
28  
29 populations needs to be conducted in order to validate results.

#### 30 31 32 33 **Acknowledgements:**

34  
35 We thank the pregnant women who participated in the SCOPE study and the mothers who allowed  
36  
37 their newborn infants to participate in the BASELINE study.

#### 38 39 40 41 **Funding:**

42  
43 SCOPE Ireland was funded by the Health Research Board, Ireland (CSA 2007/2). The BASELINE cohort  
44  
45 was supported by the National Children's Research Centre, Dublin, Ireland, and the Food Standards  
46  
47 Agency of the United Kingdom (grant no. TO7060). SCOPE and BASELINE are supported by INFANT,  
48  
49 an SFI funded Research Centre (grant no 12/RC/2272). The funders had no involvement in the study  
50  
51 design, data collection, analysis and interpretation, as well as in the writing of the manuscript.

#### 52 53 54 55 56 **Competing interests:**

1  
2  
3 None declared.  
4  
5

6 **Contribution to authorship:**  
7

8 LCK is guarantor. TN designed the study, analysed and interpreted the data, alongside LCK and PNB.  
9

10 TN, AK, FMC, DMM, MK, J O'B H, LCK and PNB took part in drafting the article or revising it for  
11  
12 critically important intellectual content and all gave final approval of the version to be published.  
13  
14

15 **Ethics approval:**  
16

17  
18 Ethical approval was obtained from the local ethics committees (Cork ECM5(10)05/02/08; approved  
19  
20 5 February 2008) and all women provided written informed consent.  
21  
22

23 **Data sharing statement:** There are no additional data available.  
24  
25  
26  
27  
28  
29  
30  
31  
32  
33  
34  
35  
36  
37  
38  
39  
40  
41  
42  
43  
44  
45  
46  
47  
48  
49  
50  
51  
52  
53  
54  
55  
56  
57  
58  
59  
60

## References

1. Royal College of Obstetricians and Gynaecologists. Exercise in Pregnancy. RCOG Statement No 4, 2006.
2. Hopkins SA, Cutfield WS. Exercise in pregnancy: weighing up the long-term impact on the next generation. *Exercise and sport sciences reviews* 2011;**39**(3):120-27.
3. Pivarnik JM, Mauer MB, Ayres NA, et al. Effects of chronic exercise on blood volume expansion and hematologic indices during pregnancy. *Obstetrics & Gynecology* 1994;**83**(2):265-69.
4. Russo LM, Nobles C, Ertel KA, et al. Physical activity interventions in pregnancy and risk of gestational diabetes mellitus: a systematic review and meta-analysis. *Obstetrics & Gynecology* 2015;**125**(3):576-82.
5. Sanabria-Martínez G, García-Hermoso A, Poyatos-León R, et al. Effectiveness of physical activity interventions on preventing gestational diabetes mellitus and excessive maternal weight gain: a meta-analysis. *BJOG: An International Journal of Obstetrics & Gynaecology* 2015;**122**(9):1167-74.
6. Jackson M, Gott P, Lye S, et al. The effects of maternal aerobic exercise on human placental development: placental volumetric composition and surface areas. *Placenta* 1995;**16**(2):179-91.
7. Clapp JF, Kim H, Burciu B, et al. Continuing regular exercise during pregnancy: effect of exercise volume on fetoplacental growth. *American journal of obstetrics and gynecology* 2002;**186**(1):142-47.
8. Clapp JF, Kim H, Burciu B, et al. Beginning regular exercise in early pregnancy: effect on fetoplacental growth. *American journal of obstetrics and gynecology* 2000;**183**(6):1484-88.
9. Clapp JF, Capeless EL. The changing glycemic response to exercise during pregnancy. *American journal of obstetrics and gynecology* 1991;**165**(6):1678-83.
10. Hopkins SA, Baldi JC, Cutfield WS, et al. Exercise training in pregnancy reduces offspring size without changes in maternal insulin sensitivity. *The Journal of Clinical Endocrinology & Metabolism* 2010;**95**(5):2080-88.
11. Harrod CS, Chasan-Taber L, Reynolds RM, et al. Physical activity in pregnancy and neonatal body composition: the Healthy Start study. *Obstetrics and gynecology* 2014;**124**(2 Pt 1):257-64.
12. Barker DJ, Godfrey KM, Gluckman PD, et al. Fetal nutrition and cardiovascular disease in adult life. *The Lancet* 1993;**341**(8850):938-41.
13. Barker D, Osmond C, Golding J, et al. Growth in utero, blood pressure in childhood and adult life, and mortality from cardiovascular disease. *Bmj* 1989;**298**(6673):564-67.
14. Martyn C, Barker D, Osmond C. Mothers' pelvic size, fetal growth, and death from stroke and coronary heart disease in men in the UK. *The Lancet* 1996;**348**(9037):1264-68.
15. Ravelli G-P, Stein ZA, Susser MW. Obesity in young men after famine exposure in utero and early infancy. *New England Journal of Medicine* 1976;**295**(7):349-53.
16. Hales CN, Barker DJ. Type 2 (non-insulin-dependent) diabetes mellitus: the thrifty phenotype hypothesis. *Diabetologia* 1992;**35**(7):595-601.
17. Phillips D. Relation of fetal growth to adult muscle mass and glucose tolerance. *Diabetic medicine* 1995;**12**(8):686-90.
18. O'Donovan SM, Murray DM, Hourihane JOB, et al. Cohort profile: the Cork BASELINE Birth Cohort Study: babies after SCOPE: evaluating the longitudinal impact on neurological and nutritional endpoints. *International journal of epidemiology* 2015;**44**(3):764-75.
19. North RA, McCowan LM, Dekker GA, et al. Clinical risk prediction for pre-eclampsia in nulliparous women: development of model in international prospective cohort. *Bmj* 2011;**342**:d1875.
20. McCarthy FP, Khashan AS, North RA, et al. A prospective cohort study investigating associations between hyperemesis gravidarum and cognitive, behavioural and emotional well-being in pregnancy. *PloS one* 2011;**6**(11):e27678.

- 1
- 2
- 3 21. McCowan LM, Dekker GA, Chan E, et al. Spontaneous preterm birth and small for gestational age
- 4 infants in women who stop smoking early in pregnancy: prospective cohort study. *Bmj*
- 5 2009;**338**:b1081.
- 6
- 7 22. Orlando A, Dempster P, Aitkens S. A new air displacement plethysmograph for the measurement
- 8 of body composition in infants. *Pediatric research* 2003;**53**(3):486-92.
- 9
- 10 23. Ellis KJ, Yao, M., Shypailo, R.J., Orlando, A., Wong, W.W., Heird, W.C. Body-composition
- 11 assessment in infancy: air-displacement plethysmography compared with a reference 4-
- 12 compartment model. *American Journal of Clinical Nutrition* 2007;**85**(1):5.
- 13
- 14 24. Roggero P, Gianni ML, Amato O, et al. Evaluation of air-displacement plethysmography for body
- 15 composition assessment in preterm infants. *Pediatric research* 2012;**72**(3):316-20.
- 16
- 17 25. Bell RJ, Palma SM, Lumley JM. The Effect of Vigorous Exercise During Pregnancy on Birth-Weight.
- 18 *Australian and New Zealand journal of obstetrics and gynaecology* 1995;**35**(1):46-51.
- 19
- 20 26. Hawkes CP, Hourihane JOB, Kenny LC, et al. Gender-and gestational age-specific body fat
- 21 percentage at birth. *Pediatrics* 2011;**128**(3):e645-e51.
- 22
- 23 27. Textor J, Hardt J, Knüppel S. DAGitty: a graphical tool for analyzing causal diagrams. *Epidemiology*
- 24 2011;**22**(5):745.
- 25
- 26 28. Moodie EE, Stephens D. Using directed acyclic graphs to detect limitations of traditional
- 27 regression in longitudinal studies. *International journal of public health* 2010;**55**(6):701-03.
- 28
- 29 29. Bodnar LM, Davidian M, Siega-Riz AM, et al. Marginal structural models for analyzing causal
- 30 effects of time-dependent treatments: an application in perinatal epidemiology. *American*
- 31 *Journal of Epidemiology* 2004;**159**(10):926-34.
- 32
- 33 30. Brotman RM, Klebanoff MA, Nansel TR, et al. A longitudinal study of vaginal douching and
- 34 bacterial vaginosis—a marginal structural modeling analysis. *American journal of*
- 35 *epidemiology* 2008;**168**(2):188-96.
- 36
- 37 31. Greenland S, Pearl J, Robins JM. Causal diagrams for epidemiologic research. *Epidemiology*
- 38 1999:37-48.
- 39
- 40 32. Ma G, Yao M, Liu Y, et al. Validation of a new pediatric air-displacement plethysmograph for
- 41 assessing body composition in infants. *The American journal of clinical nutrition*
- 42 2004;**79**(4):653-60.
- 43
- 44 33. Yao M, Nommsen-Rivers L, Dewey K, et al. Preliminary evaluation of a new pediatric air
- 45 displacement plethysmograph for body composition assessment in infants. *Acta*
- 46 *diabetologica* 2003;**40**(1):s55-s58.
- 47
- 48 34. Agency IAE. Body Composition Assessment from Birth to Two Years of Age. IAEA Human Health
- 49 Series. Vienna, 2013.
- 50
- 51 35. DiNallo JM, Downs DS, Masurier GL. Objectively assessing treadmill walking during the second
- 52 and third pregnancy trimesters. *Journal of Physical Activity and Health* 2012;**9**(1):21-28.
- 53
- 54 36. Connolly CP, Coe, D., Kendrick, J.M., Bassett, D. & Thompson, D.L. Accuracy of Physical Activity
- 55 Monitors in Pregnant Women. *Medicine and science in sports and exercise* 2010;**43**(6):1100-
- 56 05.
- 57
- 58 37. Evenson KR, Chasan-Taber L, Symons Downs D, et al. Review of Self-reported Physical Activity
- 59 Assessments for Pregnancy: Summary of the Evidence for Validity and Reliability. *Paediatric*
- 60 *and perinatal epidemiology* 2012;**26**(5):479-94.
38. Harrison CL, Thompson RG, Teede HJ, et al. Measuring physical activity during pregnancy. *International Journal of Behavioral Nutrition and Physical Activity* 2011;**8**(1):1.
39. Evenson KR, Wen F. Measuring physical activity among pregnant women using a structured one-week recall questionnaire: evidence for validity and reliability. *International Journal of Behavioral Nutrition and Physical Activity* 2010;**7**(1):1.
40. Farrar D, Simmonds M, Bryant M, et al. Hyperglycaemia and risk of adverse perinatal outcomes: Systematic review and meta-analysis. *BMJ (Online)* 2016;**354 (no pagination)**(i4694).
41. Poston L. Gestational weight gain: influences on the long-term health of the child. *Current Opinion in Clinical Nutrition & Metabolic Care* 2012;**15**(3):252-57.

- 1
- 2
- 3 42. Ireland Central Statistics Office. Census 2006 Volume 5- Ethnic or Cultural Background (including
- 4 the Irish Traveller Community), 2007.
- 5 43. Artal R, O'toole M. Guidelines of the American College of Obstetricians and Gynecologists for
- 6 exercise during pregnancy and the postpartum period. British journal of sports medicine
- 7 2003;**37**(1):6-12.
- 8 44. National Institute for Health and Care Excellence. NICE Clinical Guidelines, No. 62: Antenatal
- 9 Care: Routine Care for the Healthy Pregnant Woman. London: RCOG Press, 2008.
- 10 45. Clapp JF. Morphometric and neurodevelopmental outcome at age five years of the offspring of
- 11 women who continued to exercise regularly throughout pregnancy. The Journal of pediatrics
- 12 1996;**129**(6):856-63.
- 13
- 14
- 15
- 16
- 17
- 18
- 19
- 20
- 21
- 22
- 23
- 24
- 25
- 26
- 27
- 28
- 29
- 30
- 31
- 32
- 33
- 34
- 35
- 36
- 37
- 38
- 39
- 40
- 41
- 42
- 43
- 44
- 45
- 46
- 47
- 48
- 49
- 50
- 51
- 52
- 53
- 54
- 55
- 56
- 57
- 58
- 59
- 60

For peer review only

Supplementary table 1: Descriptive results for those vs those without PEAPOD measurements

|                                                                      | With PEAPOD<br>(n=1258) | Without PEAPOD<br>(n=513) | Difference (Cork_with<br>– Cork_without) (95%<br>CI) |
|----------------------------------------------------------------------|-------------------------|---------------------------|------------------------------------------------------|
| Sex of infant (% (n) female)                                         | 48.57 (611)             | 50.68 (260)               | -2.11 (-7.25; 3.02)*                                 |
| Birth weight (g) (median;IQR)                                        | 3500 (3180;3800)        | 3380 (3020;3730)          | 130 (80;190)**                                       |
| Gestational age (weeks) (median;IQR)                                 | 40.29 (39.43;41)        | 40 (38.71;40.86)          | 0.29 (0.15;0.43)**                                   |
| Maternal age (years) (mean:SD)                                       | 29.95 (4.44)            | 29.88 (4.61)              | 0.07 (-0.39;0.53)**                                  |
| Maternal BMI (kg/m <sup>2</sup> ) (median:IQR)                       | 23.9 (22;26.9)          | 24 (22;26.9)              | -0.1 (-0.30;0.50)**                                  |
| Maternal Socioeconomic status (median;IQR)                           | 45 (29;51)              | 45 (29;50)                | 0 (-1;0)**                                           |
| Maternal schooling (years) (median;IQR)                              | 13 (13;14)              | 13 (13;14)                | 0 (0;0)**                                            |
| Household income (<€21 000) (yes)(% (n))                             | 8.47 (106)              | 8.22 (42)                 | 0.25 (-2.58;3.10)*                                   |
| Maternal unemployment (yes) (% (n))                                  | 5.56 (70)               | 3.51 (18)                 | 2.06 (0.02;4.09)*                                    |
| 1 <sup>st</sup> trimester smoking (yes) (% (n))                      | 9.30 (117)              | 11.70 (60)                | -2.40 (-5.60;0.82)*                                  |
| 1 <sup>st</sup> trimester alcohol intake (units/week<br>(median;IQR) | 3 (0.6;7)               | 2.8 (0.62;5)              | 0 (-0.5;0)**                                         |

\*tests for proportions for categorical variables (% difference); \*\*t-tests/Wilcoxon rank-sum for continuous variables (difference in means/medians)



Supplementary table 2: Descriptive results for those with vs those without complete data

|                                                                       | Complete data group<br>(n=1200) | Missing data group<br>(n=58) | Difference (Complete –<br>incomplete)<br>(95% CI) |
|-----------------------------------------------------------------------|---------------------------------|------------------------------|---------------------------------------------------|
| Sex of infant (% (n) female)                                          | 49.00 (588)                     | 39.66 (23)                   | 9.34 $-(3.56;22.25)^*$                            |
| Birth weight (g) (mean;SD)                                            | 3510 (465)                      | 3322 (518)                   | 188 (64;311)**                                    |
| Gestational age (weeks) (median;IQR)                                  | 40.29 (39.43;41.00)             | 40.57 (39.29;42.00)          | -0.43 $(-0.86;0.15)^{**}$                         |
| Maternal age (years) (mean;SD)                                        | 29.98 (4.44)                    | 29.13 (4.54)                 | 0.85 $(-0.33;2.02)^{**}$                          |
| Maternal BMI (kg/m <sup>2</sup> ) (median;IQR)                        | 23.9 (22.00;26.8)               | 24.7 (22.00;29.00)           | -0.70 $(-1.90;0.40)^{**}$                         |
| Maternal Socioeconomic status (median;IQR)                            | 45 (29;51.00)                   | 44.5 (29;50.00)              | 0 $(-3.00;4.00)^{**}$                             |
| Maternal schooling (years) (median;IQR)                               | 13 (13;14)                      | 13 (13;14)                   | 0 (0;0)**                                         |
| Household income <€21 000 (yes) (% (n))                               | 8.30 (99)                       | 12.07 (7)                    | -3.77 $(-12.30; 4.76)^*$                          |
| Maternal unemployment (yes) (% (n))                                   | 5.50 (66)                       | 6.90 (4)                     | -1.40 $(-8.04;5.25)^*$                            |
| 1 <sup>st</sup> trimester smoking (yes) (% (n))                       | 9.08 (109)                      | 13.79 (8)                    | -4.71 $(-13.73;4.31)^*$                           |
| 1 <sup>st</sup> trimester alcohol intake (units/week)<br>(median;IQR) | 3 (0.6;7)                       | 3 (0.6;10)                   | -0.10 $(-1.5;0.67)^{**}$                          |

\*tests for proportions for categorical variables (% difference); \*\*t-tests/Wilcoxon rank-sum for continuous variables (difference in means/medians)

1  
2  
3  
4  
5  
6  
7  
8  
9  
10  
11  
12  
13  
14  
15  
16  
17  
18  
19  
20  
21  
22  
23  
24  
25  
26  
27  
28  
29  
30  
31  
32  
33  
34  
35  
36  
37  
38  
39  
40  
41  
42  
43  
44  
45  
46  
47

For peer review only

1  
2  
3  
4  
5  
6  
7  
8  
9  
10  
11  
12  
13  
14  
15  
16  
17  
18  
19  
20  
21  
22  
23  
24  
25  
26  
27  
28  
29  
30  
31  
32  
33  
34  
35  
36  
37  
38  
39  
40  
41  
42  
43  
44  
45  
46  
47  
48  
49  
50  
51  
52  
53  
54  
55



1  
2  
3  
4  
5  
6  
7  
8  
9  
10  
11  
12  
13  
14  
15  
16  
17  
18  
19  
20  
21  
22  
23  
24  
25  
26  
27  
28  
29  
30  
31  
32  
33  
34  
35  
36  
37  
38  
39  
40  
41  
42  
43  
44  
45  
46  
47  
48  
49  
50  
51  
52  
53  
54  
55  
56  
57  
58  
59  
60

## STROBE Statement—checklist of items that should be included in reports of observational studies

|                              | Item No | Recommendation                                                                                                                                                                                                                                                                                                                                                                                                                                                         | Page |
|------------------------------|---------|------------------------------------------------------------------------------------------------------------------------------------------------------------------------------------------------------------------------------------------------------------------------------------------------------------------------------------------------------------------------------------------------------------------------------------------------------------------------|------|
| <b>Title and abstract</b>    | 1       | (a) Indicate the study's design with a commonly used term in the title or the abstract                                                                                                                                                                                                                                                                                                                                                                                 | 1    |
|                              |         | (b) Provide in the abstract an informative and balanced summary of what was done and what was found                                                                                                                                                                                                                                                                                                                                                                    | 2    |
| <b>Introduction</b>          |         |                                                                                                                                                                                                                                                                                                                                                                                                                                                                        |      |
| Background/rationale         | 2       | Explain the scientific background and rationale for the investigation being reported                                                                                                                                                                                                                                                                                                                                                                                   | 4    |
| Objectives                   | 3       | State specific objectives, including any prespecified hypotheses                                                                                                                                                                                                                                                                                                                                                                                                       | 5    |
| <b>Methods</b>               |         |                                                                                                                                                                                                                                                                                                                                                                                                                                                                        |      |
| Study design                 | 4       | Present key elements of study design early in the paper                                                                                                                                                                                                                                                                                                                                                                                                                | 6    |
| Setting                      | 5       | Describe the setting, locations, and relevant dates, including periods of recruitment, exposure, follow-up, and data collection                                                                                                                                                                                                                                                                                                                                        | 6    |
| Participants                 | 6       | (a) <i>Cohort study</i> —Give the eligibility criteria, and the sources and methods of selection of participants. Describe methods of follow-up<br><i>Case-control study</i> —Give the eligibility criteria, and the sources and methods of case ascertainment and control selection. Give the rationale for the choice of cases and controls<br><i>Cross-sectional study</i> —Give the eligibility criteria, and the sources and methods of selection of participants | 6    |
|                              |         | (b) <i>Cohort study</i> —For matched studies, give matching criteria and number of exposed and unexposed<br><i>Case-control study</i> —For matched studies, give matching criteria and the number of controls per case                                                                                                                                                                                                                                                 |      |
| Variables                    | 7       | Clearly define all outcomes, exposures, predictors, potential confounders, and effect modifiers. Give diagnostic criteria, if applicable                                                                                                                                                                                                                                                                                                                               | 6-8  |
| Data sources/<br>measurement | 8*      | For each variable of interest, give sources of data and details of methods of assessment (measurement). Describe comparability of assessment methods if there is more than one group                                                                                                                                                                                                                                                                                   | 6-7  |
| Bias                         | 9       | Describe any efforts to address potential sources of bias                                                                                                                                                                                                                                                                                                                                                                                                              | 7-8  |
| Study size                   | 10      | Explain how the study size was arrived at                                                                                                                                                                                                                                                                                                                                                                                                                              | 9    |
| Quantitative variables       | 11      | Explain how quantitative variables were handled in the analyses. If applicable, describe which groupings were chosen and why                                                                                                                                                                                                                                                                                                                                           | 7    |
| Statistical methods          | 12      | (a) Describe all statistical methods, including those used to control for confounding                                                                                                                                                                                                                                                                                                                                                                                  | 7-8  |
|                              |         | (b) Describe any methods used to examine subgroups and interactions                                                                                                                                                                                                                                                                                                                                                                                                    | 7    |
|                              |         | (c) Explain how missing data were addressed                                                                                                                                                                                                                                                                                                                                                                                                                            | 7    |
|                              |         | (d) <i>Cohort study</i> —If applicable, explain how loss to follow-up was addressed<br><i>Case-control study</i> —If applicable, explain how matching of cases and controls was addressed<br><i>Cross-sectional study</i> —If applicable, describe analytical methods taking account of sampling strategy                                                                                                                                                              |      |

1  
2  
3  
4  
5  
6  
7  
8  
9  
10  
11  
12  
13  
14  
15  
16  
17  
18  
19  
20  
21  
22  
23  
24  
25  
26  
27  
28  
29  
30  
31  
32  
33  
34  
35  
36  
37  
38  
39  
40  
41  
42  
43  
44  
45  
46  
47  
48  
49  
50  
51  
52  
53  
54  
55  
56  
57  
58  
59  
60

(e) Describe any sensitivity analyses

Continued on next page

For peer review only

| <b>Results</b>           |     | <b>Page</b>                                                                                                                                                                                                                                                                                                                                                                                                   |         |
|--------------------------|-----|---------------------------------------------------------------------------------------------------------------------------------------------------------------------------------------------------------------------------------------------------------------------------------------------------------------------------------------------------------------------------------------------------------------|---------|
| Participants             | 13* | (a) Report numbers of individuals at each stage of study—eg numbers potentially eligible, examined for eligibility, confirmed eligible, included in the study, completing follow-up, and analysed<br>(b) Give reasons for non-participation at each stage<br>(c) Consider use of a flow diagram                                                                                                               | 9       |
| Descriptive data         | 14* | (a) Give characteristics of study participants (eg demographic, clinical, social) and information on exposures and potential confounders<br>(b) Indicate number of participants with missing data for each variable of interest<br>(c) <i>Cohort study</i> —Summarise follow-up time (eg, average and total amount)                                                                                           | 9,11    |
| Outcome data             | 15* | <i>Cohort study</i> —Report numbers of outcome events or summary measures over time<br><i>Case-control study</i> —Report numbers in each exposure category, or summary measures of exposure<br><i>Cross-sectional study</i> —Report numbers of outcome events or summary measures                                                                                                                             |         |
| Main results             | 16  | (a) Give unadjusted estimates and, if applicable, confounder-adjusted estimates and their precision (eg, 95% confidence interval). Make clear which confounders were adjusted for and why they were included<br>(b) Report category boundaries when continuous variables were categorized<br>(c) If relevant, consider translating estimates of relative risk into absolute risk for a meaningful time period | 9,12-14 |
| Other analyses           | 17  | Report other analyses done—eg analyses of subgroups and interactions, and sensitivity analyses                                                                                                                                                                                                                                                                                                                | 13      |
| <b>Discussion</b>        |     |                                                                                                                                                                                                                                                                                                                                                                                                               |         |
| Key results              | 18  | Summarise key results with reference to study objectives                                                                                                                                                                                                                                                                                                                                                      | 15      |
| Limitations              | 19  | Discuss limitations of the study, taking into account sources of potential bias or imprecision. Discuss both direction and magnitude of any potential bias                                                                                                                                                                                                                                                    | 15      |
| Interpretation           | 20  | Give a cautious overall interpretation of results considering objectives, limitations, multiplicity of analyses, results from similar studies, and other relevant evidence                                                                                                                                                                                                                                    | 17-19   |
| Generalisability         | 21  | Discuss the generalisability (external validity) of the study results                                                                                                                                                                                                                                                                                                                                         | 17      |
| <b>Other information</b> |     |                                                                                                                                                                                                                                                                                                                                                                                                               |         |
| Funding                  | 22  | Give the source of funding and the role of the funders for the present study and, if applicable, for the original study on which the present article is based                                                                                                                                                                                                                                                 | 19      |

\*Give information separately for cases and controls in case-control studies and, if applicable, for exposed and unexposed groups in cohort and cross-sectional studies.

**Note:** An Explanation and Elaboration article discusses each checklist item and gives methodological background and published examples of transparent reporting. The STROBE checklist is best used in conjunction with this article (freely available on the Web sites of PLoS Medicine at <http://www.plosmedicine.org/>, Annals of Internal Medicine at <http://www.annals.org/>, and Epidemiology at <http://www.epidem.com/>). Information on the STROBE Initiative is available at [www.strobe-statement.org](http://www.strobe-statement.org).
