# Supplementary material for: Do changing levels of maternal exercise during pregnancy affect neonatal adiposity? Secondary analysis of the babies after SCOPE: evaluating the longitudinal impact using neurological and nutritional endpoints (BASELINE) birth cohort (Cork, Ireland)
Source: PubMed Central journal article supplement — BMJ Open. 2017 Dec 1;7(11):e017987. doi: 10.1136/bmjopen-2017-017987 (PMC5719326; doi:10.1136/bmjopen-2017-017987), 2017-12-01
Supplement: bmjopen-2017-017987supp001.pdf [file bmjopen-2017-017987supp001.pdf]

Supplementary table 1: Descriptive results for those vs those without PEAPOD measurements

|                                                                      | With PEAPOD<br>(n=1258) | Without PEAPOD<br>(n=513) | Difference (Cork_with<br>– Cork_without) (95%<br>CI) |
|----------------------------------------------------------------------|-------------------------|---------------------------|------------------------------------------------------|
| Sex of infant (% (n) female)                                         | 48.57 (611)             | 50.68 (260)               | -2.11 (-7.25; 3.02)*                                 |
| Birth weight (g) (median;IQR)                                        | 3500 (3180;3800)        | 3380 (3020;3730)          | 130 (80;190)**                                       |
| Gestational age (weeks) (median;IQR)                                 | 40.29 (39.43;41)        | 40 (38.71;40.86)          | 0.29 (0.15;0.43)**                                   |
| Maternal age (years) (mean:SD)                                       | 29.95 (4.44)            | 29.88 (4.61)              | 0.07 (-0.39;0.53)**                                  |
| Maternal BMI (kg/m <sup>2</sup> ) (median:IQR)                       | 23.9 (22;26.9)          | 24 (22;26.9)              | -0.1 (-0.30;0.50)**                                  |
| Maternal Socioeconomic status (median;IQR)                           | 45 (29;51)              | 45 (29;50)                | 0 (-1;0)**                                           |
| Maternal schooling (years) (median;IQR)                              | 13 (13;14)              | 13 (13;14)                | 0 (0;0)**                                            |
| Household income (<€21 000) (yes)(% (n))                             | 8.47 (106)              | 8.22 (42)                 | 0.25 (-2.58;3.10)*                                   |
| Maternal unemployment (yes) (% (n))                                  | 5.56 (70)               | 3.51 (18)                 | 2.06 (0.02;4.09)*                                    |
| 1 <sup>st</sup> trimester smoking (yes) (% (n))                      | 9.30 (117)              | 11.70 (60)                | -2.40 (-5.60;0.82)*                                  |
| 1 <sup>st</sup> trimester alcohol intake (units/week<br>(median;IQR) | 3 (0.6;7)               | 2.8 (0.62;5)              | 0 (-0.5;0)**                                         |

\*tests for proportions for categorical variables (% difference); \*\*t-tests/Wilcoxon rank-sum for continuous variables (difference in means/medians)

Supplementary table 2: Descriptive results for those with vs those without complete data

|                                                                       | Complete data group<br>(n=1200) | Missing data group<br>(n=58) | Difference (Complete –<br>incomplete)<br>(95% CI) |
|-----------------------------------------------------------------------|---------------------------------|------------------------------|---------------------------------------------------|
| Sex of infant (% (n) female)                                          | 49.00 (588)                     | 39.66 (23)                   | 9.34 (-3.56;22.25)*                               |
| Birth weight (g) (mean;SD)                                            | 3510 (465)                      | 3322 (518)                   | 188 (64;311)**                                    |
| Gestational age (weeks) (median;IQR)                                  | 40.29 (39.43;41.00)             | 40.57 (39.29;42.00)          | -0.43 (-0.86;0.15)**                              |
| Maternal age (years) (mean;SD)                                        | 29.98 (4.44)                    | 29.13 (4.54)                 | 0.85 (-0.33;2.02)**                               |
| Maternal BMI (kg/m <sup>2</sup> ) (median;IQR)                        | 23.9 (22.00;26.8)               | 24.7 (22.00;29.00)           | -0.70 (-1.90;0.40)**                              |
| Maternal Socioeconomic status (median;IQR)                            | 45 (29;51.00)                   | 44.5 (29;50.00)              | 0 (-3.00;4.00)**                                  |
| Maternal schooling (years) (median;IQR)                               | 13 (13;14)                      | 13 (13;14)                   | 0 (0;0)**                                         |
| Household income <€21 000 (yes) (% (n))                               | 8.30 (99)                       | 12.07 (7)                    | -3.77 (-12.30; 4.76)*                             |
| Maternal unemployment (yes) (% (n))                                   | 5.50 (66)                       | 6.90 (4)                     | -1.40 (-8.04;5.25)*                               |
| 1 <sup>st</sup> trimester smoking (yes) (% (n))                       | 9.08 (109)                      | 13.79 (8)                    | -4.71 (-13.73;4.31)*                              |
| 1 <sup>st</sup> trimester alcohol intake (units/week)<br>(median;IQR) | 3 (0.6;7)                       | 3 (0.6;10)                   | -0.10 (-1.5;0.67)**                               |

\*tests for proportions for categorical variables (% difference); \*\*t-tests/Wilcoxon rank-sum for continuous variables (difference in means/medians)
