# Supplementary figures and images for: Do changing levels of maternal exercise during pregnancy affect neonatal adiposity? Secondary analysis of the babies after SCOPE: evaluating the longitudinal impact using neurological and nutritional endpoints (BASELINE) birth cohort (Cork, Ireland)
Source: PubMed Central journal article supplement — BMJ Open. 2017 Dec 1;7(11):e017987. doi: 10.1136/bmjopen-2017-017987 (PMC5719326; doi:10.1136/bmjopen-2017-017987), 2017-12-01

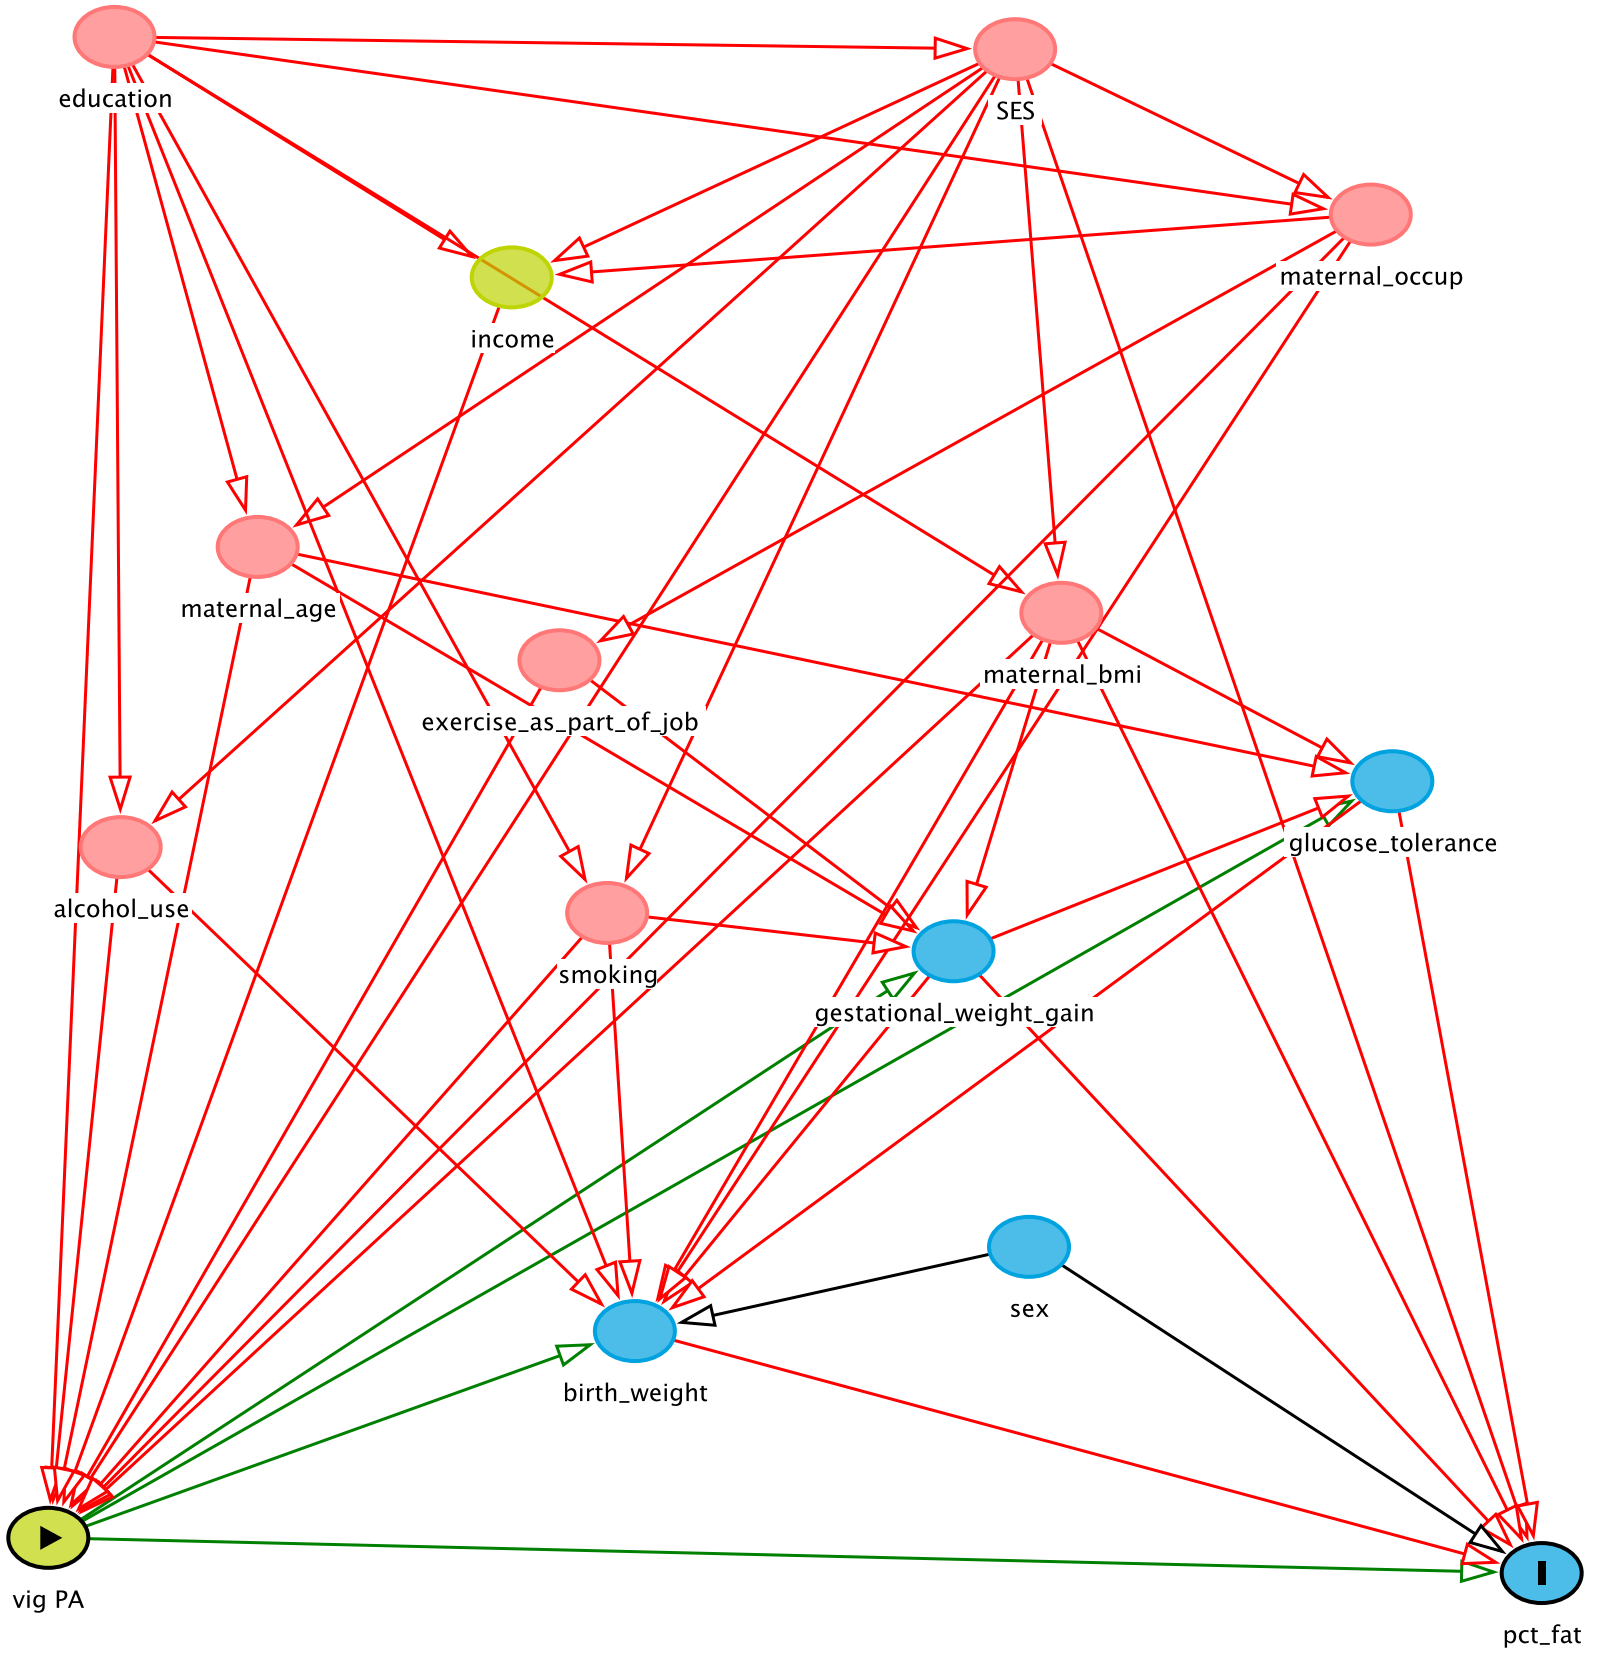

Supplement: bmjopen-2017-017987supp002.pdf [file bmjopen-2017-017987supp002.pdf]
